# Supplementary material for: Fine-mapping studies distinguish genetic risks for childhood- and adult-onset asthma in the HLA region
Source: Genome Med. 2022 May 24;14:55. doi: 10.1186/s13073-022-01058-2 (PMC9128203; doi:10.1186/s13073-022-01058-2)
Supplement: Supplementary file 2 — Additional file 2: Table S2. HLA Allele Associations. Table S3. Allele Associations: Additive vs. Dominant Model. Table S4. HLA Heterogeneity Test. Table S5. HLA Amino Acid Polymorphism Associations. Table S8. SuSiE Credible Set Results. Table S9. HLA Allele Frequencies by Study. Table S10. List of SNPs in the Credible Sets Excluded from eQTL Analyses. Table S11. eQTL Results for All Credible Set SNPs. Table S13. eQTL Fine-Mapping Results. Table S15. Amino Acids in the Credible Sets and Their Corresponding HLA Alleles. Table S20. Replication Meta-Analysis Results. [file 13073_2022_1058_MOESM2_ESM.xlsx]

## Sheet: Table of Contents
Supplemental Tables
S2	Table S2. HLA Allele Associations
S3	Table S3. Allele Associations: Additive vs. Dominant Model
S4	Table S4. HLA Heterogeneity Test
S5	Table S5. HLA Amino Acid Polymorphism Associations
S8	Table S8. SuSiE Credible Set Results
S9	Table S9. HLA Allele Frequencies by Study
S10	Table S10. List of SNPs in the Credible Sets Excluded from eQTL Analyses
S11	Table S11. eQTL Results for All Credible Set SNPs
S13	Table S13. eQTL Fine-Mapping Results
S15	Table S15. Amino Acids in the Credible Sets and Their Corresponding HLA Alleles
S20	Table S20. Replication Meta-Analysis Results
For Tables S1, S6, S7, S12, S14, S16, S17, S18, S19 see Additional File 1

## Sheet: S2
Table S2. HLA Allele Associations
Results are shown for each HLA allele with frequency > 1%. Significant association p-values (<5x10-8) with are shown in bold font and highlighted blue for childhood-onset asthma and red for adult-onset asthma.
	Childhood-Onset Asthma					Adult-Onset Asthma
HLA allele	p-value	OR	95% CI	beta	SE	p-value	OR	95% CI	beta	SE
A*01:01	0.0522786	1.03671	0.999-1.075	0.0360568	0.018578	0.00861519	1.03344	1.008-1.059	0.0328919	0.0125209
A*02:01	0.00605383	0.954862	0.923-0.986	-0.0461884	0.0168273	0.882651	0.998345	0.976-1.020	-0.00165621	0.0112203
A*03:01	0.186422	0.972387	0.932-1.013	-0.0280011	0.0211931	0.00117492	0.95445	0.927-0.981	-0.0466196	0.014367
A*11:01	0.878651	1.00475	0.945-1.067	0.00473705	0.0310261	0.0323254	0.955401	0.916-0.996	-0.0456243	0.0213161
A*23:01	0.738675	1.0192	0.911-1.139	0.019019	0.0570101	0.943093	1.00276	0.929-1.081	0.00275822	0.0386397
A*24:02	0.93642	1.00229	0.947-1.060	0.00228251	0.0286134	0.188469	1.02548	0.987-1.064	0.0251584	0.0191301
A*25:01	0.039788	1.1247	1.005-1.258	0.11752	0.0571613	0.772322	1.01176	0.934-1.095	0.0116885	0.0403972
A*26:01	0.974936	1.00173	0.899-1.115	0.0017314	0.0551074	0.944698	1.00258	0.932-1.078	0.00257334	0.0370981
A*29:02	0.000579861	1.12798	1.053-1.208	0.120427	0.034999	0.380981	1.02178	0.973-1.072	0.0215497	0.0245976
A*30:01	0.117024	1.11646	0.972-1.281	0.110167	0.0702866	0.947024	1.00331	0.910-1.106	0.0033059	0.0497545
A*31:01	0.570778	1.0261	0.938-1.121	0.0257647	0.0454479	0.000257894	1.11433	1.051-1.180	0.108255	0.0296242
A*32:01	0.7385	1.01355	0.936-1.096	0.0134545	0.0403022	0.810326	1.00658	0.954-1.061	0.00655653	0.0273182
A*68:01	0.0383262	0.911077	0.834-0.995	-0.0931274	0.0449598	0.525728	0.981586	0.926-1.039	-0.0185856	0.0292899
B*07:02	0.134194	0.96885	0.929-1.009	-0.0316453	0.0211284	7.98247e-07	0.931508	0.905-0.958	-0.0709503	0.0143747
B*08:01	3.21499e-06	1.09982	1.056-1.144	0.0951475	0.0204329	9.194e-10	1.0884	1.059-1.118	0.0847085	0.0138349
B*13:02	0.941125	1.00399	0.903-1.115	0.00398266	0.0539245	0.190282	1.04763	0.977-1.123	0.0465323	0.0355277
B*14:01	0.52601	0.955791	0.831-1.099	-0.0452162	0.0713067	0.224937	0.943296	0.858-1.036	-0.0583748	0.0481043
B*14:02	0.198192	0.939647	0.854-1.033	-0.0622507	0.0483793	0.00582053	0.913375	0.856-0.974	-0.0906085	0.0328563
B*15:01	0.00112974	1.10135	1.039-1.167	0.0965387	0.029649	3.86805e-07	1.10689	1.064-1.151	0.101556	0.0200097
B*18:01	0.683221	1.01622	0.940-1.097	0.0160896	0.0394283	0.158115	0.962289	0.912-1.015	-0.0384401	0.0272346
B*27:05	0.0555024	0.927002	0.857-1.001	-0.0757991	0.0395834	0.912048	0.997154	0.947-1.048	-0.00284983	0.0258007
B*35:01	5.20423e-13	0.749359	0.692-0.810	-0.288537	0.0399643	2.22265e-06	0.888665	0.846-0.933	-0.118035	0.0249437
B*37:01	0.52662	0.959505	0.844-1.090	-0.0413379	0.0652868	0.246559	0.95016	0.871-1.035	-0.0511245	0.0441205
B*40:01	0.26321	0.964155	0.904-1.027	-0.0365036	0.0326264	0.673392	0.990858	0.949-1.034	-0.00918437	0.0217899
B*44:02	4.05904e-10	1.1501	1.100-1.201	0.139851	0.02237	0.00288864	1.04758	1.016-1.080	0.0464818	0.0156013
B*44:03	4.7321e-05	1.13062	1.065-1.199	0.122762	0.0301739	0.0568114	1.04084	0.998-1.084	0.0400301	0.0210158
B*49:01	0.98376	0.99858	0.870-1.145	-0.0014213	0.0698261	0.744343	0.984725	0.897-1.080	-0.0153924	0.0472004
B*51:01	0.149646	0.942931	0.870-1.021	-0.0587623	0.0407849	0.3197	1.0268	0.974-1.081	0.0264461	0.026577
B*55:01	0.180516	0.926823	0.829-1.035	-0.0759923	0.056746	0.211917	0.953997	0.885-1.027	-0.0470951	0.0377271
B*57:01	0.000496994	0.868862	0.802-0.940	-0.14057	0.0403663	1.30725e-05	0.889503	0.843-0.937	-0.117092	0.0268629
C*01:02	3.50798e-06	0.81217	0.743-0.886	-0.208046	0.0448512	0.0962535	0.954539	0.903-1.008	-0.0465272	0.0279729
C*02:02	0.653371	1.01782	0.942-1.099	0.0176618	0.0393283	0.138604	1.03981	0.987-1.094	0.0390386	0.0263594
C*03:03	0.690309	1.0129	0.951-1.078	0.0128138	0.0321602	0.00965926	1.05678	1.013-1.101	0.0552264	0.0213411
C*03:04	0.231426	1.03274	0.979-1.088	0.0322163	0.0269211	0.0602823	1.03476	0.998-1.072	0.0341661	0.0181858
C*04:01	6.15813e-12	0.819355	0.774-0.867	-0.199238	0.0289761	5.38826e-06	0.918847	0.885-0.952	-0.0846357	0.018605
C*05:01	6.34657e-09	1.13821	1.089-1.189	0.12946	0.0222924	0.0817624	1.0275	0.996-1.059	0.0271306	0.0155873
C*06:02	0.027289	0.943347	0.895-0.993	-0.058321	0.0264212	0.00927658	0.955009	0.922-0.988	-0.0460349	0.0176942
C*07:01	0.000483311	1.06877	1.029-1.109	0.066511	0.0190585	1.51312e-06	1.06386	1.037-1.091	0.0619061	0.0128716
C*07:02	0.141521	0.970273	0.932-1.010	-0.0301778	0.020527	4.81027e-06	0.938248	0.912-0.964	-0.0637404	0.0139387
C*07:04	0.00630745	1.15637	1.041-1.283	0.145286	0.0531919	0.142833	1.05612	0.981-1.136	0.0546047	0.0372646
C*08:02	0.121496	0.938721	0.866-1.016	-0.0632371	0.040837	0.00535275	0.92618	0.877-0.977	-0.0766871	0.0275357
C*12:03	0.0959234	0.926135	0.846-1.013	-0.0767355	0.0460889	0.532833	0.981257	0.924-1.041	-0.0189205	0.0303365
C*15:02	0.70866	0.978658	0.873-1.095	-0.0215728	0.0577344	0.220589	1.04748	0.972-1.128	0.0463865	0.0378676
C*16:01	8.90574e-06	1.16269	1.087-1.242	0.150736	0.0339329	0.0152791	1.0594	1.011-1.109	0.0576999	0.0237869
DQA1*01:01	1.98301e-35	0.746936	0.713-0.782	-0.291775	0.0234884	1.88741e-16	0.885249	0.859-0.911	-0.121886	0.0148118
DQA1*01:02	0.18425	0.975145	0.939-1.012	-0.025169	0.0189557	1.2309e-13	0.908006	0.885-0.931	-0.0965044	0.0130175
DQA1*01:03	5.07675e-10	0.802018	0.748-0.859	-0.220624	0.0354889	1.45458e-08	0.877717	0.839-0.918	-0.130431	0.0230166
DQA1*02:01	0.95215	0.998734	0.958-1.040	-0.00126669	0.0211092	0.954066	1.00082	0.973-1.029	0.000817216	0.0141875
DQA1*03:01	7.26404e-17	1.15968	1.120-1.200	0.148146	0.0177577	6.90967e-47	1.18715	1.159-1.215	0.171559	0.0119304
DQA1*04:01	0.0478634	0.895599	0.802-0.998	-0.110262	0.055728	0.445535	0.97265	0.905-1.044	-0.0277306	0.0363499
DQA1*05:01	2.00526e-14	1.14043	1.102-1.179	0.131401	0.017176	0.00292173	1.03592	1.012-1.060	0.0352872	0.0118579
DQB1*02:01	2.93363e-09	1.12606	1.082-1.171	0.118721	0.0200026	8.5175e-05	1.05559	1.027-1.084	0.0540952	0.013767
DQB1*02:02	0.0283831	1.06043	1.006-1.117	0.0586749	0.0267684	0.0494498	1.0363	1.000-1.073	0.0356559	0.0181484
DQB1*03:01	4.14639e-18	1.17502	1.132-1.218	0.161281	0.0185921	1.8189e-09	1.08049	1.053-1.108	0.0774113	0.0128735
DQB1*03:02	0.000465104	1.08619	1.037-1.137	0.0826754	0.0236209	5.6793e-25	1.17415	1.138-1.210	0.160548	0.0155559
DQB1*03:03	0.00122027	0.893592	0.834-0.956	-0.112506	0.0347875	0.206334	0.971852	0.929-1.015	-0.0285521	0.0225939
DQB1*04:02	0.0418857	0.893909	0.802-0.995	-0.112151	0.0551206	0.204944	0.955146	0.889-1.025	-0.0458914	0.0362036
DQB1*05:01	4.18038e-25	0.77216	0.735-0.810	-0.258563	0.0249817	1.73495e-13	0.889719	0.862-0.917	-0.116849	0.0158595
DQB1*05:03	1.35051e-11	0.662942	0.588-0.746	-0.411068	0.0607809	0.00507232	0.905299	0.844-0.970	-0.0994902	0.0355017
DQB1*06:02	0.0233346	1.04865	1.006-1.092	0.0475067	0.0209473	1.20611e-08	0.919584	0.893-0.946	-0.0838342	0.0147107
DQB1*06:03	9.87597e-09	0.81117	0.755-0.871	-0.209278	0.0365051	5.09823e-10	0.86152	0.821-0.902	-0.149057	0.0239793
DQB1*06:04	2.46807e-07	0.77053	0.697-0.850	-0.260676	0.0505176	4.26122e-05	0.877257	0.823-0.934	-0.130956	0.0319963
DQB1*06:09	0.0720073	0.867862	0.743-1.012	-0.141722	0.0787752	0.321755	0.95088	0.860-1.050	-0.0503677	0.0508324
DRB1*01:01	3.64844e-23	0.753691	0.712-0.797	-0.282772	0.0285249	2.41079e-11	0.88719	0.856-0.918	-0.119696	0.0179221
DRB1*01:03	0.000656077	0.806157	0.712-0.912	-0.215477	0.0632397	0.355416	0.964694	0.893-1.041	-0.0359443	0.0388951
DRB1*03:01	3.8352e-10	1.13337	1.089-1.178	0.125193	0.0199969	0.00013316	1.05413	1.026-1.083	0.0527173	0.0137984
DRB1*04:01	8.55895e-22	1.23586	1.183-1.290	0.21177	0.0220755	1.03121e-34	1.20348	1.168-1.239	0.185218	0.0150712
DRB1*04:04	0.151493	1.05453	0.980-1.133	0.0530951	0.0370187	1.00766e-05	1.11411	1.061-1.168	0.108053	0.0244713
DRB1*07:01	0.928572	0.998117	0.957-1.040	-0.00188508	0.021029	0.936857	0.99888	0.971-1.026	-0.00112025	0.0141409
DRB1*08:01	0.0565958	0.895134	0.798-1.003	-0.110781	0.0581097	0.641826	0.982605	0.912-1.058	-0.0175484	0.0377266
DRB1*09:01	0.865681	1.01105	0.890-1.148	0.0109884	0.0649638	0.000299601	1.16052	1.070-1.258	0.148865	0.0411724
DRB1*11:01	4.29282e-10	1.26981	1.178-1.368	0.238868	0.0382618	0.0257537	1.06402	1.007-1.123	0.0620573	0.0278296
DRB1*11:04	0.296074	0.926067	0.801-1.069	-0.0768082	0.0735084	0.663985	0.979083	0.890-1.077	-0.0211387	0.0486599
DRB1*12:01	0.50688	0.959043	0.847-1.085	-0.0418191	0.0630088	0.000114355	0.839856	0.768-0.917	-0.174524	0.0452379
DRB1*13:01	1.96247e-08	0.813755	0.757-0.874	-0.206096	0.0367028	1.68506e-09	0.864743	0.824-0.906	-0.145323	0.0241176
DRB1*13:02	7.27388e-08	0.794903	0.731-0.864	-0.229535	0.0426306	2.23059e-05	0.89093	0.844-0.939	-0.11549	0.0272352
DRB1*14:01	4.53843e-10	0.670632	0.591-0.760	-0.399534	0.0640866	0.0122485	0.909949	0.845-0.979	-0.0943673	0.037673
DRB1*15:01	0.0550788	1.04074	0.999-1.084	0.0399345	0.0208182	3.55917e-09	0.91744	0.891-0.944	-0.0861681	0.0145962

## Sheet: S3
Table S3. Allele Associations: Additive vs. Dominant Model
For each HLA allele, the p-value, odds ratio (OR), and number of homozygotes are shown for for childhood- and adult-onset asthma
HLA allele	p-value	OR	p_dom	OR_dom	N_hom
Childhood-Onset Asthma
A*01:01	0.0522786	1.03671	0.015056	1.05442	12278
A*02:01	0.00605383	0.954862	0.0145096	0.950034	25258
A*03:01	0.186422	0.972387	0.127844	0.964453	7016
A*11:01	0.878651	1.00475	0.927625	1.00295	1207
A*23:01	0.738675	1.0192	0.704402	1.0221	93
A*24:02	0.93642	1.00229	0.976384	0.999117	1780
A*25:01	0.039788	1.1247	0.0177387	1.13439	84
A*26:01	0.974936	1.00173	0.964605	1.00239	107
A*29:02	0.000579861	1.12798	0.00031409	1.13907	575
A*30:01	0.117024	1.11646	0.108243	1.12082	48
A*31:01	0.570778	1.0261	0.470531	1.03381	215
A*32:01	0.7385	1.01355	0.715869	1.01508	376
A*68:01	0.0383262	0.911077	0.0314025	0.906034	323
B*07:02	0.134194	0.96885	0.108549	0.96281	7337
B*08:01	3.21499e-06	1.09982	8.51527e-08	1.13148	6926
B*13:02	0.941125	1.00399	0.8094	1.01319	143
B*14:01	0.52601	0.955791	0.580213	0.961537	43
B*14:02	0.198192	0.939647	0.19652	0.938486	224
B*15:01	0.00112974	1.10135	0.000161926	1.12189	1408
B*18:01	0.683221	1.01622	0.817724	1.0093	453
B*27:05	0.0555024	0.927002	0.0624161	0.928221	501
B*35:01	5.20423e-13	0.749359	7.27323e-12	0.761805	767
B*37:01	0.52662	0.959505	0.463961	0.953102	70
B*40:01	0.26321	0.964155	0.434113	0.973934	1034
B*44:02	4.05904e-10	1.1501	3.25338e-10	1.16698	4170
B*44:03	4.7321e-05	1.13062	0.000115446	1.1294	1098
B*49:01	0.98376	0.99858	0.993885	1.00054	46
B*51:01	0.149646	0.942931	0.261372	0.955283	467
B*55:01	0.180516	0.926823	0.204764	0.929924	128
B*57:01	0.000496994	0.868862	0.000497725	0.865763	534
C*01:02	3.50798e-06	0.81217	4.66815e-06	0.811143	372
C*02:02	0.653371	1.01782	0.712885	1.01495	414
C*03:03	0.690309	1.0129	0.653652	1.01503	1090
C*03:04	0.231426	1.03274	0.128143	1.04424	2184
C*04:01	6.15813e-12	0.819355	2.95005e-11	0.816164	2318
C*05:01	6.34657e-09	1.13821	1.52609e-09	1.15979	4270
C*06:02	0.027289	0.943347	0.0465791	0.945429	2725
C*07:01	0.000483311	1.06877	6.17805e-05	1.09255	10218
C*07:02	0.141521	0.970273	0.141297	0.966486	8299
C*07:04	0.00630745	1.15637	0.00473262	1.16459	116
C*08:02	0.121496	0.938721	0.113591	0.936021	411
C*12:03	0.0959234	0.926135	0.0766848	0.91995	269
C*15:02	0.70866	0.978658	0.778468	0.984132	108
C*16:01	8.90574e-06	1.16269	3.24581e-06	1.17737	624
DQA1*01:01	1.98301e-35	0.746936	5.96311e-33	0.73652	6799
DQA1*01:02	0.18425	0.975145	0.596285	0.988405	12290
DQA1*01:03	5.07675e-10	0.802018	3.38748e-10	0.794552	1021
DQA1*02:01	0.95215	0.998734	0.508809	1.01565	7018
DQA1*03:01	7.26404e-17	1.15968	1.00963e-18	1.20712	13460
DQA1*04:01	0.0478634	0.895599	0.0436732	0.892383	139
DQA1*05:01	2.00526e-14	1.14043	4.38282e-15	1.17932	17673
DQB1*02:01	2.93363e-09	1.12606	1.37925e-12	1.17445	7498
DQB1*02:02	0.0283831	1.06043	0.00625006	1.07304	3502
DQB1*03:01	4.14639e-18	1.17502	2.13803e-19	1.21664	10184
DQB1*03:02	0.000465104	1.08619	0.00035075	1.09629	3415
DQB1*03:03	0.00122027	0.893592	0.00288237	0.898398	928
DQB1*04:02	0.0418857	0.893909	0.041893	0.892668	143
DQB1*05:01	4.18038e-25	0.77216	1.14614e-22	0.768507	4916
DQB1*05:03	1.35051e-11	0.662942	1.07335e-11	0.659102	150
DQB1*06:02	0.0233346	1.04865	0.00142427	1.07715	7011
DQB1*06:03	9.87597e-09	0.81117	9.70554e-09	0.807796	902
DQB1*06:04	2.46807e-07	0.77053	4.95849e-07	0.774357	249
DQB1*06:09	0.0720073	0.867862	0.0832338	0.872853	41
DRB1*01:01	3.64844e-23	0.753691	4.21162e-21	0.755459	3066
DRB1*01:03	0.000656077	0.806157	0.00046484	0.801863	122
DRB1*03:01	3.8352e-10	1.13337	8.77058e-14	1.18465	7380
DRB1*04:01	8.55895e-22	1.23586	2.11111e-24	1.27523	4557
DRB1*04:04	0.151493	1.05453	0.161617	1.05345	548
DRB1*07:01	0.928572	0.998117	0.591066	1.01272	7026
DRB1*08:01	0.0565958	0.895134	0.0528679	0.893848	125
DRB1*09:01	0.865681	1.01105	0.822517	1.01475	70
DRB1*11:01	4.29282e-10	1.26981	5.94332e-10	1.2519	489
DRB1*11:04	0.296074	0.926067	0.340965	0.93671	46
DRB1*12:01	0.50688	0.959043	0.485769	0.957307	74
DRB1*13:01	1.96247e-08	0.813755	2.77221e-08	0.811323	865
DRB1*13:02	7.27388e-08	0.794903	1.8392e-07	0.797648	467
DRB1*14:01	4.53843e-10	0.670632	5.27026e-10	0.676615	132
DRB1*15:01	0.0550788	1.04074	0.00271031	1.07227	7136
Adult-Onset Asthma
A*01:01	0.00861519	1.03344	0.000981702	1.04961	12730
A*02:01	0.882651	0.998345	0.691962	0.994425	26275
A*03:01	0.00117492	0.95445	0.00405682	0.954945	7222
A*11:01	0.0323254	0.955401	0.0209974	0.94991	1254
A*23:01	0.943093	1.00276	0.956099	1.00215	98
A*24:02	0.188469	1.02548	0.217513	1.02491	1851
A*25:01	0.772322	1.01176	0.947806	1.00249	92
A*26:01	0.944698	1.00258	0.89512	1.00477	110
A*29:02	0.380981	1.02178	0.338751	1.02457	596
A*30:01	0.947024	1.00331	0.98276	0.998912	52
A*31:01	0.000257894	1.11433	0.000753023	1.10749	240
A*32:01	0.810326	1.00658	0.827598	1.0061	391
A*68:01	0.525728	0.981586	0.656514	0.986835	329
B*07:02	7.98247e-07	0.931508	4.26586e-06	0.929039	7557
B*08:01	9.194e-10	1.0884	2.25715e-12	1.11565	7179
B*13:02	0.190282	1.04763	0.166298	1.05099	152
B*14:01	0.224937	0.943296	0.184405	0.93814	48
B*14:02	0.00582053	0.913375	0.00698206	0.913937	230
B*15:01	3.86805e-07	1.10689	6.56099e-08	1.11803	1470
B*18:01	0.158115	0.962289	0.180193	0.963709	461
B*27:05	0.912048	0.997154	0.850953	0.995098	527
B*35:01	2.22265e-06	0.888665	4.07828e-06	0.890943	805
B*37:01	0.246559	0.95016	0.200786	0.944848	74
B*40:01	0.673392	0.990858	0.756404	0.993001	1078
B*44:02	0.00288864	1.04758	0.00222104	1.05336	4309
B*44:03	0.0568114	1.04084	0.0997383	1.03671	1140
B*49:01	0.744343	0.984725	0.718438	0.983055	47
B*51:01	0.3197	1.0268	0.280114	1.02928	488
B*55:01	0.211917	0.953997	0.173544	0.949244	139
B*57:01	1.30725e-05	0.889503	3.32428e-05	0.89211	546
C*01:02	0.0962535	0.954539	0.0880182	0.952306	391
C*02:02	0.138604	1.03981	0.125068	1.04227	425
C*03:03	0.00965926	1.05678	0.0149629	1.05531	1139
C*03:04	0.0602823	1.03476	0.0432221	1.0397	2271
C*04:01	5.38826e-06	0.918847	6.6365e-06	0.914755	2409
C*05:01	0.0817624	1.0275	0.0644938	1.03201	4419
C*06:02	0.00927658	0.955009	0.00534621	0.948529	2840
C*07:01	1.51312e-06	1.06386	4.5655e-08	1.08495	10602
C*07:02	4.81027e-06	0.938248	1.19612e-05	0.93358	8566
C*07:04	0.142833	1.05612	0.180984	1.05204	125
C*08:02	0.00535275	0.92618	0.00240599	0.917736	433
C*12:03	0.532833	0.981257	0.460128	0.977339	281
C*15:02	0.220589	1.04748	0.250679	1.04399	114
C*16:01	0.0152791	1.0594	0.0185216	1.05966	656
DQA1*01:01	1.88741e-16	0.885249	1.38963e-16	0.872941	7080
DQA1*01:02	1.2309e-13	0.908006	5.2684e-12	0.901506	12671
DQA1*01:03	1.45458e-08	0.877717	5.62934e-09	0.870311	1063
DQA1*02:01	0.954066	1.00082	0.778934	1.00446	7299
DQA1*03:01	6.90967e-47	1.18715	1.65124e-44	1.22255	14122
DQA1*04:01	0.445535	0.97265	0.431242	0.971443	143
DQA1*05:01	0.00292173	1.03592	0.000275625	1.05327	18256
DQB1*02:01	8.5175e-05	1.05559	2.5295e-07	1.08332	7750
DQB1*02:02	0.0494498	1.0363	0.014586	1.04363	3633
DQB1*03:01	1.8189e-09	1.08049	1.2866e-09	1.09473	10575
DQB1*03:02	5.6793e-25	1.17415	6.18167e-23	1.18288	3606
DQB1*03:03	0.206334	0.971852	0.301964	0.97609	960
DQB1*04:02	0.204944	0.955146	0.218772	0.955936	147
DQB1*05:01	1.73495e-13	0.889719	1.80898e-14	0.875323	5140
DQB1*05:03	0.00507232	0.905299	0.00574938	0.905624	155
DQB1*06:02	1.20611e-08	0.919584	4.6785e-08	0.915076	7232
DQB1*06:03	5.09823e-10	0.86152	1.09169e-10	0.853469	936
DQB1*06:04	4.26122e-05	0.877257	7.07211e-05	0.87933	254
DQB1*06:09	0.321755	0.95088	0.358886	0.95455	42
DRB1*01:01	2.41079e-11	0.88719	2.91467e-12	0.875656	3212
DRB1*01:03	0.355416	0.964694	0.352776	0.964593	123
DRB1*03:01	0.00013316	1.05413	4.99221e-07	1.08143	7622
DRB1*04:01	1.03121e-34	1.20348	6.84906e-38	1.23243	4757
DRB1*04:04	1.00766e-05	1.11411	4.80017e-05	1.10563	588
DRB1*07:01	0.936857	0.99888	0.902823	1.00194	7301
DRB1*08:01	0.641826	0.982605	0.627861	0.981917	128
DRB1*09:01	0.000299601	1.16052	0.000116626	1.17245	71
DRB1*11:01	0.0257537	1.06402	0.0151301	1.06561	497
DRB1*11:04	0.663985	0.979083	0.653164	0.979714	49
DRB1*12:01	0.000114355	0.839856	0.000280768	0.850417	72
DRB1*13:01	1.68506e-09	0.864743	9.39763e-10	0.859079	895
DRB1*13:02	2.23059e-05	0.89093	3.50709e-05	0.891174	482
DRB1*14:01	0.0122485	0.909949	0.0124808	0.911336	137
DRB1*15:01	3.55917e-09	0.91744	5.09959e-08	0.91552	7358

## Sheet: S4
Table S4. HLA Heterogeneity Test
The HLA alleles and amino acid polymorphisms that are heterogeneous are shown. For each variant, the childhood-onset (COA) and adult-onset asthma (AOA) p-value, odds ratio (OR) and 95% confidence interval (CI) are shown, along with the direction of the two variants and heterogeneity test results.
gene	variant	COA p-val	COA OR	COA 95% CI	AOA p-val	AOA OR	AOA 95% CI	dir	HetISq	HetChiSq	HetPVal
HLA ALLELE
DQB1	*0602	0.0233346	1.04865	1.006-1.092	1.20611e-08	0.919584	0.893-0.946	+-	96.8	31.534	1.96e-08
DRB1	*1501	0.0550788	1.04074	0.999-1.084	3.55917e-09	0.91744	0.891-0.944	+-	96.7	30.343	3.62e-08
DQB1	*0302	0.000465104	1.08619	1.037-1.137	5.6793e-25	1.17415	1.138-1.210	++	95.5	22.422	2.19e-06
DQA1	*0102	0.18425	0.975145	0.939-1.012	1.2309e-13	0.908006	0.885-0.931	--	94.5	18.086	2.11e-05
DQA1	*0301	7.26404e-17	1.15968	1.120-1.200	6.90967e-47	1.18715	1.159-1.215	++	94.1	17.017	3.7e-05
HLA AMINO ACID POLYMORPHISM
DRB1	47_F	0.00591852	1.0422	1.011-1.073	8.91542e-10	0.939624	0.921-0.958	+-	97.4	39.184	3.86e-10
DQA1	34_E	0.0296044	0.9682	0.940-0.996	3.69128e-09	1.06078	1.040-1.081	-+	96.9	32.373	1.27e-08
DQB1	9_F	0.174776	1.02747	0.988-1.068	3.4353e-09	0.921097	0.896-0.946	+-	96.2	26.156	3.15e-07
DRB1	-1_S	0.172096	1.02858	0.987-1.071	4.98681e-09	0.919239	0.893-0.945	+-	96.1	25.758	3.87e-07
DRB1	71_A	0.172096	1.02858	0.987-1.071	4.98681e-09	0.919239	0.893-0.945	+-	96.1	25.758	3.87e-07
DQB1	9_Y	0.182318	0.973998	0.937-1.012	1.26987e-08	1.08116	1.052-1.110	-+	95.9	24.418	7.76e-07
DQB1	-5_L	0.0979285	0.969639	0.934-1.005	6.33114e-18	0.895287	0.873-0.918	--	95.8	23.721	1.11e-06
DRB1	96_Q	0.448917	1.01534	0.976-1.056	8.87237e-10	0.917967	0.893-0.943	+-	95.7	23.411	1.31e-06
DQB1	185_I	0.891686	1.00265	0.965-1.041	2.1714e-12	1.09408	1.066-1.121	++	95.7	23.236	1.43e-06
DRB1	11_P	0.308474	1.02096	0.981-1.062	6.4885e-09	0.921085	0.895-0.947	+-	95.7	23.012	1.61e-06
DRB1	13_R	0.308474	1.02096	0.981-1.062	6.4885e-09	0.921085	0.895-0.947	+-	95.7	23.012	1.61e-06
DRB1	133_L	0.308474	1.02096	0.981-1.062	6.4885e-09	0.921085	0.895-0.947	+-	95.7	23.012	1.61e-06
DRB1	142_M	0.308474	1.02096	0.981-1.062	6.4885e-09	0.921085	0.895-0.947	+-	95.7	23.012	1.61e-06
DQB1	97_F	0.0925702	0.968822	0.933-1.005	2.64616e-17	0.896154	0.873-0.919	--	95.5	22.424	2.19e-06
DQB1	185_T	0.598688	0.989783	0.952-1.028	8.91354e-13	0.912018	0.889-0.935	--	95.3	21.448	3.64e-06
DQA1	187_T	2.31942e-16	1.15663	1.117-1.197	3.63214e-47	1.1874	1.160-1.215	++	94.5	18.105	2.09e-05
DQA1	26_S	2.31942e-16	1.15663	1.117-1.197	3.63214e-47	1.1874	1.160-1.215	++	94.5	18.105	2.09e-05
DQA1	47_Q	2.31942e-16	1.15663	1.117-1.197	3.63214e-47	1.1874	1.160-1.215	++	94.5	18.105	2.09e-05
DQA1	56_R	2.31942e-16	1.15663	1.117-1.197	3.63214e-47	1.1874	1.160-1.215	++	94.5	18.105	2.09e-05
DQA1	76_V	2.31942e-16	1.15663	1.117-1.197	3.63214e-47	1.1874	1.160-1.215	++	94.5	18.105	2.09e-05
DQA1	207_M	0.18425	0.975145	0.939-1.012	1.2309e-13	0.908006	0.885-0.931	--	94.5	18.086	2.11e-05
DQB1	125_G	5.71717e-05	0.930687	0.898-0.963	1.43956e-22	0.888	0.867-0.909	--	93.7	15.892	6.71e-05
DQA1	175_E	3.92885e-10	1.09993	1.067-1.133	2.8593e-33	1.131	1.108-1.153	++	93.6	15.688	7.47e-05
DRB1	180_V	2.25433e-14	0.87396	0.844-0.904	4.30498e-41	0.852894	0.833-0.872	--	93.6	15.678	7.51e-05
DRB1	-24_L	9.45973e-14	0.878709	0.849-0.909	4.48203e-39	0.858516	0.839-0.878	--	93.3	14.865	0.0001155
DRB1	104_S	1.47341e-12	0.896201	0.869-0.923	7.50469e-36	0.877852	0.860-0.895	--	92.7	13.792	0.0002043

## Sheet: S5
Table S5. HLA Amino Acid Polymorphism Associations
Results for COA and AOA are shown for amino acids (freq > 1%); associations that are genome-wide significance are shown in bold font, [childhood-onset in blue, and adult-onset in red]. For each amino acid, the locus is specified (A, B, C, DQA1, DQB1, DRB1), then the position along the protein. For biallelic positions, the reference then the alternative AA is listed. For multiallelic positions, on…
		Childhood-Onset Asthma					Adult-Onset Asthma
HLA	Amino Acid	p-value	OR	CI	beta	SE	p-value	OR	CI	beta	SE
HLA-A	-22_V	0.908009	0.985633	0.771-1.259	-0.0144716	0.12524	0.761681	1.02634	0.867-1.214	0.0260021	0.0857378
HLA-A	-20_A	0.847766	0.976539	0.766-1.244	-0.0237401	0.123666	0.798241	1.02192	0.865-1.206	0.0216812	0.0848167
HLA-A	-15_L	0.00277179	1.04559	1.015-1.076	0.0445844	0.0149013	0.827785	0.997823	0.978-1.017	-0.0021798	0.0100201
HLA-A	-15_V	0.00233904	0.955114	0.927-0.983	-0.0459247	0.0150898	0.794658	1.00264	0.982-1.022	0.00263983	0.0101428
HLA-A	-11_L	0.0263562	1.05262	1.006-1.101	0.0512851	0.0230918	0.0274234	1.03518	1.003-1.067	0.0345788	0.0156789
HLA-A	-11_S	0.0260894	0.950296	0.908-0.993	-0.0509823	0.0229146	0.0335396	0.967455	0.938-0.997	-0.0330864	0.0155659
HLA-A	-2_W	0.953606	0.993056	0.785-1.255	-0.00696846	0.119777	0.86588	1.01387	0.864-1.189	0.0137747	0.081558
HLA-A	9_F	0.14353	0.977409	0.947-1.007	-0.0228499	0.015621	0.614413	0.994696	0.974-1.015	-0.00531793	0.010556
HLA-A	9_S	0.223703	1.02891	0.982-1.077	0.0284981	0.0234216	0.566829	1.00915	0.978-1.041	0.00910525	0.015898
HLA-A	9_T	0.016062	1.06736	1.012-1.125	0.065185	0.0270757	0.0162572	1.04524	1.008-1.083	0.0442502	0.0184139
HLA-A	9_Y	0.372543	0.981257	0.941-1.022	-0.0189211	0.0212186	0.0916059	0.976131	0.949-1.003	-0.0241582	0.0143203
HLA-A	17_R_S	0.0113031	1.13284	1.028-1.247	0.124725	0.0492362	0.284017	0.962557	0.897-1.032	-0.0381618	0.0356207
HLA-A	44_R_K	0.0494234	1.03716	1.000-1.075	0.0364834	0.0185673	0.00933474	1.03307	1.008-1.058	0.032538	0.0125168
HLA-A	56_G	0.0506766	0.937083	0.877-1.000	-0.0649835	0.0332531	0.0317187	0.952674	0.911-0.995	-0.0484822	0.0225715
HLA-A	56_R	0.0386435	1.0727	1.003-1.146	0.0701783	0.0339359	0.0331227	1.05042	1.003-1.099	0.0491931	0.0230889
HLA-A	62_E	0.93187	1.00222	0.952-1.054	0.00221506	0.0259096	0.238828	1.02065	0.986-1.055	0.0204425	0.0173548
HLA-A	62_G	0.00630849	0.95565	0.925-0.987	-0.0453634	0.0166087	0.650584	0.994988	0.973-1.016	-0.00502412	0.011092
HLA-A	62_L	0.000873113	1.12246	1.048-1.201	0.115526	0.034708	0.46264	1.01806	0.970-1.067	0.0179006	0.0243709
HLA-A	62_Q	0.0607079	1.02824	0.998-1.058	0.0278465	0.0148466	0.735144	0.996621	0.977-1.016	-0.00338461	0.010005
HLA-A	62_R	0.155839	0.961825	0.911-1.014	-0.0389223	0.0274254	0.653519	0.991835	0.956-1.027	-0.00819891	0.0182653
HLA-A	63_E	0.423833	0.982664	0.941-1.025	-0.017488	0.0218658	0.913926	0.9984	0.969-1.027	-0.00160124	0.0148143
HLA-A	63_N	0.155839	0.961825	0.911-1.014	-0.0389223	0.0274254	0.653519	0.991835	0.956-1.027	-0.00819891	0.0182653
HLA-A	63_Q	0.000873113	1.12246	1.048-1.201	0.115526	0.034708	0.46264	1.01806	0.970-1.067	0.0179006	0.0243709
HLA-A	65_R_G	0.943705	1.00183	0.952-1.054	0.00183052	0.0259228	0.245131	1.02038	0.986-1.055	0.0201794	0.0173622
HLA-A	66_N_K	0.0118607	0.961841	0.933-0.991	-0.0389063	0.0154619	0.76627	1.00309	0.982-1.023	0.0030806	0.0103634
HLA-A	67_V_M	0.0494234	1.03716	1.000-1.075	0.0364834	0.0185673	0.00933474	1.03307	1.008-1.058	0.032538	0.0125168
HLA-A	70_H_Q	0.972082	0.999434	0.968-1.031	-0.000565821	0.0161676	0.000522763	0.962673	0.942-0.983	-0.0380415	0.0109667
HLA-A	73_T_I	0.902612	0.995047	0.918-1.077	-0.00496525	0.0405784	0.00831921	1.07247	1.018-1.129	0.0699631	0.0265129
HLA-A	74_D	0.0055016	1.04693	1.013-1.081	0.0458611	0.01652	0.689095	1.00442	0.982-1.026	0.00441433	0.0110335
HLA-A	74_H	0.00575794	0.955135	0.924-0.986	-0.045903	0.0166239	0.663599	0.995184	0.973-1.017	-0.00482785	0.0110998
HLA-A	76_A	0.000846341	1.05764	1.023-1.093	0.0560412	0.016793	0.00812872	1.03055	1.007-1.053	0.0300912	0.0113694
HLA-A	76_E	0.136926	1.03112	0.990-1.073	0.0306451	0.020604	0.440942	1.01083	0.983-1.038	0.0107723	0.0139791
HLA-A	76_V	5.95714e-05	0.941293	0.913-0.969	-0.0605006	0.0150705	0.00331173	0.970578	0.951-0.990	-0.0298635	0.0101673
HLA-A	77_D	5.95714e-05	0.941293	0.913-0.969	-0.0605006	0.0150705	0.00331173	0.970578	0.951-0.990	-0.0298635	0.0101673
HLA-A	77_N	0.000466988	1.05547	1.024-1.087	0.0539822	0.0154278	0.00470236	1.02989	1.009-1.051	0.029448	0.0104176
HLA-A	77_S	0.148135	1.04945	0.982-1.120	0.0482656	0.0333752	0.714844	1.00841	0.964-1.054	0.00837293	0.022917
HLA-A	79_G	0.361658	0.981147	0.941-1.022	-0.0190334	0.0208651	0.228895	0.983198	0.956-1.010	-0.0169443	0.0140826
HLA-A	79_R	0.327816	1.02104	0.979-1.064	0.020821	0.021278	0.227951	1.01747	0.989-1.046	0.0173216	0.014367
HLA-A	80_T_I	0.327816	1.02104	0.979-1.064	0.020821	0.021278	0.227951	1.01747	0.989-1.046	0.0173216	0.014367
HLA-A	81_L_A	0.327816	1.02104	0.979-1.064	0.020821	0.021278	0.227951	1.01747	0.989-1.046	0.0173216	0.014367
HLA-A	82_R_L	0.327816	1.02104	0.979-1.064	0.020821	0.021278	0.227951	1.01747	0.989-1.046	0.0173216	0.014367
HLA-A	83_G_R	0.327816	1.02104	0.979-1.064	0.020821	0.021278	0.227951	1.01747	0.989-1.046	0.0173216	0.014367
HLA-A	90_A_D	0.0233863	1.03741	1.004-1.070	0.0367279	0.0162006	0.206861	1.01394	0.992-1.035	0.0138389	0.0109637
HLA-A	95_I	0.0115662	1.0395	1.008-1.071	0.0387427	0.015343	0.759851	0.996861	0.976-1.017	-0.0031444	0.0102867
HLA-A	95_L	0.998722	1.00004	0.952-1.050	3.99602e-05	0.024954	0.393126	1.01439	0.981-1.048	0.0142913	0.0167352
HLA-A	95_V	0.00686698	0.955714	0.924-0.987	-0.0452961	0.0167563	0.796398	0.997119	0.975-1.019	-0.00288527	0.0111827
HLA-A	97_I	0.1147	1.02393	0.994-1.054	0.0236495	0.0149926	0.121464	0.98444	0.965-1.004	-0.0156823	0.0101264
HLA-A	97_M	0.356006	1.0163	0.981-1.051	0.0161717	0.0175207	0.0300245	1.02592	1.002-1.049	0.0255898	0.0117938
HLA-A	97_R	0.0138754	0.96147	0.931-0.992	-0.0392919	0.0159692	0.733595	0.996367	0.975-1.017	-0.00364009	0.0106952
HLA-A	99_F	0.944826	1.0018	0.952-1.054	0.00179403	0.025923	0.245915	1.02035	0.986-1.055	0.0201461	0.0173624
HLA-A	99_Y	0.988743	0.999641	0.951-1.050	-0.000358724	0.0254247	0.239966	0.980195	0.948-1.013	-0.0200038	0.0170235
HLA-A	105_S_P	0.0443021	1.03207	1.000-1.064	0.0315639	0.0156939	0.20025	1.01368	0.992-1.034	0.0135831	0.0106048
HLA-A	107_G_W	0.00647743	0.955798	0.925-0.987	-0.0452083	0.0166049	0.668319	0.99526	0.973-1.017	-0.00475126	0.0110892
HLA-A	109_F_L	0.746357	1.01306	0.936-1.095	0.0129715	0.0401039	0.782125	1.00754	0.955-1.062	0.00751257	0.0271652
HLA-A	114_E	0.0139788	1.12949	1.024-1.244	0.121762	0.0495411	0.338114	0.966355	0.901-1.036	-0.0342236	0.0357277
HLA-A	114_H	0.00492312	0.957554	0.929-0.986	-0.0433729	0.0154241	0.738444	1.00346	0.983-1.023	0.00345078	0.0103343
HLA-A	114_Q	0.40685	1.02007	0.973-1.069	0.0198668	0.0239518	0.0701379	1.0296	0.997-1.062	0.0291658	0.0161046
HLA-A	114_R	0.121745	1.02322	0.993-1.053	0.022957	0.014835	0.236053	0.988218	0.969-1.007	-0.0118515	0.0100021
HLA-A	116_D	0.0406109	1.0315	1.001-1.062	0.0310103	0.0151456	0.945954	0.99931	0.979-1.019	-0.000689742	0.010175
HLA-A	116_H	0.0139788	1.12949	1.024-1.244	0.121762	0.0495411	0.338114	0.966355	0.901-1.036	-0.0342236	0.0357277
HLA-A	116_Y	0.00493144	0.957562	0.929-0.986	-0.0433645	0.0154241	0.737774	1.00347	0.983-1.023	0.00345995	0.0103343
HLA-A	127_N_K	0.000543941	0.948704	0.920-0.977	-0.0526586	0.0152275	0.918548	1.00104	0.981-1.021	0.00104397	0.0102088
HLA-A	142_I_T	0.000237919	0.942616	0.913-0.972	-0.0590965	0.016081	0.545024	0.993527	0.972-1.014	-0.00649437	0.0107303
HLA-A	144_K_Q	0.000762793	1.06503	1.026-1.104	0.0630035	0.0187179	0.113203	1.02043	0.995-1.046	0.0202248	0.0127685
HLA-A	145_R_H	0.000237919	0.942616	0.913-0.972	-0.0590965	0.016081	0.545024	0.993527	0.972-1.014	-0.00649437	0.0107303
HLA-A	149_A_T	0.201391	1.0487	0.974-1.128	0.0475471	0.037216	0.994087	1.00019	0.951-1.051	0.00018963	0.0255897
HLA-A	150_A_V	0.0494234	1.03716	1.000-1.075	0.0364834	0.0185673	0.00933474	1.03307	1.008-1.058	0.032538	0.0125168
HLA-A	151_H_R	0.00362193	1.0613	1.019-1.104	0.0594965	0.0204502	0.101711	1.02311	0.995-1.051	0.0228488	0.013961
HLA-A	152_A	0.0633282	1.03187	0.998-1.066	0.0313699	0.0168939	0.234892	1.01366	0.991-1.036	0.0135716	0.0114254
HLA-A	152_E	0.574764	0.989299	0.952-1.027	-0.0107591	0.0191767	0.00314877	0.962273	0.938-0.987	-0.0384575	0.013024
HLA-A	152_V	0.0814765	0.97429	0.946-1.003	-0.0260463	0.0149504	0.137975	1.01507	0.995-1.035	0.0149529	0.0100803
HLA-A	152_W	0.117024	1.11646	0.972-1.281	0.110167	0.0702866	0.947024	1.00331	0.910-1.106	0.0033059	0.0497545
HLA-A	156_L	0.167803	0.979494	0.951-1.008	-0.0207194	0.0150217	0.231543	0.987949	0.968-1.007	-0.012124	0.0101338
HLA-A	156_Q	0.766497	1.00645	0.964-1.050	0.00642531	0.0216369	0.440349	0.988749	0.960-1.017	-0.0113152	0.0146645
HLA-A	156_R	0.0494234	1.03716	1.000-1.075	0.0364834	0.0185673	0.00933474	1.03307	1.008-1.058	0.032538	0.0125168
HLA-A	156_W	0.515456	0.9826	0.931-1.035	-0.017553	0.0269894	0.501658	0.98788	0.953-1.023	-0.0121942	0.0181493
HLA-A	158_A_V	0.0494234	1.03716	1.000-1.075	0.0364834	0.0185673	0.00933474	1.03307	1.008-1.058	0.032538	0.0125168
HLA-A	161_E_D	0.295801	0.9782	0.938-1.019	-0.0220412	0.0210824	0.000784798	0.953031	0.926-0.980	-0.0481082	0.014326
HLA-A	163_R	0.0221575	1.03779	1.005-1.071	0.0370936	0.0162147	0.250503	1.01269	0.991-1.034	0.0126138	0.0109768
HLA-A	163_T	0.0245846	0.964283	0.934-0.995	-0.0363704	0.01618	0.239962	0.987215	0.966-1.008	-0.0128675	0.0109503
HLA-A	166_E_D	0.059406	1.03134	0.998-1.064	0.0308627	0.0163713	0.00246222	1.03393	1.011-1.056	0.0333664	0.0110195
HLA-A	167_W_G	0.059406	1.03134	0.998-1.064	0.0308627	0.0163713	0.00246222	1.03393	1.011-1.056	0.0333664	0.0110195
HLA-A	184_A	0.123646	0.97705	0.948-1.006	-0.0232171	0.0150795	0.94972	0.999361	0.979-1.019	-0.000639564	0.0101423
HLA-A	184_P	0.117884	1.02365	0.994-1.054	0.0233763	0.0149492	0.966263	1.00043	0.980-1.020	0.000425364	0.0100571
HLA-A	186_K	0.0889849	1.16192	0.977-1.381	0.150076	0.0882398	0.210263	1.0749	0.960-1.203	0.072225	0.0576488
HLA-A	193_A	0.109242	0.976282	0.948-1.005	-0.0240038	0.0149873	0.351825	1.00944	0.989-1.029	0.00939125	0.0100867
HLA-A	193_P	0.103793	1.02449	0.995-1.054	0.0241959	0.0148739	0.34496	0.990588	0.971-1.010	-0.00945686	0.0100135
HLA-A	194_I	0.103793	1.02449	0.995-1.054	0.0241959	0.0148739	0.34496	0.990588	0.971-1.010	-0.00945686	0.0100135
HLA-A	194_V	0.109242	0.976282	0.948-1.005	-0.0240038	0.0149873	0.351825	1.00944	0.989-1.029	0.00939125	0.0100867
HLA-A	207_G	0.105631	1.02436	0.994-1.054	0.0240674	0.0148734	0.340291	0.990497	0.971-1.010	-0.00954858	0.0100133
HLA-A	207_S	0.11117	0.976409	0.948-1.005	-0.0238733	0.0149868	0.347062	1.00953	0.989-1.029	0.00948432	0.0100864
HLA-A	245_A	0.00911156	1.11047	1.026-1.201	0.104788	0.0401818	0.684563	1.01063	0.960-1.063	0.0105769	0.0260357
HLA-A	245_V	0.00979692	0.898422	0.828-0.974	-0.107116	0.0414708	0.637369	0.987446	0.936-1.040	-0.0126333	0.0268006
HLA-A	246_A	0.0128203	0.951003	0.914-0.989	-0.0502376	0.0201861	0.0372553	0.971859	0.946-0.998	-0.0285444	0.0137038
HLA-A	246_S	0.00990983	1.05423	1.012-1.097	0.0528063	0.0204758	0.0369292	1.02945	1.001-1.057	0.0290223	0.0139093
HLA-A	253_E	0.105631	1.02436	0.994-1.054	0.0240674	0.0148734	0.340291	0.990497	0.971-1.010	-0.00954858	0.0100133
HLA-A	253_Q	0.109242	0.976282	0.948-1.005	-0.0240038	0.0149873	0.351825	1.00944	0.989-1.029	0.00939125	0.0100867
HLA-A	255_Q	0.7807	1.04157	0.781-1.387	0.0407244	0.146277	0.773817	0.972344	0.803-1.177	-0.0280454	0.097588
HLA-A	268_K	0.7807	1.04157	0.781-1.387	0.0407244	0.146277	0.773817	0.972344	0.803-1.177	-0.0280454	0.097588
HLA-A	276_L	0.110924	1.02419	0.994-1.054	0.023906	0.014997	0.101799	0.983561	0.964-1.003	-0.0165756	0.0101306
HLA-A	276_P	0.104649	0.975746	0.947-1.005	-0.0245528	0.0151306	0.0908955	1.01743	0.997-1.038	0.0172752	0.0102178
HLA-A	282_I	0.925559	0.997639	0.949-1.048	-0.00236367	0.0252979	0.285882	0.982059	0.949-1.015	-0.0181035	0.0169636
HLA-A	282_V	0.943705	1.00183	0.952-1.054	0.00183052	0.0259228	0.245131	1.02038	0.986-1.055	0.0201794	0.0173622
HLA-A	283_H	0.738675	1.0192	0.911-1.139	0.019019	0.0570101	0.943093	1.00276	0.929-1.081	0.00275822	0.0386397
HLA-A	283_P	0.720759	0.981445	0.885-1.087	-0.0187295	0.0523984	0.940361	1.00267	0.935-1.075	0.00266396	0.0356067
HLA-A	288_I	0.908009	0.985633	0.771-1.259	-0.0144716	0.12524	0.761681	1.02634	0.867-1.214	0.0260021	0.0857378
HLA-A	294_F	0.0982714	0.975527	0.947-1.004	-0.0247771	0.0149865	0.321633	1.01005	0.990-1.030	0.00999601	0.0100857
HLA-A	294_L	0.103793	1.02449	0.995-1.054	0.0241959	0.0148739	0.34496	0.990588	0.971-1.010	-0.00945686	0.0100135
HLA-A	297_M	0.754426	1.01263	0.936-1.095	0.0125538	0.0401325	0.771928	1.00791	0.955-1.063	0.00787654	0.0271742
HLA-A	297_V	0.735785	0.987095	0.915-1.064	-0.0129888	0.0384922	0.861249	0.995448	0.945-1.047	-0.00456241	0.0261031
HLA-A	298_F	0.0263562	1.05262	1.006-1.101	0.0512851	0.0230918	0.0274234	1.03518	1.003-1.067	0.0345788	0.0156789
HLA-A	298_I	0.0260894	0.950296	0.908-0.993	-0.0509823	0.0229146	0.0335396	0.967455	0.938-0.997	-0.0330864	0.0155659
HLA-A	299_A	0.00973252	1.05435	1.012-1.097	0.052929	0.0204739	0.0352002	1.02972	1.002-1.058	0.0292891	0.0139071
HLA-A	299_T	0.0104975	0.949805	0.913-0.988	-0.0514985	0.0201245	0.0439293	0.972829	0.947-0.999	-0.027547	0.0136726
HLA-A	307_M	0.0260894	0.950296	0.908-0.993	-0.0509823	0.0229146	0.0335396	0.967455	0.938-0.997	-0.0330864	0.0155659
HLA-A	307_R	0.0263562	1.05262	1.006-1.101	0.0512851	0.0230918	0.0274234	1.03518	1.003-1.067	0.0345788	0.0156789
HLA-A	310_R	0.847766	0.976539	0.766-1.244	-0.0237401	0.123666	0.798241	1.02192	0.865-1.206	0.0216812	0.0848167
HLA-A	311_K	0.925559	0.997639	0.949-1.048	-0.00236367	0.0252979	0.285882	0.982059	0.949-1.015	-0.0181035	0.0169636
HLA-A	311_N	0.943705	1.00183	0.952-1.054	0.00183052	0.0259228	0.245131	1.02038	0.986-1.055	0.0201794	0.0173622
HLA-A	314_D	0.847766	0.976539	0.766-1.244	-0.0237401	0.123666	0.798241	1.02192	0.865-1.206	0.0216812	0.0848167
HLA-A	321_S	0.104649	0.975746	0.947-1.005	-0.0245528	0.0151306	0.0908955	1.01743	0.997-1.038	0.0172752	0.0102178
HLA-A	321_T	0.110924	1.02419	0.994-1.054	0.023906	0.014997	0.101799	0.983561	0.964-1.003	-0.0165756	0.0101306
HLA-A	334_M	0.0100609	1.05412	1.012-1.097	0.0527079	0.0204792	0.0362986	1.02955	1.001-1.058	0.0291225	0.0139105
HLA-A	334_V	0.0108431	0.950009	0.913-0.988	-0.051284	0.0201294	0.0452335	0.972986	0.947-0.999	-0.0273853	0.0136757
HLA-B	-23_L	0.337911	1.01501	0.984-1.046	0.0148972	0.0155454	0.480867	0.992629	0.972-1.013	-0.00739879	0.0104961
HLA-B	-23_R	0.620833	0.992285	0.962-1.023	-0.0077447	0.0156563	0.477556	1.00753	0.986-1.028	0.00749791	0.0105569
HLA-B	-21_M	0.337911	1.01501	0.984-1.046	0.0148972	0.0155454	0.480867	0.992629	0.972-1.013	-0.00739879	0.0104961
HLA-B	-21_T	0.620833	0.992285	0.962-1.023	-0.0077447	0.0156563	0.477556	1.00753	0.986-1.028	0.00749791	0.0105569
HLA-B	-16_L	3.52652e-07	1.08385	1.050-1.117	0.0805212	0.0158105	0.0328422	1.02322	1.001-1.045	0.0229561	0.0107573
HLA-B	-16_V	4.53817e-06	0.930333	0.902-0.959	-0.0722127	0.0157495	0.0340596	0.977592	0.957-0.998	-0.0226629	0.0106933
HLA-B	-11_S	0.0943351	1.02532	0.995-1.055	0.0250036	0.0149457	0.128339	1.01543	0.995-1.035	0.0153098	0.0100677
HLA-B	-11_W	0.216295	0.981525	0.952-1.010	-0.0186482	0.0150821	0.125274	0.984547	0.965-1.004	-0.0155735	0.0101588
HLA-B	-10_A	0.701072	1.00576	0.976-1.035	0.00574819	0.0149742	0.336733	0.990348	0.970-1.010	-0.00969923	0.0100966
HLA-B	-10_G	0.947714	1.00099	0.971-1.031	0.00099347	0.0151495	0.33078	1.00998	0.989-1.030	0.00992825	0.0102085
HLA-B	-8_L	0.187112	1.01998	0.990-1.050	0.0197863	0.0149991	0.299021	1.01054	0.990-1.030	0.0104893	0.0101001
HLA-B	-8_V	0.380124	0.986811	0.957-1.016	-0.0132767	0.0151272	0.29547	0.989399	0.969-1.009	-0.0106576	0.010187
HLA-B	9_D	3.21499e-06	1.09982	1.056-1.144	0.0951475	0.0204329	9.194e-10	1.0884	1.059-1.118	0.0847085	0.0138349
HLA-B	9_H	0.0909331	0.968005	0.932-1.005	-0.0325179	0.0192357	0.165315	0.982251	0.957-1.007	-0.0179079	0.0129074
HLA-B	9_Y	0.102575	0.974597	0.944-1.005	-0.0257308	0.0157617	0.000596214	0.964232	0.944-0.984	-0.0364232	0.0106087
HLA-B	11_A_S	0.00263283	0.950846	0.920-0.982	-0.0504034	0.0167584	3.74876e-08	0.939696	0.919-0.960	-0.0621994	0.0113043
HLA-B	12_M_V	0.000739245	0.94637	0.916-0.977	-0.0551221	0.0163344	2.72155e-10	0.93278	0.912-0.953	-0.0695858	0.0110211
HLA-B	24_A	5.78724e-09	0.899937	0.868-0.932	-0.105431	0.0181066	0.0502225	0.976844	0.954-1.000	-0.0234279	0.0119648
HLA-B	24_S	0.402991	1.01277	0.983-1.043	0.0126877	0.0151714	0.17695	0.986271	0.966-1.006	-0.0138242	0.0102386
HLA-B	24_T	1.53559e-06	1.07804	1.045-1.111	0.0751402	0.0156329	0.00151329	1.0342	1.012-1.055	0.0336263	0.0106006
HLA-B	30_D_G	0.738249	1.01325	0.937-1.094	0.0131602	0.0393815	0.166159	0.963099	0.913-1.015	-0.037599	0.0271541
HLA-B	32_Q_L	1.0005e-06	1.08066	1.047-1.114	0.0775708	0.0158582	0.00475542	1.03087	1.009-1.052	0.0304034	0.0107693
HLA-B	41_A_T	5.8665e-09	1.09818	1.064-1.133	0.0936517	0.0160899	0.000912872	1.03702	1.014-1.059	0.0363537	0.0109628
HLA-B	45_E	0.772212	0.995622	0.966-1.025	-0.00438732	0.0151558	0.290656	0.989269	0.969-1.009	-0.0107887	0.0102099
HLA-B	45_K	3.30242e-09	1.10183	1.066-1.137	0.0969699	0.0163916	0.00287943	1.03392	1.011-1.056	0.0333598	0.0111933
HLA-B	45_M	0.839137	1.00458	0.961-1.049	0.00456833	0.0225043	0.14977	1.02197	0.992-1.052	0.021728	0.0150853
HLA-B	45_T	1.13536e-10	0.871105	0.835-0.908	-0.137993	0.0214018	0.000450652	0.952004	0.926-0.978	-0.0491858	0.0140191
HLA-B	46_E_A	0.839137	1.00458	0.961-1.049	0.00456833	0.0225043	0.14977	1.02197	0.992-1.052	0.021728	0.0150853
HLA-B	62_R_G	0.000430183	0.875373	0.812-0.942	-0.133106	0.0378051	1.09522e-05	0.89511	0.851-0.940	-0.110809	0.0251984
HLA-B	63_N_E	7.35728e-05	1.06113	1.030-1.092	0.0593368	0.0149673	0.00110954	1.03345	1.013-1.054	0.032901	0.0100887
HLA-B	65_Q_R	0.000139152	0.868145	0.807-0.933	-0.141396	0.0371151	3.53298e-06	0.891846	0.849-0.936	-0.114462	0.0246838
HLA-B	66_I	5.66681e-06	1.17214	1.094-1.255	0.158831	0.0349968	1.12883e-05	1.10646	1.057-1.157	0.101162	0.0230391
HLA-B	66_N	0.000139152	0.868145	0.807-0.933	-0.141396	0.0371151	3.53298e-06	0.891846	0.849-0.936	-0.114462	0.0246838
HLA-B	67_C	0.00129319	0.9216	0.876-0.968	-0.0816436	0.025375	0.0299016	0.964249	0.933-0.996	-0.036406	0.0167662
HLA-B	67_F	0.288771	0.981653	0.948-1.015	-0.0185171	0.0174554	0.00254736	1.03568	1.012-1.059	0.0350551	0.0116167
HLA-B	67_M	0.000139152	0.868145	0.807-0.933	-0.141396	0.0371151	3.53298e-06	0.891846	0.849-0.936	-0.114462	0.0246838
HLA-B	67_S	4.44383e-11	1.10452	1.072-1.137	0.0994072	0.0150881	1.00533e-06	1.05116	1.030-1.072	0.0498921	0.0102017
HLA-B	67_Y	0.040635	0.960012	0.923-0.998	-0.0408091	0.0199338	7.42835e-08	0.929835	0.905-0.954	-0.0727479	0.0135207
HLA-B	69_A	7.32676e-06	0.925434	0.894-0.957	-0.077493	0.0172822	4.72433e-12	0.922776	0.901-0.944	-0.0803688	0.0116247
HLA-B	69_T	7.33542e-07	1.089	1.052-1.126	0.0852597	0.0172163	5.43272e-12	1.08293	1.058-1.107	0.0796735	0.0115573
HLA-B	70_K	0.052529	0.927456	0.859-1.000	-0.0753098	0.0388441	0.946482	0.998301	0.949-1.049	-0.00170034	0.0253307
HLA-B	70_N	7.33542e-07	1.089	1.052-1.126	0.0852597	0.0172163	5.43272e-12	1.08293	1.058-1.107	0.0796735	0.0115573
HLA-B	70_Q	0.0421046	0.960291	0.923-0.998	-0.0405187	0.0199355	8.03208e-08	0.930006	0.905-0.954	-0.0725646	0.013522
HLA-B	70_S	0.000139152	0.868145	0.807-0.933	-0.141396	0.0371151	3.53298e-06	0.891846	0.849-0.936	-0.114462	0.0246838
HLA-B	71_T_A	7.45905e-06	0.925496	0.894-0.957	-0.0774253	0.0172818	4.88004e-12	0.922827	0.902-0.944	-0.0803137	0.0116245
HLA-B	74_Y_D	0.93307	0.998725	0.969-1.028	-0.00127544	0.015187	0.297745	0.9894	0.969-1.009	-0.0106569	0.0102344
HLA-B	77_D	0.0372105	0.933068	0.874-0.995	-0.0692768	0.033251	0.674997	0.99089	0.949-1.034	-0.00915131	0.0218253
HLA-B	77_N	0.0013554	1.05287	1.020-1.086	0.0515242	0.0160813	0.127761	1.01674	0.995-1.038	0.0165965	0.0108973
HLA-B	77_S	0.114118	0.975862	0.946-1.005	-0.0244346	0.0154654	0.210775	0.987034	0.967-1.007	-0.0130509	0.0104287
HLA-B	80_I	3.23502e-06	0.891864	0.849-0.935	-0.114442	0.0245831	0.00533871	0.955992	0.926-0.986	-0.0450055	0.016155
HLA-B	80_N	0.107531	0.975417	0.946-1.005	-0.0248898	0.0154654	0.216606	0.987196	0.967-1.007	-0.0128867	0.0104295
HLA-B	80_T	1.33243e-08	1.10042	1.064-1.137	0.0956944	0.0168421	0.000638238	1.04002	1.016-1.063	0.0392419	0.0114916
HLA-B	81_L_A	0.0013554	1.05287	1.020-1.086	0.0515242	0.0160813	0.127761	1.01674	0.995-1.038	0.0165965	0.0108973
HLA-B	82_R_L	0.0388002	1.03253	1.001-1.064	0.0320156	0.0154942	0.210041	1.0132	0.992-1.034	0.0131106	0.0104596
HLA-B	83_G_R	0.0388002	1.03253	1.001-1.064	0.0320156	0.0154942	0.210041	1.0132	0.992-1.034	0.0131106	0.0104596
HLA-B	94_T_I	0.371339	1.01494	0.982-1.048	0.0148258	0.0165843	0.192445	0.985464	0.964-1.007	-0.0146432	0.0112348
HLA-B	95_I	0.471954	1.01184	0.979-1.044	0.01177	0.0163631	0.113879	0.98264	0.961-1.004	-0.0175126	0.0110769
HLA-B	95_L	0.173761	1.02082	0.990-1.051	0.0206083	0.0151508	0.289369	1.01086	0.990-1.031	0.010803	0.0101963
HLA-B	95_W	0.0163864	0.945418	0.903-0.989	-0.056128	0.0233848	0.531119	1.00969	0.979-1.040	0.00964603	0.0154016
HLA-B	97_N	0.0698614	0.931966	0.863-1.005	-0.070459	0.0388673	0.901543	0.996861	0.948-1.047	-0.00314399	0.0254137
HLA-B	97_R	0.0131664	1.03807	1.007-1.069	0.0373652	0.0150713	0.0490818	1.02019	1.000-1.040	0.0199919	0.0101591
HLA-B	97_S	0.0260407	1.03626	1.004-1.069	0.035621	0.0160051	0.501881	1.0073	0.986-1.028	0.00727483	0.0108332
HLA-B	97_T	0.0089544	0.932867	0.885-0.982	-0.0694928	0.026587	0.51706	1.01133	0.977-1.046	0.0112617	0.0173822
HLA-B	97_V	0.000955304	0.876048	0.809-0.947	-0.132335	0.0400605	9.71693e-06	0.888298	0.842-0.936	-0.118448	0.0267776
HLA-B	97_W	0.144198	0.942683	0.870-1.020	-0.0590248	0.0404186	0.00276807	0.92138	0.873-0.972	-0.0818827	0.0273637
HLA-B	99_S	0.511463	0.95803	0.842-1.088	-0.042876	0.0653038	0.242121	0.949711	0.871-1.035	-0.0515976	0.0441118
HLA-B	99_Y	0.0512587	1.1035	0.999-1.218	0.098491	0.0505262	0.633882	1.01588	0.952-1.083	0.0157515	0.0330726
HLA-B	103_L	6.99494e-10	0.867918	0.829-0.907	-0.141658	0.0229733	0.000742642	0.950681	0.923-0.979	-0.0505771	0.0149932
HLA-B	103_V	3.8625e-11	1.15776	1.108-1.209	0.146488	0.022164	0.0011076	1.04827	1.018-1.078	0.0471453	0.0144544
HLA-B	113_H_Y	2.59642e-06	1.07858	1.045-1.113	0.0756486	0.0160941	0.152491	1.0158	0.994-1.037	0.0156784	0.0109579
HLA-B	114_D	0.191361	1.01984	0.990-1.050	0.0196468	0.015037	0.00929525	0.974012	0.954-0.993	-0.0263315	0.0101236
HLA-B	114_H	0.0371389	0.925929	0.861-0.995	-0.0769579	0.0369238	0.838568	0.995099	0.949-1.043	-0.00491303	0.0241159
HLA-B	114_N	0.994955	1.0001	0.970-1.030	9.62611e-05	0.0152241	0.00622253	1.02841	1.007-1.049	0.0280181	0.0102412
HLA-B	116_D	8.5321e-10	1.11376	1.076-1.152	0.107742	0.0175628	0.00119718	1.0398	1.015-1.064	0.0390254	0.0120465
HLA-B	116_F	0.0185585	0.936153	0.886-0.989	-0.0659765	0.028024	0.00221899	0.944154	0.910-0.979	-0.0574665	0.0187846
HLA-B	116_L	0.491315	0.979753	0.924-1.038	-0.020455	0.0297216	0.795908	0.994869	0.956-1.034	-0.0051441	0.0198885
HLA-B	116_S	6.5327e-06	0.917247	0.883-0.952	-0.0863788	0.0191596	0.0194273	0.97072	0.946-0.995	-0.0297176	0.0127149
HLA-B	116_Y	0.548392	1.0091	0.979-1.039	0.00906115	0.0150976	0.311342	1.01035	0.990-1.030	0.0102991	0.0101729
HLA-B	131_S_R	0.109251	1.02491	0.994-1.056	0.0246023	0.0153614	0.644338	1.0048	0.984-1.025	0.00479167	0.0103796
HLA-B	143_T_S	0.263616	0.964232	0.904-1.027	-0.0364233	0.0325823	0.633573	0.989675	0.948-1.032	-0.0103784	0.0217712
HLA-B	145_R_L	0.931234	1.00466	0.903-1.116	0.00465092	0.0538976	0.193985	1.04723	0.976-1.122	0.0461461	0.0355276
HLA-B	147_W_L	0.263616	0.964232	0.904-1.027	-0.0364233	0.0325823	0.633573	0.989675	0.948-1.032	-0.0103784	0.0217712
HLA-B	152_V_E	0.0368881	0.96738	0.937-0.997	-0.0331639	0.0158907	0.0178631	0.975026	0.954-0.995	-0.0252914	0.0106785
HLA-B	156_D	4.5609e-16	1.13924	1.103-1.175	0.130363	0.0160493	4.13032e-11	1.07483	1.052-1.098	0.0721671	0.0109355
HLA-B	156_L	3.08468e-13	0.895374	0.869-0.922	-0.110513	0.0151582	1.80788e-06	0.952507	0.933-0.971	-0.0486579	0.0101927
HLA-B	156_R	0.0776623	0.96368	0.924-1.004	-0.0369962	0.020968	1.94637e-07	0.928493	0.902-0.954	-0.0741922	0.0142557
HLA-B	156_W	0.00161319	1.09785	1.035-1.163	0.0933549	0.0296035	2.88967e-07	1.10777	1.065-1.151	0.102346	0.0199486
HLA-B	158_A_T	0.0315095	0.891129	0.802-0.989	-0.115267	0.0535979	0.394117	0.970828	0.906-1.039	-0.0296057	0.0347414
HLA-B	163_E	0.00572066	0.954743	0.923-0.986	-0.0463131	0.0167596	0.000200181	0.958954	0.938-0.980	-0.0419117	0.0112703
HLA-B	163_L	0.248692	1.0177	0.987-1.048	0.0175478	0.0152122	0.0924352	1.01739	0.997-1.038	0.0172433	0.0102474
HLA-B	163_T	0.0463044	1.03347	1.000-1.067	0.0329198	0.016521	0.0569501	1.02146	0.999-1.044	0.0212358	0.011155
HLA-B	167_S	1.28254e-15	1.16004	1.118-1.203	0.148456	0.0185657	0.000201015	1.04907	1.022-1.075	0.0479016	0.0128846
HLA-B	167_W	1.67655e-13	0.872384	0.841-0.904	-0.136525	0.0185186	0.000243585	0.954157	0.930-0.978	-0.046927	0.0127904
HLA-B	171_Y_H	0.0464839	0.954035	0.910-0.999	-0.0470549	0.0236341	0.0628256	0.970977	0.941-1.001	-0.0294523	0.015831
HLA-B	177_E_D	0.0978405	1.02587	0.995-1.057	0.0255397	0.015428	0.656129	1.00465	0.984-1.025	0.00464248	0.0104264
HLA-B	178_T_K	0.0365243	0.961974	0.927-0.997	-0.0387679	0.01854	2.73281e-06	0.942873	0.919-0.966	-0.0588236	0.0125425
HLA-B	180_Q_E	0.0978405	1.02587	0.995-1.057	0.0255397	0.015428	0.656129	1.00465	0.984-1.025	0.00464248	0.0104264
HLA-B	194_I	4.65161e-15	1.2114	1.154-1.270	0.191777	0.0244739	0.00676097	1.04332	1.011-1.075	0.0424084	0.0156581
HLA-B	194_V	5.42977e-14	0.823406	0.782-0.866	-0.194306	0.0258347	0.00462286	0.954361	0.924-0.985	-0.0467132	0.0164936
HLA-B	199_A	1.51564e-12	0.875618	0.843-0.908	-0.132825	0.018779	0.00027125	0.953893	0.929-0.978	-0.0472043	0.0129635
HLA-B	199_V	1.07975e-14	1.15678	1.114-1.200	0.145641	0.0188422	0.000225531	1.0494	1.022-1.076	0.0482216	0.0130733
HLA-B	211_A	0.00812216	1.27834	1.065-1.533	0.245562	0.0927718	0.935364	1.00482	0.894-1.128	0.00480932	0.059303
HLA-B	239_R	0.00530128	1.29304	1.079-1.549	0.256996	0.0921748	0.996168	0.999718	0.891-1.121	-0.000281704	0.0586558
HLA-B	245_A	0.0103556	1.26381	1.056-1.511	0.234127	0.0913232	0.842158	1.01172	0.902-1.134	0.0116537	0.0585221
HLA-B	253_E	0.00530128	1.29304	1.079-1.549	0.256996	0.0921748	0.996168	0.999718	0.891-1.121	-0.000281704	0.0586558
HLA-B	267_P	0.00530128	1.29304	1.079-1.549	0.256996	0.0921748	0.996168	0.999718	0.891-1.121	-0.000281704	0.0586558
HLA-B	268_K	0.00530128	1.29304	1.079-1.549	0.256996	0.0921748	0.996168	0.999718	0.891-1.121	-0.000281704	0.0586558
HLA-B	270_L	0.00530128	1.29304	1.079-1.549	0.256996	0.0921748	0.996168	0.999718	0.891-1.121	-0.000281704	0.0586558
HLA-B	275_E	0.00438282	1.29712	1.084-1.551	0.260146	0.0913047	0.994314	1.00041	0.892-1.120	0.000413025	0.0579531
HLA-B	282_I	1.28013e-05	0.928414	0.897-0.959	-0.0742777	0.0170226	0.492993	0.992262	0.970-1.014	-0.00776775	0.0113306
HLA-B	282_V	1.91161e-06	1.08225	1.047-1.118	0.0790445	0.0165971	0.495429	1.00756	0.985-1.029	0.00753036	0.0110464
HLA-B	295_A	0.00438282	1.29712	1.084-1.551	0.260146	0.0913047	0.994314	1.00041	0.892-1.120	0.000413025	0.0579531
HLA-B	296_V	0.00438282	1.29712	1.084-1.551	0.260146	0.0913047	0.994314	1.00041	0.892-1.120	0.000413025	0.0579531
HLA-B	298_V	0.00438282	1.29712	1.084-1.551	0.260146	0.0913047	0.994314	1.00041	0.892-1.120	0.000413025	0.0579531
HLA-B	299_I	0.00438282	1.29712	1.084-1.551	0.260146	0.0913047	0.994314	1.00041	0.892-1.120	0.000413025	0.0579531
HLA-B	300_G	0.00438282	1.29712	1.084-1.551	0.260146	0.0913047	0.994314	1.00041	0.892-1.120	0.000413025	0.0579531
HLA-B	305_A	3.97823e-06	1.07965	1.045-1.115	0.0766386	0.0166154	0.534883	1.00689	0.985-1.028	0.00686548	0.0110632
HLA-B	305_T	2.56296e-05	0.93078	0.900-0.962	-0.0717325	0.0170419	0.53335	0.992956	0.971-1.015	-0.00706914	0.0113488
HLA-B	307_M	0.0119801	1.21405	1.043-1.412	0.193966	0.0771933	0.555302	0.971534	0.882-1.069	-0.0288787	0.0489607
HLA-B	325_C	1.61941e-08	1.09305	1.059-1.127	0.0889743	0.0157521	0.0422515	1.02161	1.000-1.042	0.0213794	0.0105264
HLA-B	325_S	1.24459e-07	0.918249	0.889-0.947	-0.085287	0.016132	0.0388361	0.97798	0.957-0.998	-0.0222662	0.0107779
HLA-C	-17_A	0.0182018	1.03704	1.006-1.068	0.0363708	0.0154016	0.519534	1.00673	0.986-1.027	0.00670369	0.0104084
HLA-C	-17_T	0.0185185	0.964358	0.935-0.993	-0.0362925	0.0154103	0.529889	0.99348	0.973-1.013	-0.00654172	0.0104138
HLA-C	-15_I	0.0241381	0.966703	0.938-0.995	-0.0338636	0.0150176	0.145966	0.985373	0.965-1.005	-0.0147352	0.0101347
HLA-C	-15_L	0.0234668	1.03466	1.004-1.065	0.0340764	0.0150398	0.141018	1.01505	0.995-1.035	0.0149412	0.0101502
HLA-C	-9_A	0.0155491	0.963279	0.934-0.992	-0.0374118	0.0154637	0.482967	0.992695	0.972-1.013	-0.00733202	0.0104514
HLA-C	-9_G	0.0154085	1.0381	1.007-1.069	0.037394	0.0154353	0.473662	1.0075	0.987-1.028	0.00747524	0.0104325
HLA-C	1_C	0.000267632	1.06767	1.030-1.105	0.0654816	0.0179659	0.581988	1.00659	0.983-1.030	0.00657198	0.0119386
HLA-C	1_G	0.000254312	0.936011	0.903-0.969	-0.0661281	0.0180783	0.592537	0.993593	0.970-1.017	-0.00642749	0.0120103
HLA-C	6_R_K	3.50798e-06	0.81217	0.743-0.886	-0.208046	0.0448512	0.0962535	0.954539	0.903-1.008	-0.0465272	0.0279729
HLA-C	9_D	0.291391	1.01585	0.986-1.045	0.0157214	0.0149007	0.411902	0.991792	0.972-1.011	-0.00824228	0.0100448
HLA-C	9_F	3.50798e-06	0.81217	0.743-0.886	-0.208046	0.0448512	0.0962535	0.954539	0.903-1.008	-0.0465272	0.0279729
HLA-C	9_S	1.54245e-13	0.815375	0.772-0.860	-0.204107	0.0276438	4.65688e-05	0.930651	0.899-0.963	-0.0718705	0.017649
HLA-C	9_Y	6.01861e-07	1.07737	1.046-1.109	0.074521	0.0149322	0.000118368	1.03955	1.019-1.060	0.0387921	0.0100772
HLA-C	11_A_S	3.12118e-19	0.805879	0.768-0.844	-0.215822	0.0240756	8.39181e-06	0.934016	0.906-0.962	-0.0682617	0.0153227
HLA-C	14_R_W	6.15813e-12	0.819355	0.774-0.867	-0.199238	0.0289761	5.38826e-06	0.918847	0.885-0.952	-0.0846357	0.018605
HLA-C	16_G_S	0.643358	1.01836	0.942-1.099	0.0181935	0.039294	0.138657	1.03978	0.987-1.094	0.0390098	0.0263435
HLA-C	21_R_H	0.323426	1.01869	0.981-1.056	0.0185137	0.0187491	0.000161009	1.04853	1.023-1.074	0.0473898	0.0125588
HLA-C	24_A_S	0.525184	0.990626	0.962-1.019	-0.00941838	0.0148233	0.157937	0.986002	0.966-1.005	-0.0140966	0.00998314
HLA-C	35_R_Q	1.12627e-05	1.09264	1.050-1.136	0.0885996	0.0201757	0.952931	1.00083	0.973-1.028	0.00082524	0.0139808
HLA-C	49_A_E	6.15813e-12	0.819355	0.774-0.867	-0.199238	0.0289761	5.38826e-06	0.918847	0.885-0.952	-0.0846357	0.018605
HLA-C	66_K_N	0.00189471	1.0589	1.021-1.097	0.0572332	0.0184251	6.24063e-07	1.06379	1.038-1.089	0.0618376	0.0124082
HLA-C	73_T_A	0.000197404	0.946097	0.918-0.974	-0.0554102	0.0148859	0.00027429	0.964135	0.945-0.983	-0.036524	0.0100383
HLA-C	77_S_N	0.139637	0.977179	0.947-1.007	-0.0230856	0.0156285	0.0227477	0.976309	0.956-0.996	-0.0239766	0.0105269
HLA-C	80_N_K	0.139637	0.977179	0.947-1.007	-0.0230856	0.0156285	0.0227477	0.976309	0.956-0.996	-0.0239766	0.0105269
HLA-C	90_A_D	0.00580803	0.959994	0.932-0.988	-0.0408285	0.0148014	0.000870261	0.967352	0.948-0.986	-0.033193	0.0099696
HLA-C	91_G_R	0.690309	1.0129	0.951-1.078	0.0128138	0.0321602	0.00965926	1.05678	1.013-1.101	0.0552264	0.0213411
HLA-C	94_T_I	0.400748	1.01725	0.977-1.058	0.0171078	0.0203595	0.000822945	1.04666	1.019-1.074	0.0456005	0.0136326
HLA-C	95_F	0.00630745	1.15637	1.041-1.283	0.145286	0.0531919	0.142833	1.05612	0.981-1.136	0.0546047	0.0372646
HLA-C	95_I	0.429117	1.01611	0.976-1.057	0.0159785	0.020208	0.0009653	1.04566	1.018-1.073	0.0446499	0.0135284
HLA-C	95_L	0.0941955	0.968573	0.933-1.005	-0.0319313	0.0190786	0.000316297	0.954848	0.931-0.979	-0.0462031	0.0128286
HLA-C	97_R	0.0120267	1.04759	1.010-1.086	0.0464911	0.0185123	0.17272	1.017	0.992-1.041	0.0168613	0.012366
HLA-C	97_W	0.0122648	0.954733	0.920-0.989	-0.046324	0.0184968	0.181989	0.983648	0.960-1.007	-0.016487	0.012353
HLA-C	99_C	3.50798e-06	0.81217	0.743-0.886	-0.208046	0.0448512	0.0962535	0.954539	0.903-1.008	-0.0465272	0.0279729
HLA-C	99_F	2.07856e-13	0.816507	0.773-0.861	-0.20272	0.0276048	3.46022e-05	0.929548	0.897-0.962	-0.0730564	0.0176429
HLA-C	99_S	0.141521	0.970273	0.932-1.010	-0.0301778	0.020527	4.81027e-06	0.938248	0.912-0.964	-0.0637404	0.0139387
HLA-C	99_Y	6.68593e-15	1.14062	1.103-1.179	0.131574	0.0168896	1.77523e-12	1.08234	1.058-1.106	0.0791293	0.0112223
HLA-C	103_L_V	0.24004	1.02542	0.983-1.069	0.0250992	0.0213631	0.00178363	1.04583	1.016-1.075	0.0448085	0.014343
HLA-C	113_Y_H	0.454905	0.958577	0.857-1.071	-0.0423052	0.0566135	0.29657	1.03928	0.966-1.117	0.0385265	0.0369092
HLA-C	114_D	0.400844	1.01477	0.980-1.050	0.0146586	0.0174484	0.00221561	1.03678	1.013-1.061	0.0361218	0.0118057
HLA-C	114_N	0.403546	0.985522	0.952-1.019	-0.0145835	0.017459	0.00240749	0.964786	0.942-0.987	-0.0358488	0.0118128
HLA-C	116_F	0.908141	0.998044	0.965-1.031	-0.00195836	0.0169726	0.0103128	0.970936	0.949-0.993	-0.0294951	0.0114983
HLA-C	116_L	0.70866	0.978658	0.873-1.095	-0.0215728	0.0577344	0.220589	1.04748	0.972-1.128	0.0463865	0.0378676
HLA-C	116_S	0.289762	1.0159	0.986-1.046	0.0157783	0.0149043	0.725053	1.00354	0.983-1.023	0.00353081	0.0100389
HLA-C	116_Y	0.255374	0.977636	0.940-1.016	-0.0226183	0.0198861	0.0334304	1.02849	1.002-1.055	0.0280935	0.0132088
HLA-C	138_T_K	1.33273e-05	1.09188	1.049-1.135	0.087903	0.020186	0.921951	1.00137	0.974-1.029	0.00136996	0.0139825
HLA-C	147_W_L	0.018853	1.03684	1.006-1.068	0.0361736	0.0154034	0.495478	1.00712	0.986-1.027	0.00709493	0.0104089
HLA-C	152_A	1.40077e-05	1.06755	1.036-1.099	0.0653635	0.0150477	0.0680289	1.01874	0.998-1.039	0.018568	0.0101753
HLA-C	152_E	1.19465e-05	0.936095	0.908-0.964	-0.0660378	0.0150821	0.0751293	0.982013	0.962-1.001	-0.0181504	0.0101987
HLA-C	156_D	0.00630745	1.15637	1.041-1.283	0.145286	0.0531919	0.142833	1.05612	0.981-1.136	0.0546047	0.0372646
HLA-C	156_L	0.0298377	1.03281	1.003-1.063	0.0322824	0.0148614	0.00752564	1.02713	1.007-1.047	0.0267712	0.0100167
HLA-C	156_Q	7.07726e-06	1.16156	1.088-1.240	0.149766	0.0333454	0.0150294	1.05851	1.011-1.108	0.0568591	0.0233827
HLA-C	156_R	0.00147181	0.948134	0.917-0.979	-0.0532592	0.0167472	0.000998998	0.963726	0.942-0.985	-0.0369486	0.0112278
HLA-C	156_W	0.00950153	0.948196	0.910-0.987	-0.0531939	0.0205108	0.135958	0.979817	0.953-1.006	-0.0203896	0.013675
HLA-C	163_E	0.773998	1.01077	0.939-1.087	0.0107129	0.0373078	0.213909	1.03155	0.982-1.083	0.0310579	0.0249885
HLA-C	163_L	0.24004	1.02542	0.983-1.069	0.0250992	0.0213631	0.00178363	1.04583	1.016-1.075	0.0448085	0.014343
HLA-C	163_T	0.232925	0.977476	0.941-1.014	-0.022781	0.0190979	0.000681229	0.957394	0.933-0.981	-0.0435404	0.0128172
HLA-C	173_E_K	0.24004	1.02542	0.983-1.069	0.0250992	0.0213631	0.00178363	1.04583	1.016-1.075	0.0448085	0.014343
HLA-C	177_E_K	2.57208e-07	1.10429	1.063-1.146	0.099201	0.0192535	0.568401	1.00764	0.981-1.034	0.00761078	0.0133427
HLA-C	184_H	0.0191794	0.964548	0.935-0.994	-0.0360955	0.0154121	0.505569	0.993091	0.973-1.013	-0.00693341	0.0104144
HLA-C	184_P	0.0159719	1.0379	1.006-1.069	0.0371966	0.0154371	0.450734	1.0079	0.987-1.028	0.00786851	0.010433
HLA-C	193_L	3.35775e-06	1.16633	1.093-1.244	0.153859	0.0331048	0.0111158	1.06075	1.013-1.110	0.0589752	0.0232274
HLA-C	193_P	4.52442e-06	0.860092	0.806-0.917	-0.150715	0.0328663	0.0132124	0.944528	0.902-0.988	-0.0570701	0.0230308
HLA-C	194_L	0.0159719	1.0379	1.006-1.069	0.0371966	0.0154371	0.450734	1.0079	0.987-1.028	0.00786851	0.010433
HLA-C	194_V	0.0161176	0.96347	0.934-0.993	-0.0372139	0.0154656	0.459745	0.992303	0.972-1.012	-0.00772678	0.0104519
HLA-C	211_A	0.671485	0.98367	0.911-1.061	-0.0164646	0.0388215	0.155596	0.963704	0.915-1.014	-0.0369714	0.0260355
HLA-C	211_T	0.653371	1.01782	0.942-1.099	0.0176618	0.0393283	0.138604	1.03981	0.987-1.094	0.0390386	0.0263594
HLA-C	219_R	5.29837e-09	1.1054	1.068-1.143	0.100208	0.0171661	0.318798	1.01137	0.989-1.034	0.011307	0.0113418
HLA-C	219_W	4.96919e-09	0.904158	0.874-0.935	-0.100751	0.0172278	0.325848	0.988883	0.967-1.011	-0.0111795	0.0113785
HLA-C	248_M	3.50798e-06	0.81217	0.743-0.886	-0.208046	0.0448512	0.0962535	0.954539	0.903-1.008	-0.0465272	0.0279729
HLA-C	248_V	4.28679e-06	1.22434	1.123-1.334	0.202403	0.0440296	0.0921708	1.04758	0.992-1.105	0.046478	0.0275989
HLA-C	253_E	0.0191794	0.964548	0.935-0.994	-0.0360955	0.0154121	0.505569	0.993091	0.973-1.013	-0.00693341	0.0104144
HLA-C	253_Q	0.018853	1.03684	1.006-1.068	0.0361736	0.0154034	0.495478	1.00712	0.986-1.027	0.00709493	0.0104089
HLA-C	261_M	0.0159719	1.0379	1.006-1.069	0.0371966	0.0154371	0.450734	1.0079	0.987-1.028	0.00786851	0.010433
HLA-C	261_V	0.0161176	0.96347	0.934-0.993	-0.0372139	0.0154656	0.459745	0.992303	0.972-1.012	-0.00772678	0.0104519
HLA-C	267_P	0.0191794	0.964548	0.935-0.994	-0.0360955	0.0154121	0.505569	0.993091	0.973-1.013	-0.00693341	0.0104144
HLA-C	267_Q	0.018853	1.03684	1.006-1.068	0.0361736	0.0154034	0.495478	1.00712	0.986-1.027	0.00709493	0.0104089
HLA-C	273_R	0.0161176	0.96347	0.934-0.993	-0.0372139	0.0154656	0.459745	0.992303	0.972-1.012	-0.00772678	0.0104519
HLA-C	273_S	0.0159719	1.0379	1.006-1.069	0.0371966	0.0154371	0.450734	1.0079	0.987-1.028	0.00786851	0.010433
HLA-C	275_E	0.401407	1.01475	0.980-1.050	0.0146412	0.0174485	0.00221939	1.03678	1.013-1.061	0.0361159	0.0118057
HLA-C	275_G	1.10054e-05	1.09275	1.050-1.136	0.0887003	0.0201756	0.960499	1.00069	0.973-1.028	0.000692472	0.0139816
HLA-C	275_K	1.25866e-11	0.826347	0.781-0.873	-0.190741	0.0281606	3.62638e-06	0.91941	0.887-0.952	-0.0840227	0.0181407
HLA-C	285_M	0.0159719	1.0379	1.006-1.069	0.0371966	0.0154371	0.450734	1.0079	0.987-1.028	0.00786851	0.010433
HLA-C	285_V	0.0191794	0.964548	0.935-0.994	-0.0360955	0.0154121	0.505569	0.993091	0.973-1.013	-0.00693341	0.0104144
HLA-C	295_A	0.0155491	0.963279	0.934-0.992	-0.0374118	0.0154637	0.482967	0.992695	0.972-1.013	-0.00733202	0.0104514
HLA-C	295_V	0.0154085	1.0381	1.007-1.069	0.037394	0.0154353	0.473662	1.0075	0.987-1.028	0.00747524	0.0104325
HLA-C	303_M	6.15813e-12	0.819355	0.774-0.867	-0.199238	0.0289761	5.38826e-06	0.918847	0.885-0.952	-0.0846357	0.018605
HLA-C	303_V	6.33421e-12	1.21928	1.152-1.290	0.198257	0.0288503	4.98991e-06	1.08836	1.049-1.128	0.0846699	0.0185468
HLA-C	304_M	0.385345	1.01421	0.982-1.047	0.0141115	0.0162558	0.124014	0.983203	0.962-1.004	-0.01694	0.0110133
HLA-C	304_V	0.390256	0.986147	0.955-1.018	-0.0139499	0.0162368	0.12036	1.01723	0.995-1.039	0.0170849	0.0109993
HLA-C	305_A	0.0161176	0.96347	0.934-0.993	-0.0372139	0.0154656	0.459745	0.992303	0.972-1.012	-0.00772678	0.0104519
HLA-C	305_T	0.0159719	1.0379	1.006-1.069	0.0371966	0.0154371	0.450734	1.0079	0.987-1.028	0.00786851	0.010433
HLA-C	306_A	0.018853	1.03684	1.006-1.068	0.0361736	0.0154034	0.495478	1.00712	0.986-1.027	0.00709493	0.0104089
HLA-C	306_V	0.0191794	0.964548	0.935-0.994	-0.0360955	0.0154121	0.505569	0.993091	0.973-1.013	-0.00693341	0.0104144
HLA-C	307_M	0.0159719	1.0379	1.006-1.069	0.0371966	0.0154371	0.450734	1.0079	0.987-1.028	0.00786851	0.010433
HLA-C	307_V	0.0161176	0.96347	0.934-0.993	-0.0372139	0.0154656	0.459745	0.992303	0.972-1.012	-0.00772678	0.0104519
HLA-C	326_C	0.0159719	1.0379	1.006-1.069	0.0371966	0.0154371	0.450734	1.0079	0.987-1.028	0.00786851	0.010433
HLA-C	326_S	0.0161176	0.96347	0.934-0.993	-0.0372139	0.0154656	0.459745	0.992303	0.972-1.012	-0.00772678	0.0104519
HLA-C	339_A	0.0161176	0.96347	0.934-0.993	-0.0372139	0.0154656	0.459745	0.992303	0.972-1.012	-0.00772678	0.0104519
HLA-C	339_T	0.0159719	1.0379	1.006-1.069	0.0371966	0.0154371	0.450734	1.0079	0.987-1.028	0.00786851	0.010433
HLA-DQA1	-16_M_L	7.35716e-41	0.813426	0.789-0.838	-0.2065	0.0154272	6.81182e-48	0.860729	0.843-0.878	-0.149976	0.0103151
HLA-DQA1	11_Y_C	1.93695e-38	0.816628	0.791-0.842	-0.202572	0.0156247	3.23072e-48	0.8587	0.841-0.876	-0.152336	0.0104408
HLA-DQA1	18_S_F	1.93695e-38	0.816628	0.791-0.842	-0.202572	0.0156247	3.23072e-48	0.8587	0.841-0.876	-0.152336	0.0104408
HLA-DQA1	25_Y_F	0.000347114	0.93494	0.901-0.970	-0.0672734	0.0188055	0.00266544	0.963007	0.939-0.986	-0.0376944	0.0125485
HLA-DQA1	26_T_S	2.31942e-16	1.15663	1.117-1.197	0.145514	0.0177363	3.63214e-47	1.1874	1.160-1.215	0.171762	0.0119077
HLA-DQA1	34_Q_E	0.0296044	0.9682	0.940-0.996	-0.0323166	0.0148558	3.69128e-09	1.06078	1.040-1.081	0.0590046	0.0100051
HLA-DQA1	40_E_G	4.48433e-12	1.12265	1.086-1.160	0.115694	0.0167164	0.00471563	1.03298	1.009-1.056	0.0324516	0.0114838
HLA-DQA1	41_R_K	5.07675e-10	0.802018	0.748-0.859	-0.220624	0.0354889	1.45458e-08	0.877717	0.839-0.918	-0.130431	0.0230166
HLA-DQA1	45_V_A	1.93695e-38	0.816628	0.791-0.842	-0.202572	0.0156247	3.23072e-48	0.8587	0.841-0.876	-0.152336	0.0104408
HLA-DQA1	47_C	4.48433e-12	1.12265	1.086-1.160	0.115694	0.0167164	0.00471563	1.03298	1.009-1.056	0.0324516	0.0114838
HLA-DQA1	47_K	0.95215	0.998734	0.958-1.040	-0.00126669	0.0211092	0.954066	1.00082	0.973-1.029	0.000817216	0.0141875
HLA-DQA1	47_Q	2.31942e-16	1.15663	1.117-1.197	0.145514	0.0177363	3.63214e-47	1.1874	1.160-1.215	0.171762	0.0119077
HLA-DQA1	47_R	1.93695e-38	0.816628	0.791-0.842	-0.202572	0.0156247	3.23072e-48	0.8587	0.841-0.876	-0.152336	0.0104408
HLA-DQA1	48_L_W	1.93695e-38	0.816628	0.791-0.842	-0.202572	0.0156247	3.23072e-48	0.8587	0.841-0.876	-0.152336	0.0104408
HLA-DQA1	50_E	1.93695e-38	0.816628	0.791-0.842	-0.202572	0.0156247	3.23072e-48	0.8587	0.841-0.876	-0.152336	0.0104408
HLA-DQA1	50_L	5.26624e-12	1.11191	1.078-1.145	0.106082	0.0153782	1.50344e-34	1.13529	1.112-1.158	0.12689	0.0103508
HLA-DQA1	50_V	4.48433e-12	1.12265	1.086-1.160	0.115694	0.0167164	0.00471563	1.03298	1.009-1.056	0.0324516	0.0114838
HLA-DQA1	51_F_L	4.48433e-12	1.12265	1.086-1.160	0.115694	0.0167164	0.00471563	1.03298	1.009-1.056	0.0324516	0.0114838
HLA-DQA1	52_H	0.95215	0.998734	0.958-1.040	-0.00126669	0.0211092	0.954066	1.00082	0.973-1.029	0.000817216	0.0141875
HLA-DQA1	52_R	3.89899e-37	1.20996	1.174-1.245	0.190589	0.0149686	6.40458e-46	1.15424	1.131-1.177	0.143441	0.0100837
HLA-DQA1	52_S	1.93695e-38	0.816628	0.791-0.842	-0.202572	0.0156247	3.23072e-48	0.8587	0.841-0.876	-0.152336	0.0104408
HLA-DQA1	53_K	1.93695e-38	0.816628	0.791-0.842	-0.202572	0.0156247	3.23072e-48	0.8587	0.841-0.876	-0.152336	0.0104408
HLA-DQA1	53_Q	4.48433e-12	1.12265	1.086-1.160	0.115694	0.0167164	0.00471563	1.03298	1.009-1.056	0.0324516	0.0114838
HLA-DQA1	53_R	5.26624e-12	1.11191	1.078-1.145	0.106082	0.0153782	1.50344e-34	1.13529	1.112-1.158	0.12689	0.0103508
HLA-DQA1	54_F_L	0.95215	0.998734	0.958-1.040	-0.00126669	0.0211092	0.954066	1.00082	0.973-1.029	0.000817216	0.0141875
HLA-DQA1	55_R_G	1.93695e-38	0.816628	0.791-0.842	-0.202572	0.0156247	3.23072e-48	0.8587	0.841-0.876	-0.152336	0.0104408
HLA-DQA1	56_G	1.93695e-38	0.816628	0.791-0.842	-0.202572	0.0156247	3.23072e-48	0.8587	0.841-0.876	-0.152336	0.0104408
HLA-DQA1	56_R	2.31942e-16	1.15663	1.117-1.197	0.145514	0.0177363	3.63214e-47	1.1874	1.160-1.215	0.171762	0.0119077
HLA-DQA1	56_x	9.76753e-10	1.09689	1.064-1.129	0.0924816	0.0151283	0.0107272	1.02649	1.006-1.047	0.0261421	0.010246
HLA-DQA1	61_F_G	1.93695e-38	0.816628	0.791-0.842	-0.202572	0.0156247	3.23072e-48	0.8587	0.841-0.876	-0.152336	0.0104408
HLA-DQA1	64_T_R	1.93695e-38	0.816628	0.791-0.842	-0.202572	0.0156247	3.23072e-48	0.8587	0.841-0.876	-0.152336	0.0104408
HLA-DQA1	66_I_M	1.93695e-38	0.816628	0.791-0.842	-0.202572	0.0156247	3.23072e-48	0.8587	0.841-0.876	-0.152336	0.0104408
HLA-DQA1	69_A	1.93695e-38	0.816628	0.791-0.842	-0.202572	0.0156247	3.23072e-48	0.8587	0.841-0.876	-0.152336	0.0104408
HLA-DQA1	69_L	8.62512e-41	1.23031	1.193-1.268	0.207268	0.0154983	1.00174e-47	1.16233	1.138-1.186	0.150424	0.0103647
HLA-DQA1	69_T	0.0737048	0.910917	0.822-1.008	-0.0933035	0.0521703	0.792158	0.991088	0.927-1.059	-0.00895185	0.0339717
HLA-DQA1	75_I_S	7.37287e-15	1.14271	1.104-1.181	0.133407	0.017152	0.00260375	1.0363	1.012-1.060	0.03566	0.0118432
HLA-DQA1	76_L	9.76753e-10	1.09689	1.064-1.129	0.0924816	0.0151283	0.0107272	1.02649	1.006-1.047	0.0261421	0.010246
HLA-DQA1	76_M	1.93695e-38	0.816628	0.791-0.842	-0.202572	0.0156247	3.23072e-48	0.8587	0.841-0.876	-0.152336	0.0104408
HLA-DQA1	76_V	2.31942e-16	1.15663	1.117-1.197	0.145514	0.0177363	3.63214e-47	1.1874	1.160-1.215	0.171762	0.0119077
HLA-DQA1	80_S_Y	1.93695e-38	0.816628	0.791-0.842	-0.202572	0.0156247	3.23072e-48	0.8587	0.841-0.876	-0.152336	0.0104408
HLA-DQA1	107_T_I	7.37287e-15	1.14271	1.104-1.181	0.133407	0.017152	0.00260375	1.0363	1.012-1.060	0.03566	0.0118432
HLA-DQA1	129_H_Q	3.7167e-25	0.845616	0.819-0.872	-0.16769	0.0161842	7.92353e-35	0.87537	0.857-0.894	-0.133109	0.0108124
HLA-DQA1	130_S_A	5.07675e-10	0.802018	0.748-0.859	-0.220624	0.0354889	1.45458e-08	0.877717	0.839-0.918	-0.130431	0.0230166
HLA-DQA1	156_F_L	7.37287e-15	1.14271	1.104-1.181	0.133407	0.017152	0.00260375	1.0363	1.012-1.060	0.03566	0.0118432
HLA-DQA1	161_D_E	7.37287e-15	1.14271	1.104-1.181	0.133407	0.017152	0.00260375	1.0363	1.012-1.060	0.03566	0.0118432
HLA-DQA1	163_I_S	7.37287e-15	1.14271	1.104-1.181	0.133407	0.017152	0.00260375	1.0363	1.012-1.060	0.03566	0.0118432
HLA-DQA1	175_E	3.92885e-10	1.09993	1.067-1.133	0.0952485	0.0152231	2.8593e-33	1.131	1.108-1.153	0.123105	0.0102434
HLA-DQA1	175_K	7.37287e-15	1.14271	1.104-1.181	0.133407	0.017152	0.00260375	1.0363	1.012-1.060	0.03566	0.0118432
HLA-DQA1	175_Q	1.93695e-38	0.816628	0.791-0.842	-0.202572	0.0156247	3.23072e-48	0.8587	0.841-0.876	-0.152336	0.0104408
HLA-DQA1	187_A_T	2.31942e-16	1.15663	1.117-1.197	0.145514	0.0177363	3.63214e-47	1.1874	1.160-1.215	0.171762	0.0119077
HLA-DQA1	207_V_M	0.18425	0.975145	0.939-1.012	-0.025169	0.0189557	1.2309e-13	0.908006	0.885-0.931	-0.0965044	0.0130175
HLA-DQA1	215_F_L	5.26624e-12	1.11191	1.078-1.145	0.106082	0.0153782	1.50344e-34	1.13529	1.112-1.158	0.12689	0.0103508
HLA-DQA1	218_R_Q	1.93695e-38	0.816628	0.791-0.842	-0.202572	0.0156247	3.23072e-48	0.8587	0.841-0.876	-0.152336	0.0104408
HLA-DQB1	-32_M_x	3.10026e-07	0.781732	0.711-0.859	-0.246243	0.0481201	0.000221567	0.893761	0.842-0.948	-0.112317	0.030413
HLA-DQB1	-31_S_x	3.10026e-07	0.781732	0.711-0.859	-0.246243	0.0481201	0.000221567	0.893761	0.842-0.948	-0.112317	0.030413
HLA-DQB1	-30_W_x	3.10026e-07	0.781732	0.711-0.859	-0.246243	0.0481201	0.000221567	0.893761	0.842-0.948	-0.112317	0.030413
HLA-DQB1	-29_K_x	3.10026e-07	0.781732	0.711-0.859	-0.246243	0.0481201	0.000221567	0.893761	0.842-0.948	-0.112317	0.030413
HLA-DQB1	-28_K_x	3.10026e-07	0.781732	0.711-0.859	-0.246243	0.0481201	0.000221567	0.893761	0.842-0.948	-0.112317	0.030413
HLA-DQB1	-27_A	2.43579e-42	1.33537	1.280-1.392	0.289208	0.0212086	2.36395e-19	1.12928	1.099-1.159	0.121579	0.0135164
HLA-DQB1	-27_S	1.74737e-36	0.748692	0.715-0.783	-0.289428	0.0229433	1.4072e-15	0.890834	0.865-0.916	-0.115597	0.0144771
HLA-DQB1	-27_x	3.10026e-07	0.781732	0.711-0.859	-0.246243	0.0481201	0.000221567	0.893761	0.842-0.948	-0.112317	0.030413
HLA-DQB1	-26_L_x	3.10026e-07	0.781732	0.711-0.859	-0.246243	0.0481201	0.000221567	0.893761	0.842-0.948	-0.112317	0.030413
HLA-DQB1	-25_R_x	3.10026e-07	0.781732	0.711-0.859	-0.246243	0.0481201	0.000221567	0.893761	0.842-0.948	-0.112317	0.030413
HLA-DQB1	-24_I_x	3.10026e-07	0.781732	0.711-0.859	-0.246243	0.0481201	0.000221567	0.893761	0.842-0.948	-0.112317	0.030413
HLA-DQB1	-23_P_x	3.10026e-07	0.781732	0.711-0.859	-0.246243	0.0481201	0.000221567	0.893761	0.842-0.948	-0.112317	0.030413
HLA-DQB1	-22_G_x	3.10026e-07	0.781732	0.711-0.859	-0.246243	0.0481201	0.000221567	0.893761	0.842-0.948	-0.112317	0.030413
HLA-DQB1	-21_D	1.41159e-27	0.840289	0.814-0.867	-0.174009	0.0159912	3.65685e-40	0.867613	0.849-0.886	-0.142009	0.0107049
HLA-DQB1	-21_G	1.14077e-34	1.21488	1.177-1.253	0.194642	0.0158486	4.84842e-47	1.16511	1.141-1.189	0.152819	0.0106091
HLA-DQB1	-21_x	3.10026e-07	0.781732	0.711-0.859	-0.246243	0.0481201	0.000221567	0.893761	0.842-0.948	-0.112317	0.030413
HLA-DQB1	-20_L_x	3.10026e-07	0.781732	0.711-0.859	-0.246243	0.0481201	0.000221567	0.893761	0.842-0.948	-0.112317	0.030413
HLA-DQB1	-19_R_x	3.10026e-07	0.781732	0.711-0.859	-0.246243	0.0481201	0.000221567	0.893761	0.842-0.948	-0.112317	0.030413
HLA-DQB1	-18_A	1.5545e-33	1.20184	1.166-1.238	0.183858	0.0152349	2.18604e-18	1.09431	1.072-1.116	0.0901202	0.0103027
HLA-DQB1	-18_V	5.73058e-25	0.857562	0.832-0.882	-0.153662	0.0148899	2.30027e-13	0.929066	0.910-0.947	-0.0735758	0.0100375
HLA-DQB1	-18_x	3.10026e-07	0.781732	0.711-0.859	-0.246243	0.0481201	0.000221567	0.893761	0.842-0.948	-0.112317	0.030413
HLA-DQB1	-17_A	3.12293e-06	1.21828	1.121-1.323	0.197441	0.0423459	0.00227162	1.08643	1.030-1.145	0.0828958	0.0271593
HLA-DQB1	-17_x	3.10026e-07	0.781732	0.711-0.859	-0.246243	0.0481201	0.000221567	0.893761	0.842-0.948	-0.112317	0.030413
HLA-DQB1	-16_T_x	3.10026e-07	0.781732	0.711-0.859	-0.246243	0.0481201	0.000221567	0.893761	0.842-0.948	-0.112317	0.030413
HLA-DQB1	-15_V_x	3.10026e-07	0.781732	0.711-0.859	-0.246243	0.0481201	0.000221567	0.893761	0.842-0.948	-0.112317	0.030413
HLA-DQB1	-14_T_x	3.10026e-07	0.781732	0.711-0.859	-0.246243	0.0481201	0.000221567	0.893761	0.842-0.948	-0.112317	0.030413
HLA-DQB1	-13_L_x	3.10026e-07	0.781732	0.711-0.859	-0.246243	0.0481201	0.000221567	0.893761	0.842-0.948	-0.112317	0.030413
HLA-DQB1	-12_M_x	3.10026e-07	0.781732	0.711-0.859	-0.246243	0.0481201	0.000221567	0.893761	0.842-0.948	-0.112317	0.030413
HLA-DQB1	-11_L_x	3.10026e-07	0.781732	0.711-0.859	-0.246243	0.0481201	0.000221567	0.893761	0.842-0.948	-0.112317	0.030413
HLA-DQB1	-10_A	7.81809e-06	0.930032	0.900-0.960	-0.0725361	0.0162269	0.0026268	0.967444	0.946-0.988	-0.0330976	0.011002
HLA-DQB1	-10_S	7.19574e-11	1.11991	1.082-1.158	0.113247	0.0173784	3.36206e-06	1.0566	1.032-1.081	0.0550594	0.0118474
HLA-DQB1	-10_x	3.10026e-07	0.781732	0.711-0.859	-0.246243	0.0481201	0.000221567	0.893761	0.842-0.948	-0.112317	0.030413
HLA-DQB1	-9_I	1.74737e-36	0.748692	0.715-0.783	-0.289428	0.0229433	1.4072e-15	0.890834	0.865-0.916	-0.115597	0.0144771
HLA-DQB1	-9_M	2.43579e-42	1.33537	1.280-1.392	0.289208	0.0212086	2.36395e-19	1.12928	1.099-1.159	0.121579	0.0135164
HLA-DQB1	-9_x	3.10026e-07	0.781732	0.711-0.859	-0.246243	0.0481201	0.000221567	0.893761	0.842-0.948	-0.112317	0.030413
HLA-DQB1	-8_L_x	3.10026e-07	0.781732	0.711-0.859	-0.246243	0.0481201	0.000221567	0.893761	0.842-0.948	-0.112317	0.030413
HLA-DQB1	-7_S_x	3.10026e-07	0.781732	0.711-0.859	-0.246243	0.0481201	0.000221567	0.893761	0.842-0.948	-0.112317	0.030413
HLA-DQB1	-6_S	1.41159e-27	0.840289	0.814-0.867	-0.174009	0.0159912	3.65685e-40	0.867613	0.849-0.886	-0.142009	0.0107049
HLA-DQB1	-6_T	1.06805e-34	1.21497	1.177-1.253	0.194719	0.015848	3.64676e-47	1.16535	1.141-1.189	0.153026	0.010609
HLA-DQB1	-6_x	3.10026e-07	0.781732	0.711-0.859	-0.246243	0.0481201	0.000221567	0.893761	0.842-0.948	-0.112317	0.030413
HLA-DQB1	-5_L	0.0979285	0.969639	0.934-1.005	-0.0308313	0.0186294	6.33114e-18	0.895287	0.873-0.918	-0.110611	0.0128223
HLA-DQB1	-5_P	1.14077e-34	1.21488	1.177-1.253	0.194642	0.0158486	4.84842e-47	1.16511	1.141-1.189	0.152819	0.0106091
HLA-DQB1	-5_S	1.74737e-36	0.748692	0.715-0.783	-0.289428	0.0229433	1.4072e-15	0.890834	0.865-0.916	-0.115597	0.0144771
HLA-DQB1	-5_x	3.10026e-07	0.781732	0.711-0.859	-0.246243	0.0481201	0.000221567	0.893761	0.842-0.948	-0.112317	0.030413
HLA-DQB1	-4_L	1.41159e-27	0.840289	0.814-0.867	-0.174009	0.0159912	3.65685e-40	0.867613	0.849-0.886	-0.142009	0.0107049
HLA-DQB1	-4_V	1.14077e-34	1.21488	1.177-1.253	0.194642	0.0158486	4.84842e-47	1.16511	1.141-1.189	0.152819	0.0106091
HLA-DQB1	-4_x	3.10026e-07	0.781732	0.711-0.859	-0.246243	0.0481201	0.000221567	0.893761	0.842-0.948	-0.112317	0.030413
HLA-DQB1	-3_A_x	3.10026e-07	0.781732	0.711-0.859	-0.246243	0.0481201	0.000221567	0.893761	0.842-0.948	-0.112317	0.030413
HLA-DQB1	-2_E_x	3.10026e-07	0.781732	0.711-0.859	-0.246243	0.0481201	0.000221567	0.893761	0.842-0.948	-0.112317	0.030413
HLA-DQB1	-1_G_x	3.10026e-07	0.781732	0.711-0.859	-0.246243	0.0481201	0.000221567	0.893761	0.842-0.948	-0.112317	0.030413
HLA-DQB1	3_S	0.695894	1.03194	0.881-1.208	0.0314387	0.0804327	0.722579	0.981323	0.884-1.088	-0.018854	0.0531078
HLA-DQB1	9_F	0.174776	1.02747	0.988-1.068	0.0271031	0.0199726	3.4353e-09	0.921097	0.896-0.946	-0.0821898	0.0139085
HLA-DQB1	9_Y	0.182318	0.973998	0.937-1.012	-0.026346	0.0197548	1.26987e-08	1.08116	1.052-1.110	0.0780387	0.0137149
HLA-DQB1	13_G_A	4.97791e-16	1.16147	1.120-1.204	0.149686	0.0184523	1.00273e-09	1.08082	1.054-1.108	0.0777243	0.012723
HLA-DQB1	14_M_L	9.50052e-37	0.748777	0.715-0.783	-0.289314	0.0228475	1.04189e-15	0.890755	0.865-0.916	-0.115686	0.0144214
HLA-DQB1	26_G	1.61535e-37	0.75946	0.728-0.792	-0.275148	0.021494	4.51037e-16	0.894909	0.871-0.919	-0.111033	0.0136673
HLA-DQB1	26_L	0.00105481	1.05342	1.021-1.086	0.0520453	0.0158893	0.157315	1.01517	0.994-1.036	0.0150545	0.0106456
HLA-DQB1	26_Y	4.97791e-16	1.16147	1.120-1.204	0.149686	0.0184523	1.00273e-09	1.08082	1.054-1.108	0.0777243	0.012723
HLA-DQB1	28_T_S	7.19574e-11	1.11991	1.082-1.158	0.113247	0.0173784	3.36206e-06	1.0566	1.032-1.081	0.0550594	0.0118474
HLA-DQB1	30_H	6.03502e-56	0.739216	0.711-0.767	-0.302164	0.0191751	1.91922e-31	0.866204	0.845-0.887	-0.143635	0.0123131
HLA-DQB1	30_S	7.19574e-11	1.11991	1.082-1.158	0.113247	0.0173784	3.36206e-06	1.0566	1.032-1.081	0.0550594	0.0118474
HLA-DQB1	30_Y	5.40572e-14	1.11868	1.086-1.151	0.112151	0.0149103	5.22331e-09	1.06029	1.039-1.081	0.0585401	0.0100242
HLA-DQB1	37_I	7.19574e-11	1.11991	1.082-1.158	0.113247	0.0173784	3.36206e-06	1.0566	1.032-1.081	0.0550594	0.0118474
HLA-DQB1	37_Y	5.74378e-10	0.90231	0.873-0.932	-0.102797	0.0165874	5.27988e-06	0.949894	0.929-0.971	-0.0514049	0.0112895
HLA-DQB1	38_A_V	2.34754e-05	0.936265	0.908-0.965	-0.0658566	0.0155727	0.0492962	0.979688	0.959-0.999	-0.0205209	0.0104378
HLA-DQB1	45_G_E	4.42455e-18	1.17441	1.132-1.217	0.160768	0.0185488	7.12638e-10	1.08231	1.055-1.109	0.0790977	0.0128337
HLA-DQB1	46_V_E	7.19574e-11	1.11991	1.082-1.158	0.113247	0.0173784	3.36206e-06	1.0566	1.032-1.081	0.0550594	0.0118474
HLA-DQB1	47_Y_F	7.19574e-11	1.11991	1.082-1.158	0.113247	0.0173784	3.36206e-06	1.0566	1.032-1.081	0.0550594	0.0118474
HLA-DQB1	52_P_L	7.19574e-11	1.11991	1.082-1.158	0.113247	0.0173784	3.36206e-06	1.0566	1.032-1.081	0.0550594	0.0118474
HLA-DQB1	53_Q_L	9.84186e-37	1.22191	1.184-1.260	0.200413	0.0158304	9.91029e-48	1.16616	1.142-1.190	0.153718	0.0105912
HLA-DQB1	55_L	7.19574e-11	1.11991	1.082-1.158	0.113247	0.0173784	3.36206e-06	1.0566	1.032-1.081	0.0550594	0.0118474
HLA-DQB1	55_P	9.16956e-15	1.12739	1.093-1.162	0.119906	0.0154712	1.82987e-28	1.12264	1.099-1.145	0.11568	0.0104535
HLA-DQB1	55_R	8.64463e-41	0.812732	0.788-0.837	-0.207354	0.0155049	4.50398e-49	0.858422	0.841-0.876	-0.152659	0.0103679
HLA-DQB1	56_P_L	0.0402083	0.893161	0.801-0.994	-0.112989	0.0550734	0.182011	0.952839	0.887-1.022	-0.0483092	0.0361978
HLA-DQB1	57_A	3.6691e-16	1.13672	1.102-1.172	0.12815	0.0157259	1.89196e-28	1.1245	1.101-1.148	0.117342	0.0106065
HLA-DQB1	57_D	0.210914	1.01885	0.989-1.049	0.0186733	0.014926	8.22794e-05	0.961143	0.942-0.980	-0.0396325	0.010065
HLA-DQB1	57_V	2.25807e-33	0.766065	0.733-0.800	-0.266489	0.0221383	3.8571e-18	0.884591	0.860-0.909	-0.12263	0.0141231
HLA-DQB1	66_E_D	3.27099e-07	1.09008	1.054-1.126	0.0862504	0.0168882	6.35241e-05	1.04693	1.023-1.070	0.0458594	0.0114668
HLA-DQB1	67_V_I	3.27099e-07	1.09008	1.054-1.126	0.0862504	0.0168882	6.35241e-05	1.04693	1.023-1.070	0.0458594	0.0114668
HLA-DQB1	70_E	0.0266302	0.888181	0.799-0.986	-0.118579	0.0534889	0.146568	0.950355	0.887-1.017	-0.0509194	0.0350742
HLA-DQB1	70_G	4.06595e-26	0.843406	0.817-0.870	-0.170307	0.0161109	1.91662e-39	0.867838	0.849-0.886	-0.141751	0.0107869
HLA-DQB1	70_R	2.18598e-27	1.18932	1.152-1.227	0.173385	0.0159925	3.63953e-41	1.15498	1.130-1.179	0.144083	0.0107224
HLA-DQB1	71_A	1.74737e-36	0.748692	0.715-0.783	-0.289428	0.0229433	1.4072e-15	0.890834	0.865-0.916	-0.115597	0.0144771
HLA-DQB1	71_D	0.0266302	0.888181	0.799-0.986	-0.118579	0.0534889	0.146568	0.950355	0.887-1.017	-0.0509194	0.0350742
HLA-DQB1	71_K	7.19574e-11	1.11991	1.082-1.158	0.113247	0.0173784	3.36206e-06	1.0566	1.032-1.081	0.0550594	0.0118474
HLA-DQB1	71_T	7.6849e-05	1.06152	1.030-1.093	0.0596971	0.0150978	0.0291953	1.02235	1.002-1.042	0.0221076	0.0101372
HLA-DQB1	74_A	7.19574e-11	1.11991	1.082-1.158	0.113247	0.0173784	3.36206e-06	1.0566	1.032-1.081	0.0550594	0.0118474
HLA-DQB1	74_E	7.6849e-05	1.06152	1.030-1.093	0.0596971	0.0150978	0.0291953	1.02235	1.002-1.042	0.0221076	0.0101372
HLA-DQB1	74_S	1.61535e-37	0.75946	0.728-0.792	-0.275148	0.021494	4.51037e-16	0.894909	0.871-0.919	-0.111033	0.0136673
HLA-DQB1	75_L_V	9.97437e-06	0.934034	0.906-0.962	-0.0682427	0.0154475	0.0190896	0.976001	0.956-0.996	-0.024292	0.0103645
HLA-DQB1	77_T_R	0.000117857	0.941716	0.913-0.970	-0.0600512	0.0155955	0.0486487	0.979595	0.959-0.999	-0.0206163	0.0104563
HLA-DQB1	84_E	1.11004e-37	0.817571	0.792-0.843	-0.201418	0.0156987	3.66413e-47	0.859584	0.842-0.877	-0.151307	0.0104901
HLA-DQB1	84_Q	9.84186e-37	1.22191	1.184-1.260	0.200413	0.0158304	9.91029e-48	1.16616	1.142-1.190	0.153718	0.0105912
HLA-DQB1	85_L	9.84186e-37	1.22191	1.184-1.260	0.200413	0.0158304	9.91029e-48	1.16616	1.142-1.190	0.153718	0.0105912
HLA-DQB1	85_V	1.11004e-37	0.817571	0.792-0.843	-0.201418	0.0156987	3.66413e-47	0.859584	0.842-0.877	-0.151307	0.0104901
HLA-DQB1	86_A	8.50278e-28	0.838967	0.812-0.865	-0.175583	0.0160678	3.35136e-39	0.868688	0.850-0.887	-0.140771	0.010747
HLA-DQB1	86_E	9.84186e-37	1.22191	1.184-1.260	0.200413	0.0158304	9.91029e-48	1.16616	1.142-1.190	0.153718	0.0105912
HLA-DQB1	86_G	7.1238e-08	0.7941	0.730-0.863	-0.230546	0.0427887	5.27417e-05	0.895655	0.849-0.944	-0.1102	0.0272562
HLA-DQB1	87_F	0.0925702	0.968822	0.933-1.005	-0.0316743	0.0188314	2.64616e-17	0.896154	0.873-0.919	-0.109643	0.0129583
HLA-DQB1	87_L	9.84186e-37	1.22191	1.184-1.260	0.200413	0.0158304	9.91029e-48	1.16616	1.142-1.190	0.153718	0.0105912
HLA-DQB1	87_Y	1.63748e-45	0.744939	0.715-0.775	-0.294452	0.0207958	1.7389e-20	0.884659	0.862-0.907	-0.122553	0.01321
HLA-DQB1	89_G	1.11004e-37	0.817571	0.792-0.843	-0.201418	0.0156987	3.66413e-47	0.859584	0.842-0.877	-0.151307	0.0104901
HLA-DQB1	89_T	9.84186e-37	1.22191	1.184-1.260	0.200413	0.0158304	9.91029e-48	1.16616	1.142-1.190	0.153718	0.0105912
HLA-DQB1	90_I	1.11004e-37	0.817571	0.792-0.843	-0.201418	0.0156987	3.66413e-47	0.859584	0.842-0.877	-0.151307	0.0104901
HLA-DQB1	90_T	9.84186e-37	1.22191	1.184-1.260	0.200413	0.0158304	9.91029e-48	1.16616	1.142-1.190	0.153718	0.0105912
HLA-DQB1	116_I	1.74737e-36	0.748692	0.715-0.783	-0.289428	0.0229433	1.4072e-15	0.890834	0.865-0.916	-0.115597	0.0144771
HLA-DQB1	116_V	1.90475e-34	1.32175	1.264-1.382	0.278957	0.0227909	2.41956e-15	1.12149	1.090-1.153	0.114656	0.014481
HLA-DQB1	125_A	9.84186e-37	1.22191	1.184-1.260	0.200413	0.0158304	9.91029e-48	1.16616	1.142-1.190	0.153718	0.0105912
HLA-DQB1	125_G	5.71717e-05	0.930687	0.898-0.963	-0.0718322	0.0178501	1.43956e-22	0.888	0.867-0.909	-0.118783	0.0121516
HLA-DQB1	125_S	1.74737e-36	0.748692	0.715-0.783	-0.289428	0.0229433	1.4072e-15	0.890834	0.865-0.916	-0.115597	0.0144771
HLA-DQB1	126_Q	0.875369	0.989247	0.864-1.132	-0.0108115	0.0689323	0.998901	0.999935	0.912-1.096	-6.46343e-05	0.0469063
HLA-DQB1	130_Q	7.2186e-08	0.794104	0.730-0.863	-0.230541	0.0428066	5.32117e-05	0.895667	0.849-0.944	-0.110187	0.0272669
HLA-DQB1	130_R	1.06151e-05	1.1902	1.101-1.286	0.174119	0.0395344	0.000220749	1.09972	1.045-1.156	0.0950579	0.025733
HLA-DQB1	135_D	0.0161105	0.944945	0.902-0.989	-0.056629	0.0235326	0.0672165	0.971163	0.941-1.002	-0.029261	0.0159877
HLA-DQB1	135_G	0.0283831	1.06043	1.006-1.117	0.0586749	0.0267684	0.0494498	1.0363	1.000-1.073	0.0356559	0.0181484
HLA-DQB1	140_A	8.75456e-14	0.890434	0.863-0.918	-0.116046	0.015559	5.86329e-27	0.893191	0.874-0.911	-0.112955	0.0105065
HLA-DQB1	140_T	1.96762e-12	1.1138	1.080-1.147	0.10778	0.0153167	6.9139e-26	1.1149	1.092-1.137	0.108769	0.0103382
HLA-DQB1	167_H	4.97791e-16	1.16147	1.120-1.204	0.149686	0.0184523	1.00273e-09	1.08082	1.054-1.108	0.0777243	0.012723
HLA-DQB1	167_R	1.67508e-17	0.854263	0.823-0.885	-0.157517	0.0185001	5.47266e-10	0.923869	0.901-0.947	-0.0791853	0.0127617
HLA-DQB1	182_N	1.96762e-12	1.1138	1.080-1.147	0.10778	0.0153167	6.9139e-26	1.1149	1.092-1.137	0.108769	0.0103382
HLA-DQB1	182_S	8.75456e-14	0.890434	0.863-0.918	-0.116046	0.015559	5.86329e-27	0.893191	0.874-0.911	-0.112955	0.0105065
HLA-DQB1	185_I	0.891686	1.00265	0.965-1.041	0.00264771	0.019444	2.1714e-12	1.09408	1.066-1.121	0.0899148	0.0128029
HLA-DQB1	185_T	0.598688	0.989783	0.952-1.028	-0.0102694	0.0195128	8.91354e-13	0.912018	0.889-0.935	-0.0920951	0.0128871
HLA-DQB1	197_S	0.690075	1.0325	0.882-1.208	0.0319829	0.0802072	0.728877	0.98181	0.885-1.089	-0.0183576	0.0529618
HLA-DQB1	203_I	1.14077e-34	1.21488	1.177-1.253	0.194642	0.0158486	4.84842e-47	1.16511	1.141-1.189	0.152819	0.0106091
HLA-DQB1	203_V	1.02016e-35	0.821803	0.796-0.847	-0.196255	0.0157316	2.2956e-47	0.858925	0.841-0.876	-0.152074	0.0105197
HLA-DQB1	220_H	1.23991e-36	1.22138	1.184-1.259	0.199979	0.0158187	7.48279e-47	1.16429	1.140-1.188	0.152113	0.0105822
HLA-DQB1	220_R	1.13592e-37	0.817593	0.792-0.843	-0.20139	0.0156987	3.74776e-47	0.859598	0.842-0.877	-0.15129	0.01049
HLA-DQB1	221_H	1.23991e-36	1.22138	1.184-1.259	0.199979	0.0158187	7.48279e-47	1.16429	1.140-1.188	0.152113	0.0105822
HLA-DQB1	221_Q	1.13592e-37	0.817593	0.792-0.843	-0.20139	0.0156987	3.74776e-47	0.859598	0.842-0.877	-0.15129	0.01049
HLA-DQB1	224_Q	3.60299e-34	1.31873	1.261-1.378	0.276668	0.0227001	1.1932e-14	1.11771	1.086-1.149	0.11128	0.0144206
HLA-DQB1	224_R	1.74737e-36	0.748692	0.715-0.783	-0.289428	0.0229433	1.4072e-15	0.890834	0.865-0.916	-0.115597	0.0144771
HLA-DRB1	-29_M_x	0.103713	0.929291	0.850-1.015	-0.0733339	0.0450699	0.612861	0.98509	0.929-1.044	-0.0150223	0.0296887
HLA-DRB1	-28_V_x	0.103713	0.929291	0.850-1.015	-0.0733339	0.0450699	0.612861	0.98509	0.929-1.044	-0.0150223	0.0296887
HLA-DRB1	-27_C_x	0.103713	0.929291	0.850-1.015	-0.0733339	0.0450699	0.612861	0.98509	0.929-1.044	-0.0150223	0.0296887
HLA-DRB1	-26_L_x	0.103713	0.929291	0.850-1.015	-0.0733339	0.0450699	0.612861	0.98509	0.929-1.044	-0.0150223	0.0296887
HLA-DRB1	-25_K	0.701305	1.00598	0.975-1.037	0.00596081	0.0155408	0.0199601	1.02473	1.003-1.046	0.0244312	0.0104986
HLA-DRB1	-25_R	0.884006	0.997679	0.967-1.029	-0.00232396	0.0159292	0.00253828	0.967954	0.947-0.988	-0.0325702	0.0107893
HLA-DRB1	-25_x	0.103713	0.929291	0.850-1.015	-0.0733339	0.0450699	0.612861	0.98509	0.929-1.044	-0.0150223	0.0296887
HLA-DRB1	-24_F	7.10443e-18	1.17859	1.135-1.223	0.164319	0.0190776	2.97531e-43	1.19399	1.164-1.224	0.177305	0.0128586
HLA-DRB1	-24_L	9.45973e-14	0.878709	0.849-0.909	-0.129301	0.01736	4.48203e-39	0.858516	0.839-0.878	-0.15255	0.0116659
HLA-DRB1	-24_x	0.103713	0.929291	0.850-1.015	-0.0733339	0.0450699	0.612861	0.98509	0.929-1.044	-0.0150223	0.0296887
HLA-DRB1	-23_P_x	0.103713	0.929291	0.850-1.015	-0.0733339	0.0450699	0.612861	0.98509	0.929-1.044	-0.0150223	0.0296887
HLA-DRB1	-22_G_x	0.103713	0.929291	0.850-1.015	-0.0733339	0.0450699	0.612861	0.98509	0.929-1.044	-0.0150223	0.0296887
HLA-DRB1	-21_G_x	0.103713	0.929291	0.850-1.015	-0.0733339	0.0450699	0.612861	0.98509	0.929-1.044	-0.0150223	0.0296887
HLA-DRB1	-20_S_x	0.103713	0.929291	0.850-1.015	-0.0733339	0.0450699	0.612861	0.98509	0.929-1.044	-0.0150223	0.0296887
HLA-DRB1	-19_C_x	0.103713	0.929291	0.850-1.015	-0.0733339	0.0450699	0.612861	0.98509	0.929-1.044	-0.0150223	0.0296887
HLA-DRB1	-18_M_x	0.103713	0.929291	0.850-1.015	-0.0733339	0.0450699	0.612861	0.98509	0.929-1.044	-0.0150223	0.0296887
HLA-DRB1	-17_A	6.66497e-12	1.12093	1.084-1.158	0.114158	0.0166298	1.68044e-19	1.10603	1.082-1.130	0.100778	0.0111574
HLA-DRB1	-17_T	1.28481e-11	0.890464	0.861-0.920	-0.116012	0.0171354	3.87674e-23	0.892246	0.872-0.912	-0.114013	0.0115082
HLA-DRB1	-17_x	0.103713	0.929291	0.850-1.015	-0.0733339	0.0450699	0.612861	0.98509	0.929-1.044	-0.0150223	0.0296887
HLA-DRB1	-16_A	0.701305	1.00598	0.975-1.037	0.00596081	0.0155408	0.0199601	1.02473	1.003-1.046	0.0244312	0.0104986
HLA-DRB1	-16_V	0.884006	0.997679	0.967-1.029	-0.00232396	0.0159292	0.00253828	0.967954	0.947-0.988	-0.0325702	0.0107893
HLA-DRB1	-16_x	0.103713	0.929291	0.850-1.015	-0.0733339	0.0450699	0.612861	0.98509	0.929-1.044	-0.0150223	0.0296887
HLA-DRB1	-15_L_x	0.103713	0.929291	0.850-1.015	-0.0733339	0.0450699	0.612861	0.98509	0.929-1.044	-0.0150223	0.0296887
HLA-DRB1	-14_T_x	0.103713	0.929291	0.850-1.015	-0.0733339	0.0450699	0.612861	0.98509	0.929-1.044	-0.0150223	0.0296887
HLA-DRB1	-13_V_x	0.103713	0.929291	0.850-1.015	-0.0733339	0.0450699	0.612861	0.98509	0.929-1.044	-0.0150223	0.0296887
HLA-DRB1	-12_T_x	0.103713	0.929291	0.850-1.015	-0.0733339	0.0450699	0.612861	0.98509	0.929-1.044	-0.0150223	0.0296887
HLA-DRB1	-11_L_x	0.103713	0.929291	0.850-1.015	-0.0733339	0.0450699	0.612861	0.98509	0.929-1.044	-0.0150223	0.0296887
HLA-DRB1	-10_M_x	0.103713	0.929291	0.850-1.015	-0.0733339	0.0450699	0.612861	0.98509	0.929-1.044	-0.0150223	0.0296887
HLA-DRB1	-9_V_x	0.103713	0.929291	0.850-1.015	-0.0733339	0.0450699	0.612861	0.98509	0.929-1.044	-0.0150223	0.0296887
HLA-DRB1	-8_L_x	0.103713	0.929291	0.850-1.015	-0.0733339	0.0450699	0.612861	0.98509	0.929-1.044	-0.0150223	0.0296887
HLA-DRB1	-7_S_x	0.103713	0.929291	0.850-1.015	-0.0733339	0.0450699	0.612861	0.98509	0.929-1.044	-0.0150223	0.0296887
HLA-DRB1	-6_S_x	0.103713	0.929291	0.850-1.015	-0.0733339	0.0450699	0.612861	0.98509	0.929-1.044	-0.0150223	0.0296887
HLA-DRB1	-5_P_x	0.103713	0.929291	0.850-1.015	-0.0733339	0.0450699	0.612861	0.98509	0.929-1.044	-0.0150223	0.0296887
HLA-DRB1	-4_L_x	0.103713	0.929291	0.850-1.015	-0.0733339	0.0450699	0.612861	0.98509	0.929-1.044	-0.0150223	0.0296887
HLA-DRB1	-3_A_x	0.103713	0.929291	0.850-1.015	-0.0733339	0.0450699	0.612861	0.98509	0.929-1.044	-0.0150223	0.0296887
HLA-DRB1	-2_L_x	0.103713	0.929291	0.850-1.015	-0.0733339	0.0450699	0.612861	0.98509	0.929-1.044	-0.0150223	0.0296887
HLA-DRB1	-1_A	0.334178	0.981619	0.945-1.019	-0.0185517	0.01921	3.20595e-06	1.06348	1.036-1.091	0.0615493	0.0132161
HLA-DRB1	-1_S	0.172096	1.02858	0.987-1.071	0.0281832	0.0206395	4.98681e-09	0.919239	0.893-0.945	-0.0842089	0.0144006
HLA-DRB1	-1_x	0.103713	0.929291	0.850-1.015	-0.0733339	0.0450699	0.612861	0.98509	0.929-1.044	-0.0150223	0.0296887
HLA-DRB1	4_Q	0.972902	0.999311	0.960-1.039	-0.000689154	0.0202875	0.293385	1.01438	0.987-1.041	0.0142755	0.0135863
HLA-DRB1	4_R	0.694646	0.992108	0.953-1.032	-0.00792357	0.0201845	0.0362903	0.972109	0.946-0.998	-0.028287	0.0135108
HLA-DRB1	9_E	3.42688e-09	1.09534	1.062-1.128	0.0910658	0.0154095	5.33635e-14	1.08111	1.059-1.103	0.0779888	0.0103661
HLA-DRB1	9_K	0.865681	1.01105	0.890-1.148	0.0109884	0.0649638	0.000299601	1.16052	1.070-1.258	0.148865	0.0411724
HLA-DRB1	9_W	6.45583e-10	0.910339	0.883-0.937	-0.0939377	0.015203	2.10612e-19	0.911977	0.893-0.930	-0.0921405	0.0102292
HLA-DRB1	10_Q	0.701438	1.00598	0.975-1.037	0.00595804	0.0155408	0.0199833	1.02473	1.003-1.046	0.0244267	0.0104986
HLA-DRB1	10_Y	0.591607	0.991621	0.961-1.022	-0.00841386	0.0156826	0.00463152	0.970432	0.950-0.990	-0.0300137	0.0105995
HLA-DRB1	11_D	0.865681	1.01105	0.890-1.148	0.0109884	0.0649638	0.000299601	1.16052	1.070-1.258	0.148865	0.0411724
HLA-DRB1	11_G	0.928572	0.998117	0.957-1.040	-0.00188508	0.021029	0.936857	0.99888	0.971-1.026	-0.00112025	0.0141409
HLA-DRB1	11_L	1.23299e-25	0.766252	0.728-0.805	-0.266245	0.0254382	9.34254e-13	0.891467	0.863-0.920	-0.114887	0.0160909
HLA-DRB1	11_P	0.308474	1.02096	0.981-1.062	0.0207423	0.0203669	6.4885e-09	0.921085	0.895-0.947	-0.0822025	0.0141639
HLA-DRB1	11_S	0.591607	0.991621	0.961-1.022	-0.00841386	0.0156826	0.00463152	0.970432	0.950-0.990	-0.0300137	0.0105995
HLA-DRB1	11_V	1.49263e-16	1.16865	1.126-1.212	0.15585	0.0188747	8.20289e-40	1.18293	1.153-1.212	0.167994	0.0127219
HLA-DRB1	12_T_K	0.845707	1.00304	0.972-1.034	0.00303258	0.0155837	0.0436256	1.02147	1.000-1.042	0.0212407	0.0105273
HLA-DRB1	13_F	1.07148e-23	0.789876	0.754-0.827	-0.23588	0.0235061	2.86211e-09	0.915057	0.888-0.942	-0.0887686	0.0149459
HLA-DRB1	13_G	0.0758536	0.931195	0.860-1.007	-0.0712865	0.0401553	0.00475246	0.926075	0.877-0.976	-0.0768005	0.0272019
HLA-DRB1	13_H	7.1186e-18	1.17859	1.135-1.223	0.164315	0.0190776	2.99869e-43	1.19399	1.164-1.224	0.177298	0.0128586
HLA-DRB1	13_R	0.308474	1.02096	0.981-1.062	0.0207423	0.0203669	6.4885e-09	0.921085	0.895-0.947	-0.0822025	0.0141639
HLA-DRB1	13_S	0.855213	1.00294	0.971-1.035	0.00293561	0.0160881	0.0803803	0.981149	0.960-1.002	-0.0190314	0.0108845
HLA-DRB1	13_Y	0.928572	0.998117	0.957-1.040	-0.00188508	0.021029	0.936857	0.99888	0.971-1.026	-0.00112025	0.0141409
HLA-DRB1	14_E_K	0.928572	0.998117	0.957-1.040	-0.00188508	0.021029	0.936857	0.99888	0.971-1.026	-0.00112025	0.0141409
HLA-DRB1	16_H	0.389621	1.03098	0.961-1.105	0.0305093	0.0354633	0.464616	1.01762	0.971-1.066	0.0174672	0.0238862
HLA-DRB1	16_Y	0.0758536	0.931195	0.860-1.007	-0.0712865	0.0401553	0.00475246	0.926075	0.877-0.976	-0.0768005	0.0272019
HLA-DRB1	25_R_Q	0.928572	0.998117	0.957-1.040	-0.00188508	0.021029	0.936857	0.99888	0.971-1.026	-0.00112025	0.0141409
HLA-DRB1	26_F	0.0120821	1.04226	1.009-1.076	0.0413914	0.0164923	0.0915274	1.01883	0.996-1.041	0.0186554	0.0110557
HLA-DRB1	26_L	8.42921e-25	0.785864	0.750-0.822	-0.240972	0.0234346	2.80903e-17	0.880283	0.854-0.906	-0.127512	0.0150826
HLA-DRB1	26_Y	1.03407e-09	1.12572	1.083-1.169	0.118425	0.019401	1.49771e-06	1.06609	1.038-1.094	0.0640019	0.0133018
HLA-DRB1	28_D	6.2463e-14	1.13404	1.097-1.171	0.125785	0.0167651	1.9202e-06	1.0544	1.031-1.077	0.052968	0.0111239
HLA-DRB1	28_E	2.05302e-15	0.874089	0.845-0.903	-0.134573	0.0169528	6.17958e-11	0.929149	0.908-0.949	-0.0734857	0.0112375
HLA-DRB1	28_H	0.865681	1.01105	0.890-1.148	0.0109884	0.0649638	0.000299601	1.16052	1.070-1.258	0.148865	0.0411724
HLA-DRB1	30_C	1.23299e-25	0.766252	0.728-0.805	-0.266245	0.0254382	9.34254e-13	0.891467	0.863-0.920	-0.114887	0.0160909
HLA-DRB1	30_G	0.865681	1.01105	0.890-1.148	0.0109884	0.0649638	0.000299601	1.16052	1.070-1.258	0.148865	0.0411724
HLA-DRB1	30_H	0.425384	0.951111	0.840-1.075	-0.0501242	0.062882	0.000105392	0.840006	0.769-0.917	-0.174346	0.0449596
HLA-DRB1	30_L	0.928572	0.998117	0.957-1.040	-0.00188508	0.021029	0.936857	0.99888	0.971-1.026	-0.00112025	0.0141409
HLA-DRB1	30_Y	4.62881e-14	1.13481	1.098-1.172	0.126466	0.0167682	1.95513e-06	1.05435	1.031-1.077	0.0529278	0.0111239
HLA-DRB1	31_F	5.06228e-21	1.23896	1.184-1.295	0.21427	0.0227755	1.98808e-06	1.07176	1.041-1.102	0.0693016	0.0145756
HLA-DRB1	31_I	2.50486e-23	0.787606	0.751-0.825	-0.238757	0.0239941	2.10677e-08	0.918322	0.891-0.946	-0.0852076	0.0152075
HLA-DRB1	32_Y_H	0.0135177	0.959637	0.928-0.991	-0.0411999	0.0166813	8.5971e-05	0.956791	0.935-0.978	-0.0441703	0.0112475
HLA-DRB1	33_N_H	7.10443e-18	1.17859	1.135-1.223	0.164319	0.0190776	2.97531e-43	1.19399	1.164-1.224	0.177305	0.0128586
HLA-DRB1	37_F	0.0128574	0.950833	0.913-0.989	-0.0504169	0.0202665	0.279392	0.985522	0.959-1.011	-0.0145841	0.0134827
HLA-DRB1	37_L	0.496964	0.958122	0.846-1.084	-0.04278	0.0629789	0.000100279	0.838687	0.767-0.916	-0.175917	0.045224
HLA-DRB1	37_N	0.957627	0.999093	0.966-1.033	-0.000907632	0.0170827	0.408324	0.990508	0.968-1.013	-0.00953691	0.0115341
HLA-DRB1	37_S	1.40324e-11	0.890716	0.861-0.921	-0.115729	0.0171259	1.62767e-23	0.891385	0.871-0.911	-0.114979	0.0115054
HLA-DRB1	37_Y	1.4612e-19	1.16472	1.126-1.203	0.152479	0.016853	3.88429e-35	1.1515	1.126-1.177	0.141063	0.0114053
HLA-DRB1	38_L	0.496964	0.958122	0.846-1.084	-0.04278	0.0629789	0.000100279	0.838687	0.767-0.916	-0.175917	0.045224
HLA-DRB1	38_V	0.949583	1.0028	0.919-1.093	0.00279421	0.0441905	0.162024	1.04333	0.983-1.107	0.0424197	0.0303367
HLA-DRB1	47_Y_F	0.00591852	1.0422	1.011-1.073	0.0413353	0.0150187	8.91542e-10	0.939624	0.921-0.958	-0.0622754	0.0101629
HLA-DRB1	57_A	3.0641e-10	0.673383	0.595-0.761	-0.395441	0.0628133	0.00811628	0.906418	0.842-0.974	-0.0982544	0.0371164
HLA-DRB1	57_D	0.00820487	1.0484	1.012-1.085	0.0472624	0.0178786	0.99679	1.00005	0.976-1.023	4.79514e-05	0.0119193
HLA-DRB1	57_S	0.115492	0.936466	0.862-1.016	-0.0656416	0.0417041	0.707742	1.01027	0.957-1.065	0.010213	0.0272427
HLA-DRB1	57_V	0.809385	0.995282	0.957-1.034	-0.00472915	0.0196052	0.834643	0.99725	0.971-1.023	-0.0027536	0.0131909
HLA-DRB1	58_A_E	3.08669e-06	1.16536	1.092-1.242	0.153029	0.0328038	0.179404	1.03176	0.985-1.079	0.0312706	0.0232912
HLA-DRB1	60_H	3.15631e-10	0.673587	0.595-0.761	-0.395138	0.062811	0.0065526	0.903897	0.840-0.972	-0.10104	0.037164
HLA-DRB1	60_S	0.8041	0.995149	0.957-1.034	-0.00486325	0.0196064	0.835979	0.997273	0.971-1.023	-0.00273107	0.0131911
HLA-DRB1	60_Y	0.0378146	1.04008	1.002-1.079	0.0392934	0.0189196	0.840904	1.00254	0.978-1.027	0.00253397	0.0126233
HLA-DRB1	67_F	0.027399	1.0596	1.006-1.115	0.0578875	0.0262435	0.0314403	1.03922	1.003-1.076	0.0384718	0.0178817
HLA-DRB1	67_I	5.24317e-06	0.933511	0.906-0.961	-0.0688023	0.0151054	6.04116e-21	0.908779	0.890-0.927	-0.0956529	0.0101875
HLA-DRB1	67_L	0.00249039	1.04697	1.016-1.078	0.0459048	0.0151776	6.15431e-14	1.07967	1.058-1.101	0.0766592	0.0102148
HLA-DRB1	70_D	7.67309e-06	0.93181	0.903-0.961	-0.0706268	0.0157857	4.55209e-07	0.947917	0.928-0.967	-0.0534879	0.0106037
HLA-DRB1	70_Q	1.65302e-09	1.09725	1.064-1.130	0.0928055	0.015394	1.13753e-05	1.04637	1.025-1.067	0.0453305	0.0103277
HLA-DRB1	70_R	6.21405e-07	0.81154	0.747-0.880	-0.208822	0.0418948	0.54316	0.98432	0.935-1.035	-0.0158038	0.0259913
HLA-DRB1	71_A	0.172096	1.02858	0.987-1.071	0.0281832	0.0206395	4.98681e-09	0.919239	0.893-0.945	-0.0842089	0.0144006
HLA-DRB1	71_E	7.18383e-17	0.810424	0.771-0.851	-0.210198	0.0251916	3.51115e-12	0.892583	0.864-0.921	-0.113635	0.0163373
HLA-DRB1	71_K	2.59705e-32	1.21167	1.173-1.250	0.191997	0.0162239	2.65448e-32	1.1399	1.115-1.164	0.130945	0.0110666
HLA-DRB1	71_R	3.42981e-11	0.902911	0.876-0.930	-0.102131	0.0154118	0.00703302	0.972535	0.953-0.992	-0.0278491	0.0103326
HLA-DRB1	73_A_G	1.5016e-06	1.08013	1.046-1.114	0.0770819	0.0160219	0.00352936	1.03224	1.010-1.054	0.0317299	0.010876
HLA-DRB1	74_A	0.013368	0.96231	0.933-0.992	-0.0384186	0.0155301	6.53956e-05	0.959101	0.939-0.978	-0.0417593	0.0104596
HLA-DRB1	74_E	3.33118e-06	0.83337	0.771-0.899	-0.182277	0.0392056	0.278505	1.02669	0.978-1.076	0.026337	0.0243032
HLA-DRB1	74_L	0.115704	0.921579	0.832-1.020	-0.0816664	0.0519156	0.819577	0.992285	0.928-1.060	-0.00774484	0.0339553
HLA-DRB1	74_Q	0.928572	0.998117	0.957-1.040	-0.00188508	0.021029	0.936857	0.99888	0.971-1.026	-0.00112025	0.0141409
HLA-DRB1	74_R	4.13606e-10	1.13309	1.089-1.178	0.124952	0.0199962	0.000134709	1.05408	1.025-1.082	0.052673	0.0137971
HLA-DRB1	77_T_N	4.13606e-10	1.13309	1.089-1.178	0.124952	0.0199962	0.000134709	1.05408	1.025-1.082	0.052673	0.0137971
HLA-DRB1	78_Y_V	0.972902	0.999311	0.960-1.039	-0.000689154	0.0202875	0.293385	1.01438	0.987-1.041	0.0142755	0.0135863
HLA-DRB1	85_V_A	0.377671	0.955453	0.863-1.057	-0.0455694	0.0516545	1.26273e-06	0.835934	0.777-0.898	-0.179205	0.0369837
HLA-DRB1	86_G_V	0.0894205	1.02581	0.996-1.056	0.0254857	0.0150051	8.90042e-06	0.95595	0.937-0.975	-0.0450494	0.010141
HLA-DRB1	96_E	1.23299e-25	0.766252	0.728-0.805	-0.266245	0.0254382	9.34254e-13	0.891467	0.863-0.920	-0.114887	0.0160909
HLA-DRB1	96_H	0.595314	0.992059	0.963-1.021	-0.00797286	0.0150105	0.0517636	0.980539	0.961-1.000	-0.0196532	0.010104
HLA-DRB1	96_Q	0.448917	1.01534	0.976-1.056	0.0152252	0.0201067	8.87237e-10	0.917967	0.893-0.943	-0.0855936	0.0139665
HLA-DRB1	96_Y	7.10443e-18	1.17859	1.135-1.223	0.164319	0.0190776	2.97531e-43	1.19399	1.164-1.224	0.177305	0.0128586
HLA-DRB1	98_E	6.13483e-12	1.11443	1.080-1.149	0.10834	0.0157551	1.44181e-32	1.13435	1.111-1.158	0.126057	0.0106077
HLA-DRB1	98_K	1.44695e-12	0.896162	0.869-0.923	-0.109635	0.0154862	1.0449e-35	0.878083	0.860-0.896	-0.130014	0.0104234
HLA-DRB1	104_A	6.13483e-12	1.11443	1.080-1.149	0.10834	0.0157551	1.44181e-32	1.13435	1.111-1.158	0.126057	0.0106077
HLA-DRB1	104_S	1.47341e-12	0.896201	0.869-0.923	-0.10959	0.0154855	7.50469e-36	0.877852	0.860-0.895	-0.130278	0.0104226
HLA-DRB1	112_H	2.19921e-05	1.22386	1.114-1.343	0.202007	0.0476022	0.747288	0.990439	0.934-1.050	-0.00960661	0.0298141
HLA-DRB1	112_Y	4.53843e-10	0.670632	0.591-0.760	-0.399534	0.0640866	0.0122485	0.909949	0.845-0.979	-0.0943673	0.037673
HLA-DRB1	120_N	1.48982e-16	1.16866	1.126-1.212	0.155854	0.0188747	8.1425e-40	1.18294	1.153-1.212	0.168001	0.0127219
HLA-DRB1	120_S	1.99554e-16	0.862744	0.832-0.893	-0.147637	0.0179556	1.50857e-41	0.849454	0.829-0.869	-0.163161	0.0120837
HLA-DRB1	133_L	0.308474	1.02096	0.981-1.062	0.0207423	0.0203669	6.4885e-09	0.921085	0.895-0.947	-0.0822025	0.0141639
HLA-DRB1	133_R	0.147987	0.971245	0.933-1.010	-0.0291763	0.0201678	3.07308e-06	1.06725	1.038-1.096	0.0650897	0.0139502
HLA-DRB1	140_A	9.67443e-10	0.911682	0.885-0.939	-0.0924644	0.0151217	4.07973e-16	0.92059	0.902-0.939	-0.0827404	0.0101694
HLA-DRB1	140_T	3.3558e-09	1.09538	1.062-1.128	0.0911005	0.0154064	7.17691e-14	1.08066	1.058-1.102	0.0775715	0.0103642
HLA-DRB1	142_M	0.308474	1.02096	0.981-1.062	0.0207423	0.0203669	6.4885e-09	0.921085	0.895-0.947	-0.0822025	0.0141639
HLA-DRB1	142_V	0.147987	0.971245	0.933-1.010	-0.0291763	0.0201678	3.07308e-06	1.06725	1.038-1.096	0.0650897	0.0139502
HLA-DRB1	149_H	0.594734	0.991692	0.961-1.022	-0.00834259	0.0156819	0.00409729	0.97003	0.950-0.990	-0.0304284	0.0106001
HLA-DRB1	149_Q	0.845566	1.00304	0.972-1.034	0.00303538	0.0155837	0.0435798	1.02147	1.000-1.042	0.0212453	0.0105273
HLA-DRB1	166_R	0.567138	0.965615	0.856-1.088	-0.0349902	0.0611426	0.0386083	0.919191	0.848-0.995	-0.0842612	0.0407386
HLA-DRB1	180_L	7.10443e-18	1.17859	1.135-1.223	0.164319	0.0190776	2.97531e-43	1.19399	1.164-1.224	0.177305	0.0128586
HLA-DRB1	180_V	2.25433e-14	0.87396	0.844-0.904	-0.134721	0.0176447	4.30498e-41	0.852894	0.833-0.872	-0.15912	0.0118523
HLA-DRB1	180_x	0.055408	0.895038	0.799-1.002	-0.11089	0.0578858	0.743452	0.9878	0.917-1.063	-0.0122748	0.0375049
HLA-DRB1	181_M	0.781624	0.994465	0.956-1.034	-0.00555065	0.0200238	0.52793	1.0085	0.982-1.035	0.0084667	0.0134143
HLA-DRB1	181_T	0.606098	1.00996	0.972-1.048	0.00990809	0.0192147	0.14037	0.981234	0.956-1.006	-0.018944	0.0128485
HLA-DRB1	181_x	0.055408	0.895038	0.799-1.002	-0.11089	0.0578858	0.743452	0.9878	0.917-1.063	-0.0122748	0.0375049
HLA-DRB1	182_S_x	0.055408	0.895038	0.799-1.002	-0.11089	0.0578858	0.743452	0.9878	0.917-1.063	-0.0122748	0.0375049
HLA-DRB1	183_P_x	0.055408	0.895038	0.799-1.002	-0.11089	0.0578858	0.743452	0.9878	0.917-1.063	-0.0122748	0.0375049
HLA-DRB1	184_L_x	0.055408	0.895038	0.799-1.002	-0.11089	0.0578858	0.743452	0.9878	0.917-1.063	-0.0122748	0.0375049
HLA-DRB1	185_T_x	0.055408	0.895038	0.799-1.002	-0.11089	0.0578858	0.743452	0.9878	0.917-1.063	-0.0122748	0.0375049
HLA-DRB1	186_V_x	0.055408	0.895038	0.799-1.002	-0.11089	0.0578858	0.743452	0.9878	0.917-1.063	-0.0122748	0.0375049
HLA-DRB1	187_E_x	0.055408	0.895038	0.799-1.002	-0.11089	0.0578858	0.743452	0.9878	0.917-1.063	-0.0122748	0.0375049
HLA-DRB1	188_W_x	0.0813604	0.921743	0.841-1.010	-0.0814889	0.0467562	0.696943	0.988133	0.930-1.049	-0.0119379	0.0306531
HLA-DRB1	189_R	0.650872	1.01749	0.943-1.096	0.017338	0.0383117	0.0608144	0.953679	0.907-1.002	-0.0474286	0.0252974
HLA-DRB1	189_x	0.0811289	0.921702	0.841-1.010	-0.081533	0.0467459	0.687618	0.987751	0.930-1.048	-0.0123245	0.0306512
HLA-DRB1	190_A_x	0.0811289	0.921702	0.841-1.010	-0.081533	0.0467459	0.687618	0.987751	0.930-1.048	-0.0123245	0.0306512
HLA-DRB1	191_R_x	0.0811289	0.921702	0.841-1.010	-0.081533	0.0467459	0.687618	0.987751	0.930-1.048	-0.0123245	0.0306512
HLA-DRB1	192_S_x	0.0811289	0.921702	0.841-1.010	-0.081533	0.0467459	0.687618	0.987751	0.930-1.048	-0.0123245	0.0306512
HLA-DRB1	193_E_x	0.0811289	0.921702	0.841-1.010	-0.081533	0.0467459	0.687618	0.987751	0.930-1.048	-0.0123245	0.0306512
HLA-DRB1	194_S_x	0.0811289	0.921702	0.841-1.010	-0.081533	0.0467459	0.687618	0.987751	0.930-1.048	-0.0123245	0.0306512
HLA-DRB1	195_A_x	0.0811289	0.921702	0.841-1.010	-0.081533	0.0467459	0.687618	0.987751	0.930-1.048	-0.0123245	0.0306512
HLA-DRB1	196_Q_x	0.0811289	0.921702	0.841-1.010	-0.081533	0.0467459	0.687618	0.987751	0.930-1.048	-0.0123245	0.0306512
HLA-DRB1	197_S_x	0.0811289	0.921702	0.841-1.010	-0.081533	0.0467459	0.687618	0.987751	0.930-1.048	-0.0123245	0.0306512
HLA-DRB1	198_K_x	0.0811289	0.921702	0.841-1.010	-0.081533	0.0467459	0.687618	0.987751	0.930-1.048	-0.0123245	0.0306512
HLA-DRB1	199_M_x	0.0811289	0.921702	0.841-1.010	-0.081533	0.0467459	0.687618	0.987751	0.930-1.048	-0.0123245	0.0306512
HLA-DRB1	200_L_x	0.0811289	0.921702	0.841-1.010	-0.081533	0.0467459	0.687618	0.987751	0.930-1.048	-0.0123245	0.0306512
HLA-DRB1	201_S_x	0.0811289	0.921702	0.841-1.010	-0.081533	0.0467459	0.687618	0.987751	0.930-1.048	-0.0123245	0.0306512
HLA-DRB1	202_G_x	0.0811289	0.921702	0.841-1.010	-0.081533	0.0467459	0.687618	0.987751	0.930-1.048	-0.0123245	0.0306512
HLA-DRB1	203_V_x	0.0811289	0.921702	0.841-1.010	-0.081533	0.0467459	0.687618	0.987751	0.930-1.048	-0.0123245	0.0306512
HLA-DRB1	204_G_x	0.0811289	0.921702	0.841-1.010	-0.081533	0.0467459	0.687618	0.987751	0.930-1.048	-0.0123245	0.0306512
HLA-DRB1	205_G_x	0.0811289	0.921702	0.841-1.010	-0.081533	0.0467459	0.687618	0.987751	0.930-1.048	-0.0123245	0.0306512
HLA-DRB1	206_F_x	0.0811289	0.921702	0.841-1.010	-0.081533	0.0467459	0.687618	0.987751	0.930-1.048	-0.0123245	0.0306512
HLA-DRB1	207_V_x	0.0811289	0.921702	0.841-1.010	-0.081533	0.0467459	0.687618	0.987751	0.930-1.048	-0.0123245	0.0306512
HLA-DRB1	208_L_x	0.0811289	0.921702	0.841-1.010	-0.081533	0.0467459	0.687618	0.987751	0.930-1.048	-0.0123245	0.0306512
HLA-DRB1	209_G_x	0.0811289	0.921702	0.841-1.010	-0.081533	0.0467459	0.687618	0.987751	0.930-1.048	-0.0123245	0.0306512
HLA-DRB1	210_L_x	0.0811289	0.921702	0.841-1.010	-0.081533	0.0467459	0.687618	0.987751	0.930-1.048	-0.0123245	0.0306512
HLA-DRB1	211_L_x	0.0811289	0.921702	0.841-1.010	-0.081533	0.0467459	0.687618	0.987751	0.930-1.048	-0.0123245	0.0306512
HLA-DRB1	212_F_x	0.0811289	0.921702	0.841-1.010	-0.081533	0.0467459	0.687618	0.987751	0.930-1.048	-0.0123245	0.0306512
HLA-DRB1	213_L_x	0.0811289	0.921702	0.841-1.010	-0.081533	0.0467459	0.687618	0.987751	0.930-1.048	-0.0123245	0.0306512
HLA-DRB1	214_G_x	0.0811289	0.921702	0.841-1.010	-0.081533	0.0467459	0.687618	0.987751	0.930-1.048	-0.0123245	0.0306512
HLA-DRB1	215_A_x	0.0811289	0.921702	0.841-1.010	-0.081533	0.0467459	0.687618	0.987751	0.930-1.048	-0.0123245	0.0306512
HLA-DRB1	216_G_x	0.0811289	0.921702	0.841-1.010	-0.081533	0.0467459	0.687618	0.987751	0.930-1.048	-0.0123245	0.0306512
HLA-DRB1	217_L_x	0.0811289	0.921702	0.841-1.010	-0.081533	0.0467459	0.687618	0.987751	0.930-1.048	-0.0123245	0.0306512
HLA-DRB1	218_F_x	0.0811289	0.921702	0.841-1.010	-0.081533	0.0467459	0.687618	0.987751	0.930-1.048	-0.0123245	0.0306512
HLA-DRB1	219_I_x	0.0811289	0.921702	0.841-1.010	-0.081533	0.0467459	0.687618	0.987751	0.930-1.048	-0.0123245	0.0306512
HLA-DRB1	220_Y_x	0.0811289	0.921702	0.841-1.010	-0.081533	0.0467459	0.687618	0.987751	0.930-1.048	-0.0123245	0.0306512
HLA-DRB1	221_F_x	0.0811289	0.921702	0.841-1.010	-0.081533	0.0467459	0.687618	0.987751	0.930-1.048	-0.0123245	0.0306512
HLA-DRB1	222_R_x	0.0811289	0.921702	0.841-1.010	-0.081533	0.0467459	0.687618	0.987751	0.930-1.048	-0.0123245	0.0306512
HLA-DRB1	223_N_x	0.0811289	0.921702	0.841-1.010	-0.081533	0.0467459	0.687618	0.987751	0.930-1.048	-0.0123245	0.0306512
HLA-DRB1	224_Q_x	0.0811289	0.921702	0.841-1.010	-0.081533	0.0467459	0.687618	0.987751	0.930-1.048	-0.0123245	0.0306512
HLA-DRB1	225_K_x	0.0811289	0.921702	0.841-1.010	-0.081533	0.0467459	0.687618	0.987751	0.930-1.048	-0.0123245	0.0306512
HLA-DRB1	226_G_x	0.0811289	0.921702	0.841-1.010	-0.081533	0.0467459	0.687618	0.987751	0.930-1.048	-0.0123245	0.0306512
HLA-DRB1	227_H_x	0.0811289	0.921702	0.841-1.010	-0.081533	0.0467459	0.687618	0.987751	0.930-1.048	-0.0123245	0.0306512
HLA-DRB1	228_S_x	0.0811289	0.921702	0.841-1.010	-0.081533	0.0467459	0.687618	0.987751	0.930-1.048	-0.0123245	0.0306512
HLA-DRB1	229_G_x	0.0811289	0.921702	0.841-1.010	-0.081533	0.0467459	0.687618	0.987751	0.930-1.048	-0.0123245	0.0306512
HLA-DRB1	230_L_x	0.0811289	0.921702	0.841-1.010	-0.081533	0.0467459	0.687618	0.987751	0.930-1.048	-0.0123245	0.0306512
HLA-DRB1	231_Q	0.28107	1.04133	0.967-1.120	0.0404941	0.037567	0.411979	0.979823	0.933-1.028	-0.0203831	0.0248448
HLA-DRB1	231_x	0.0811289	0.921702	0.841-1.010	-0.081533	0.0467459	0.687618	0.987751	0.930-1.048	-0.0123245	0.0306512
HLA-DRB1	232_P_x	0.0811289	0.921702	0.841-1.010	-0.081533	0.0467459	0.687618	0.987751	0.930-1.048	-0.0123245	0.0306512
HLA-DRB1	233_R	0.992137	0.999842	0.968-1.031	-0.000157853	0.0160175	0.00419822	0.969412	0.949-0.990	-0.0310654	0.0108511
HLA-DRB1	233_T	0.784132	1.00429	0.974-1.035	0.00427859	0.0156188	0.033299	1.02271	1.001-1.044	0.0224599	0.0105522
HLA-DRB1	233_x	0.0811289	0.921702	0.841-1.010	-0.081533	0.0467459	0.687618	0.987751	0.930-1.048	-0.0123245	0.0306512
HLA-DRB1	234_G_x	0.0692758	0.919223	0.839-1.006	-0.0842267	0.0463646	0.544964	0.981744	0.924-1.042	-0.018425	0.0304382
HLA-DRB1	235_F_x	0.0692758	0.919223	0.839-1.006	-0.0842267	0.0463646	0.544964	0.981744	0.924-1.042	-0.018425	0.0304382
HLA-DRB1	236_L_x	0.0810525	0.922552	0.842-1.010	-0.0806115	0.046206	0.562871	0.98258	0.925-1.042	-0.017573	0.0303726
HLA-DRB1	237_S_x	0.0810525	0.922552	0.842-1.010	-0.0806115	0.046206	0.562871	0.98258	0.925-1.042	-0.017573	0.0303726

## Sheet: S8
Table S8. SuSiE Credible Set Results
Median r2 reported between all variants within the CS. Posterior Inclusion Probability (PIP) reported for each variant within the CS. P-value, odds ratio (OR) and confidence interval (CI) reported for the variant's association for that specific group (childhood-onset asthma or adult-onset asthma).
Region	Group	CS	Median r2	Var	PIP	p-val	OR	CI	Freq	Ref	Alt
Class I	Child	CS1	1	rs2428494	0.969131	8.76868e-23	1.15692	1.123-1.191	0.474201	T	A
	Child	CS2	0.998865	HLA-C p.11	0.573079	3.12118e-19	0.805879	0.768-0.844	0.126718	A	S
				rs28481932	0.426359	4.35884e-19	0.806755	0.769-0.845	0.126836	A	G
	Adult	CS1	1	rs2428494	0.999363	4.52389e-23	1.10394	1.082-1.125	0.474718	T	A
Class II	Child	CS1	1	rs28407950	0.997045	1.37142e-59	0.738483	0.712-0.765	0.246159	C	T
	Child	CS2	0.988548	rs35571244	0.495457	1.06998e-17	1.25296	1.189-1.319	0.0719394	T	C
				rs35599935	0.201413	3.39e-17	1.25124	1.187-1.318	0.0706245	T	C
				rs34975158	0.170831	4.72996e-17	1.2492	1.185-1.315	0.0707462	G	A
				rs4148878	0.0564228	1.59947e-16	1.24275	1.180-1.308	0.0713235	T	G
				rs33998906	0.0291661	1.4232e-15	1.24192	1.177-1.309	0.0672876	C	T
	Adult	CS1	0.992906	rs17843580	0.0781049	4.00637e-49	1.16676	1.143-1.190	0.600526	A	G
				HLA-DQB1 p.55	0.0386287	4.50398e-49	0.858422	0.841-0.876	0.409009	L,P	R
				HLA-DQA1 p.11	0.0296971	3.23072e-48	0.8587	0.841-0.876	0.390029	Y	C
				HLA-DQA1 p.18	0.0296971	3.23072e-48	0.8587	0.841-0.876	0.390029	S	F
				HLA-DQA1 p.45	0.0296971	3.23072e-48	0.8587	0.841-0.876	0.390029	V	A
				HLA-DQA1 p.47	0.0296971	3.23072e-48	0.8587	0.841-0.876	0.390029	C,K,Q	R
				HLA-DQA1 p.48	0.0296971	3.23072e-48	0.8587	0.841-0.876	0.390029	L	W
				HLA-DQA1 p.50	0.0296971	3.23072e-48	0.8587	0.841-0.876	0.390029	L,V	E
				HLA-DQA1 p.52	0.0296971	3.23072e-48	0.8587	0.841-0.876	0.390029	H,R	S
				HLA-DQA1 p.53	0.0296971	3.23072e-48	0.8587	0.841-0.876	0.390029	Q,R	K
				HLA-DQA1 p.55	0.0296971	3.23072e-48	0.8587	0.841-0.876	0.390029	R	G
				HLA-DQA1 p.56	0.0296971	3.23072e-48	0.8587	0.841-0.876	0.390029	R,x	G
				HLA-DQA1 p.61	0.0296971	3.23072e-48	0.8587	0.841-0.876	0.390029	F	G
				HLA-DQA1 p.64	0.0296971	3.23072e-48	0.8587	0.841-0.876	0.390029	T	R
				HLA-DQA1 p.66	0.0296971	3.23072e-48	0.8587	0.841-0.876	0.390029	I	M
				HLA-DQA1 p.69	0.0296971	3.23072e-48	0.8587	0.841-0.876	0.390029	L,T	A
				HLA-DQA1 p.76	0.0296971	3.23072e-48	0.8587	0.841-0.876	0.390029	L,V	M
				HLA-DQA1 p.80	0.0296971	3.23072e-48	0.8587	0.841-0.876	0.390029	S	Y
				HLA-DQA1 p.175	0.0296971	3.23072e-48	0.8587	0.841-0.876	0.390029	E,K	Q
				HLA-DQA1 p.218	0.0296971	3.23072e-48	0.8587	0.841-0.876	0.390029	R	Q
				rs17612788	0.0232172	9.67359e-49	1.16536	1.141-1.189	0.605293	G	A
				rs9273084	0.0145005	5.24503e-48	1.16378	1.140-1.187	0.60688	T	C
				HLA-DQB1 p.203	0.0139748	2.2956e-47	0.858925	0.841-0.876	0.383052	I,x	V
				rs9274660	0.0114724	7.88217e-48	1.16323	1.139-1.187	0.608226	A	G
				rs34843907	0.0100576	1.51386e-47	1.16331	1.139-1.187	0.604424	T	G
				rs17843619	0.0100363	1.1124e-47	1.16271	1.139-1.186	0.607458	C	A
				rs9272629	0.00908256	2.34481e-46	1.1612	1.137-1.185	0.59986	G	T
				rs1130034	0.00904431	1.27442e-47	1.16321	1.139-1.187	0.607576	T	C
				rs9273497	0.0089276	6.00908e-47	1.1629	1.139-1.187	0.601284	T	C
				rs17612576	0.00850051	1.15625e-47	1.16285	1.139-1.186	0.607797	G	A
				HLA-DQB1 p.84	0.00849569	3.66413e-47	0.859584	0.842-0.877	0.387366	Q,x	E
				HLA-DQB1 p.85	0.00849569	3.66413e-47	0.859584	0.842-0.877	0.387366	L,x	V
				HLA-DQB1 p.89	0.00849569	3.66413e-47	0.859584	0.842-0.877	0.387366	T,x	G
				HLA-DQB1 p.90	0.00849569	3.66413e-47	0.859584	0.842-0.877	0.387366	T,x	I
				HLA-DQB1 p.220	0.00827087	3.74776e-47	0.859598	0.842-0.877	0.387324	H,x	R
				HLA-DQB1 p.221	0.00827087	3.74776e-47	0.859598	0.842-0.877	0.387324	H,x	Q
				rs9273088	0.00796697	1.58778e-47	1.16263	1.139-1.186	0.607856	A	C
				rs3828789	0.00758262	1.35944e-47	1.1628	1.139-1.186	0.607982	G	T
				rs1140343	0.00717536	6.87745e-48	1.16414	1.140-1.188	0.603335	T	G
				rs1063349	0.00660807	1.48945e-47	1.16277	1.139-1.186	0.607568	T	C
				rs17843577	0.00655324	3.37623e-46	1.16016	1.136-1.184	0.600037	C	T
				rs9272346	0.00650297	1.97927e-47	1.16284	1.139-1.186	0.608059	G	A
				rs9273215	0.00629582	1.67272e-47	1.16257	1.139-1.186	0.607866	G	A
				rs9273329	0.00625741	1.66234e-47	1.16262	1.139-1.186	0.607935	G	A
				rs9273326	0.00619053	1.6953e-47	1.1626	1.139-1.186	0.607959	T	C
				rs17612781	0.006189	2.05832e-47	1.16253	1.139-1.186	0.607624	T	C
				rs9272625	0.00617067	3.48788e-46	1.16097	1.137-1.185	0.598756	T	C
				rs17612625	0.00606825	1.77323e-47	1.16256	1.139-1.186	0.607944	A	C
				rs17612633	0.00600602	1.79583e-47	1.16255	1.139-1.186	0.607947	G	C
				rs17843573	0.00582811	1.89489e-47	1.16251	1.139-1.186	0.607891	C	T
				rs9273493	0.00582734	1.85242e-47	1.1625	1.139-1.186	0.607871	T	C
				rs1063355	0.00570208	1.90078e-47	1.16247	1.139-1.186	0.607888	T	G
				rs9273330	0.00561517	3.82572e-47	1.16244	1.138-1.186	0.604721	C	T
				rs17612858	0.00559566	1.88709e-47	1.16255	1.139-1.186	0.607812	A	T
				rs9273524	0.00516513	2.14374e-47	1.16239	1.138-1.186	0.60792	T	C
				rs9273339	0.00482775	2.64064e-47	1.16217	1.138-1.186	0.607619	G	A
				rs17612928	0.00449557	9.47432e-47	1.16139	1.137-1.185	0.601905	A	G
				rs1063348	0.0034772	2.41576e-47	1.16239	1.138-1.186	0.605075	A	G
				rs17612802	0.00310646	8.36123e-48	1.16419	1.140-1.188	0.602013	C	T
				HLA-DQA1 p.-16	0.00297266	6.05377e-48	0.86067	0.843-0.878	0.412319	M	L
	Adult	CS2	0.95865	rs41269945	0.192935	5.07996e-47	1.1975	1.168-1.227	0.188082	A	T
				rs41269955	0.111634	1.92723e-45	1.20746	1.176-1.239	0.169211	G	A
				HLA-DQA1 p.26	0.0656286	3.63214e-47	1.1874	1.160-1.215	0.203588	T	S
				HLA-DQA1 p.47	0.0656286	3.63214e-47	1.1874	1.160-1.215	0.203588	C,K,R	Q
				HLA-DQA1 p.56	0.0656286	3.63214e-47	1.1874	1.160-1.215	0.203588	G,x	R
				HLA-DQA1 p.76	0.0656286	3.63214e-47	1.1874	1.160-1.215	0.203588	L,M	V
				HLA-DQA1 p.187	0.0656286	3.63214e-47	1.1874	1.160-1.215	0.203588	A	T
				HLA-DQA1*0301	0.0570541	6.90967e-47	1.18715	1.159-1.215	0.202219	-	-
				rs34141382	0.0559451	1.47957e-45	1.20045	1.170-1.231	0.179093	T	C
				rs1391371	0.0508977	5.74916e-47	1.18676	1.159-1.214	0.204189	A	T
				rs9272461	0.028366	1.84481e-46	1.18666	1.159-1.214	0.20291	G	A
				rs34763586	0.015791	6.01276e-45	1.19439	1.165-1.224	0.185074	T	C
				rs7760841	0.0138333	3.68812e-44	1.19608	1.166-1.226	0.175844	C	T
				rs17426593	0.013346	2.66841e-45	1.19137	1.162-1.220	0.193318	T	C
				rs35117964	0.00806962	8.12823e-43	1.18691	1.158-1.216	0.190015	A	G
				rs3104413	0.00700994	3.0682e-44	1.18423	1.156-1.212	0.192333	C	G
				rs34578704	0.00677472	7.0651e-43	1.20425	1.172-1.236	0.160745	C	A
				rs34415150	0.00581814	9.06286e-44	1.18775	1.159-1.216	0.184082	A	G
				rs9272785	0.00491071	2.92125e-44	1.18946	1.160-1.218	0.192452	G	A
				rs35265698	0.00466127	8.55429e-44	1.1835	1.155-1.212	0.19208	C	G
				rs35371668	0.00458506	2.50738e-43	1.18988	1.160-1.219	0.180279	C	T
				rs34039593	0.00450733	8.49868e-44	1.18371	1.155-1.212	0.191471	T	G
				rs35294087	0.00430864	9.9906e-44	1.18335	1.155-1.211	0.192086	A	G
				rs504594	0.00427247	8.77921e-44	1.1836	1.155-1.212	0.191428	C	A
				rs9271608	0.00414882	8.79352e-44	1.18383	1.155-1.212	0.191353	A	G
				rs3129751	0.00411401	9.40379e-44	1.18354	1.155-1.212	0.19142	A	C
				rs35118762	0.00382572	1.28929e-43	1.18303	1.155-1.211	0.192079	C	T
				HLA-DRB1 p.-24	0.00382139	2.97531e-43	1.19399	1.164-1.224	0.177599	L,x	F
				HLA-DRB1 p.33	0.00382139	2.97531e-43	1.19399	1.164-1.224	0.177599	N	H
				HLA-DRB1 p.96	0.00382139	2.97531e-43	1.19399	1.164-1.224	0.177599	E,H,Q,x	Y
				HLA-DRB1 p.180	0.00382139	2.97531e-43	1.19399	1.164-1.224	0.177599	V,x	L
				HLA-DRB1 p.13	0.0038042	2.99869e-43	1.19399	1.164-1.224	0.1776	F,G	H
				rs3997872	0.00372396	1.10809e-43	1.18336	1.155-1.211	0.191453	T	A

## Sheet: S9
Table S9: HLA Allele Frequencies by Study
Sample composition from RNAseq data collected from LCLs (Hutterites) and the PBMCs and NECs from URECA (URban Environment and Childhood Asthma). NA, not available.
Locus	Allele	Hutterites	URECA
HLA-A	01:01	0.179398	0.0451807
HLA-A	02:01	0.255787	0.129518
HLA-A	02:02	NA	0.0301205
HLA-A	02:04	NA	0.00301205
HLA-A	02:05	NA	0.0240964
HLA-A	02:11	NA	0.00301205
HLA-A	02:17	NA	0.00301205
HLA-A	02:31	NA	0.00301205
HLA-A	02:60	NA	0.00301205
HLA-A	03:01	0.137731	0.0993976
HLA-A	11:01	0.0127315	0.00903614
HLA-A	23:01	NA	0.138554
HLA-A	24:02	0.207176	0.0240964
HLA-A	25:01	NA	0.00301205
HLA-A	26:01	0.0729167	0.0060241
HLA-A	29:01	NA	0.00301205
HLA-A	29:02	NA	0.0451807
HLA-A	30:01	0.0219907	0.0421687
HLA-A	30:02	NA	0.0662651
HLA-A	30:04	NA	0.00301205
HLA-A	31:01	0.0277778	0.00903614
HLA-A	32:01	0.0694444	0.00903614
HLA-A	33:01	0.00347222	0.0301205
HLA-A	33:03	NA	0.0391566
HLA-A	34:01	0.0115741	NA
HLA-A	34:02	NA	0.0301205
HLA-A	36:01	NA	0.0150602
HLA-A	66:01	NA	0.00301205
HLA-A	66:02	NA	0.0060241
HLA-A	66:03	NA	0.00301205
HLA-A	68:01	NA	0.0391566
HLA-A	68:02	NA	0.0692771
HLA-A	68:03	NA	0.0060241
HLA-A	68:15	NA	0.00301205
HLA-A	74:01	NA	0.0512048
HLA-A	80:01	NA	0.00301205
HLA-B	07:02	0.0231481	0.0873494
HLA-B	07:05	NA	0.00903614
HLA-B	08:01	0.0868056	0.0542169
HLA-B	13:02	0.0752315	0.0150602
HLA-B	14:01	NA	0.0150602
HLA-B	14:02	NA	0.0180723
HLA-B	14:03	NA	0.00301205
HLA-B	15:01	0.0335648	NA
HLA-B	15:03	NA	0.0783133
HLA-B	15:10	NA	0.0391566
HLA-B	15:16	NA	0.00301205
HLA-B	15:17	NA	0.00301205
HLA-B	15:18	NA	0.00301205
HLA-B	15:39	0.0243056	NA
HLA-B	15:54	NA	0.00301205
HLA-B	18:01	0.0243056	0.0451807
HLA-B	27:03	NA	0.00301205
HLA-B	27:05	0.00231481	0.00903614
HLA-B	27:08	0.0740741	NA
HLA-B	35:01	0.0833333	0.0572289
HLA-B	35:03	0.00810185	NA
HLA-B	35:05	NA	0.00301205
HLA-B	35:08	0.0671296	NA
HLA-B	35:12	NA	0.00301205
HLA-B	37:01	NA	0.0150602
HLA-B	38:01	0.0416667	0.00301205
HLA-B	39:08	NA	0.00301205
HLA-B	39:10	NA	0.0060241
HLA-B	40:01	0.0775463	0.0150602
HLA-B	40:02	NA	0.00903614
HLA-B	40:16	NA	0.00301205
HLA-B	41:01	NA	0.00301205
HLA-B	41:02	NA	0.00301205
HLA-B	41:03	NA	0.00301205
HLA-B	42:01	NA	0.060241
HLA-B	42:02	NA	0.00903614
HLA-B	44:02	0.0127315	0.0150602
HLA-B	44:03	NA	0.0542169
HLA-B	45:01	NA	0.0331325
HLA-B	48:02	NA	0.00301205
HLA-B	49:01	NA	0.0331325
HLA-B	50:01	0.00347222	NA
HLA-B	51:01	0.18287	0.0240964
HLA-B	52:01	NA	0.0150602
HLA-B	53:01	NA	0.0993976
HLA-B	56:01	0.0162037	NA
HLA-B	57:01	0.0868056	0.00301205
HLA-B	57:02	NA	0.0060241
HLA-B	57:03	NA	0.0421687
HLA-B	57:04	NA	0.00301205
HLA-B	58:01	NA	0.0210843
HLA-B	58:02	NA	0.0331325
HLA-B	78:01	NA	0.0180723
HLA-B	81:01	NA	0.0120482
HLA-C	01:02	0.0706019	0.0120482
HLA-C	02:02	0.0532407	0.00903614
HLA-C	02:10	NA	0.0813253
HLA-C	03:02	0.00347222	0.0120482
HLA-C	03:03	0.0173611	0.00301205
HLA-C	03:04	0.109954	0.0572289
HLA-C	03:05	NA	0.0060241
HLA-C	04:01	0.127315	0.156627
HLA-C	05:01	0.056713	0.0301205
HLA-C	06:02	0.164352	0.0753012
HLA-C	07:01	0.0729167	0.159639
HLA-C	07:02	0.0393519	0.0722892
HLA-C	07:04	NA	0.0060241
HLA-C	08:02	NA	0.0391566
HLA-C	08:04	NA	0.0120482
HLA-C	12:03	0.146991	0.0150602
HLA-C	14:02	0.0694444	0.0060241
HLA-C	14:03	NA	0.00301205
HLA-C	15:02	NA	0.0120482
HLA-C	15:05	NA	0.0301205
HLA-C	16:01	0.03125	0.0843373
HLA-C	16:02	NA	0.00301205
HLA-C	17:01	NA	0.0753012
HLA-C	18:01	NA	0.0361446
HLA-C	18:04	NA	0.00301205
HLA-DQA1	01:01	0.219907	0.108434
HLA-DQA1	01:02	0.108796	0.259036
HLA-DQA1	01:03	0.0613426	0.0361446
HLA-DQA1	02:01	0.128472	0.13253
HLA-DQA1	03:01	0.196759	0.135542
HLA-DQA1	04:01	0.0555556	0.0933735
HLA-DQA1	05:01	0.229167	0.23494
HLA-DQB1	02:01	0.175926	0.253012
HLA-DQB1	03:01	0.189815	0.177711
HLA-DQB1	03:02	0.0625	0.0662651
HLA-DQB1	03:03	0.0891204	0.0240964
HLA-DQB1	03:132	NA	0.00301205
HLA-DQB1	04:02	0.0833333	0.0692771
HLA-DQB1	05:01	0.217593	0.111446
HLA-DQB1	05:02	0.0127315	0.0301205
HLA-DQB1	05:03	NA	0.0180723
HLA-DQB1	06:02	0.0960648	0.159639
HLA-DQB1	06:03	0.0613426	0.0180723
HLA-DQB1	06:04	NA	0.0301205
HLA-DQB1	06:08	NA	0.00301205
HLA-DQB1	06:09	NA	0.0301205
HLA-DRB1	01:01	0.144676	0.0180723
HLA-DRB1	01:02	NA	0.0271084
HLA-DRB1	01:03	NA	0.00301205
HLA-DRB1	03:01	0.116898	0.0873494
HLA-DRB1	03:02	NA	0.0542169
HLA-DRB1	04:01	0.114583	0.0150602
HLA-DRB1	04:02	NA	0.00301205
HLA-DRB1	04:03	0.00231481	0.00301205
HLA-DRB1	04:04	0.0439815	0.0120482
HLA-DRB1	04:05	0.0185185	0.0210843
HLA-DRB1	04:07	NA	0.0120482
HLA-DRB1	04:08	NA	0.00301205
HLA-DRB1	04:10	NA	0.00301205
HLA-DRB1	04:11	NA	0.00903614
HLA-DRB1	07:01	0.128472	0.11747
HLA-DRB1	07:11	NA	0.00301205
HLA-DRB1	08:01	NA	0.00301205
HLA-DRB1	08:02	NA	0.00301205
HLA-DRB1	08:03	0.0520833	NA
HLA-DRB1	08:04	NA	0.0542169
HLA-DRB1	08:06	NA	0.0060241
HLA-DRB1	09:01	NA	0.0361446
HLA-DRB1	10:01	0.0659722	0.0180723
HLA-DRB1	11:01	0.111111	0.0753012
HLA-DRB1	11:02	NA	0.0240964
HLA-DRB1	11:04	NA	0.0060241
HLA-DRB1	11:08	0.00115741	NA
HLA-DRB1	12:01	NA	0.0301205
HLA-DRB1	13:01	0.0613426	0.0481928
HLA-DRB1	13:02	NA	0.063253
HLA-DRB1	13:03	NA	0.0451807
HLA-DRB1	13:04	NA	0.0120482
HLA-DRB1	13:31	NA	0.00301205
HLA-DRB1	14:01	NA	0.0210843
HLA-DRB1	15:01	0.09375	0.0210843
HLA-DRB1	15:03	NA	0.120482
HLA-DRB1	15:13	NA	0.00301205
HLA-DRB1	16:01	0.0127315	NA
HLA-DRB1	16:02	NA	0.0120482
HLA-DRB1	16:34	NA	0.00301205

## Sheet: S10
Table S10: List of SNPs in the Credible Sets Excluded From eQTL Analyses
SNPs noted if there was high missingness or if it failed QC for other reasons (e.g. failed HWE)
Group	CS	rsid	Hutterites (LCL)	URECA (PBMC and NEC)
Class I Adult/Child	CS1	rs2428494
Class I Child	CS2	rs28481932	high missingness
Class II Child	CS1	rs28407950	high missingness
Class II Child	CS2	rs35571244		failed QC
		rs35599935
		rs34975158
		rs4148878
		rs33998906
Class II Adult	CS1	rs17843580	high missingness
		rs17612788	high missingness
		rs9273084	high missingness
		rs9274660
		rs34843907		failed QC
		rs17843619	high missingness
		rs9272629	high missingness	failed QC
		rs1130034	failed QC	failed QC
		rs9273497	high missingness
		rs17612576	high missingness
		rs9273088	high missingness
		rs3828789	high missingness
		rs1140343	high missingness	failed QC
		rs1063349	high missingness	failed QC
		rs17843577	high missingness
		rs9272346
		rs9273215	failed QC	failed QC
		rs9273329	high missingness
		rs9273326	high missingness
		rs17612781	high missingness
		rs9272625	high missingness	failed QC
		rs17612625	high missingness
		rs17612633	high missingness
		rs17843573	high missingness
		rs9273493	high missingness
		rs1063355	high missingness
		rs9273330	high missingness
		rs17612858	high missingness
		rs9273524	high missingness
		rs9273339	high missingness
		rs17612928	failed QC	failed QC
		rs1063348	high missingness	failed QC
		rs17612802	high missingness
	CS2	rs41269945	high missingness	failed QC
		rs41269955	failed QC	failed QC
		rs34141382	high missingness	failed QC
		rs1391371
		rs9272461	high missingness	failed QC
		rs34763586	high missingness	failed QC
		rs7760841	failed QC
		rs17426593	high missingness	failed QC
		rs35117964	high missingness	failed QC
		rs3104413	high missingness
		rs34578704	failed QC	failed QC
		rs34415150	high missingness
		rs9272785	failed QC	failed QC
		rs35265698	high missingness
		rs35371668
		rs34039593	high missingness
		rs35294087	high missingness
		rs504594	failed QC
		rs9271608	high missingness
		rs3129751
		rs35118762	high missingness
		rs3997872	high missingness

## Sheet: S11
Table S11: eQTL Results for All Credible Set SNPs
P-values are shown for each SNP/gene that have an FDR<0.05. ˠgenotypes in subset of individuals from MEGA array. *genotypes from subset of individuals (see Methods)
CS	SNP	Cell	gene	p
Class I COA AOA CS1	rs2428494	LCL	HLA-B	0.0011
Class I COA AOA CS1	rs2428494	LCL	MIR6891	1.66e-08
Class I COA CS2	rs28481932*	LCL	CCHCR1	1.83171e-06
Class I COA CS2	rs28481932*	LCL	AL662844.4	3.06487e-05
Class II COA CS1	rs28407950*	LCL	HLA-DQA2	2.16396e-17
Class II COA CS1	rs28407950*	LCL	HLA-DQB2	5.15316e-17
Class II COA CS1	rs28407950*	LCL	HLA-DRB5	6.74959e-06
Class II COA CS1	rs28407950*	LCL	HLA-DQB1-AS1	5.19203e-05
Class II AOA CS1	rs34843907	LCL	HLA-DQA2	1.51e-50
Class II AOA CS1	rs9272346	LCL	HLA-DQA2	4.05e-54
Class II AOA CS1	rs9274660	LCL	HLA-DQA2	7.86e-50
Class II AOA CS1	rs34843907	LCL	HLA-DQB2	2.31e-66
Class II AOA CS1	rs9272346	LCL	HLA-DQB2	3.26e-73
Class II AOA CS1	rs9274660	LCL	HLA-DQB2	5.88e-59
Class II AOA CS1	rs34843907	LCL	HLA-DRB6	7.54e-20
Class II AOA CS1	rs9272346	LCL	HLA-DRB6	1.23e-21
Class II AOA CS1	rs9274660	LCL	HLA-DRB6	3.11e-19
Class II AOA CS1	rs34843907	LCL	HLA-DRB9	4.57e-06
Class II AOA CS1	rs9272346	LCL	HLA-DRB9	1.67e-06
Class II AOA CS1	rs9274660	LCL	HLA-DRB9	1.41e-06
Class II AOA CS1	rs34843907	LCL	TAP2	4.57e-05
Class II AOA CS1	rs9272346	LCL	TAP2	0.000197614
Class II AOA CS1	rs9274660	LCL	TAP2	1.35e-05
Class II AOA CS2	rs1391371	LCL	HLA-DQA2	6.16e-26
Class II AOA CS2	rs3129751	LCL	HLA-DQA2	9.92e-20
Class II AOA CS2	rs35371668	LCL	HLA-DQA2	6.43e-25
Class II AOA CS2	rs1391371	LCL	HLA-DQB2	1.68e-12
Class II AOA CS2	rs3129751	LCL	HLA-DQB2	2.35e-10
Class II AOA CS2	rs35371668	LCL	HLA-DQB2	4.05e-12
Class II AOA CS2	rs1391371	LCL	HLA-DRB5	1.16e-10
Class II AOA CS2	rs3129751	LCL	HLA-DRB5	2.09e-11
Class II AOA CS2	rs35371668	LCL	HLA-DRB5	2.13e-11
Class II AOA CS2	rs1391371	LCL	HLA-DRB6	7.81e-10
Class II AOA CS2	rs3129751	LCL	HLA-DRB6	5.6e-08
Class II AOA CS2	rs35371668	LCL	HLA-DRB6	1.05e-09
Class II AOA CS2	rs1391371	LCL	PPT2	1.08e-05
Class II AOA CS2	rs3129751	LCL	PPT2	1.33e-06
Class II AOA CS2	rs35371668	LCL	PPT2	1.26e-05
Class II AOA CS2	rs1391371	LCL	TAP1	0.00087448
Class II AOA CS2	rs35371668	LCL	TAP1	0.000942876
Class II COA CS2	rs33998906	LCL	HLA-DPB2	0.000475977
Class II COA CS2	rs34975158	LCL	HLA-DPB2	1.41e-05
Class II COA CS2	rs35599935	LCL	HLA-DPB2	7.28e-06
Class II COA CS2	rs4148878	LCL	HLA-DPB2	6.17e-07
Class II COA CS2	rs33998906	LCL	HLA-DQA2	0.000333693
Class II COA CS2	rs35571244	LCL	HLA-DRB9	0.000161697
Class II COA CS2	rs33998906	LCL	PSMB9	0.000623463
Class II COA CS2	rs35571244	LCL	TAP2	5.23e-05
Class I COA AOA CS1	rs2428494ˠ	NEC	HLA-B	0.00624
Class II AOA CS1	rs1063355	NEC	HLA-DQA2	2.83e-21
Class II AOA CS1	rs17612576	NEC	HLA-DQA2	1.56e-21
Class II AOA CS1	rs17612625	NEC	HLA-DQA2	1.56e-21
Class II AOA CS1	rs17612633	NEC	HLA-DQA2	1.56e-21
Class II AOA CS1	rs17612781	NEC	HLA-DQA2	1.56e-21
Class II AOA CS1	rs17612788	NEC	HLA-DQA2	1.56e-21
Class II AOA CS1	rs17612802	NEC	HLA-DQA2	1.56e-21
Class II AOA CS1	rs17612858	NEC	HLA-DQA2	1.55e-21
Class II AOA CS1	rs17843573	NEC	HLA-DQA2	1.56e-21
Class II AOA CS1	rs17843577	NEC	HLA-DQA2	1.56e-21
Class II AOA CS1	rs17843580	NEC	HLA-DQA2	1.56e-21
Class II AOA CS1	rs17843619	NEC	HLA-DQA2	3.41e-17
Class II AOA CS1	rs3828789	NEC	HLA-DQA2	1.55e-21
Class II AOA CS1	rs9272346	NEC	HLA-DQA2	1.79e-22
Class II AOA CS1	rs9273084	NEC	HLA-DQA2	1.56e-21
Class II AOA CS1	rs9273088	NEC	HLA-DQA2	1.48e-18
Class II AOA CS1	rs9273326	NEC	HLA-DQA2	1.56e-21
Class II AOA CS1	rs9273329	NEC	HLA-DQA2	1.56e-21
Class II AOA CS1	rs9273330	NEC	HLA-DQA2	1.56e-21
Class II AOA CS1	rs9273339	NEC	HLA-DQA2	1.56e-21
Class II AOA CS1	rs9273493	NEC	HLA-DQA2	4.68e-13
Class II AOA CS1	rs9273497	NEC	HLA-DQA2	2.1e-15
Class II AOA CS1	rs9273524	NEC	HLA-DQA2	1.38e-19
Class II AOA CS1	rs9274660	NEC	HLA-DQA2	1.56e-21
Class II AOA CS1	rs1063355	NEC	HLA-DQB1	9.08e-15
Class II AOA CS1	rs17612576	NEC	HLA-DQB1	1.33e-14
Class II AOA CS1	rs17612625	NEC	HLA-DQB1	1.33e-14
Class II AOA CS1	rs17612633	NEC	HLA-DQB1	1.33e-14
Class II AOA CS1	rs17612781	NEC	HLA-DQB1	1.33e-14
Class II AOA CS1	rs17612788	NEC	HLA-DQB1	1.33e-14
Class II AOA CS1	rs17612802	NEC	HLA-DQB1	1.33e-14
Class II AOA CS1	rs17612858	NEC	HLA-DQB1	1.33e-14
Class II AOA CS1	rs17843573	NEC	HLA-DQB1	1.33e-14
Class II AOA CS1	rs17843577	NEC	HLA-DQB1	1.33e-14
Class II AOA CS1	rs17843580	NEC	HLA-DQB1	1.33e-14
Class II AOA CS1	rs17843619	NEC	HLA-DQB1	1.71e-14
Class II AOA CS1	rs3828789	NEC	HLA-DQB1	1.33e-14
Class II AOA CS1	rs9272346	NEC	HLA-DQB1	1.24e-13
Class II AOA CS1	rs9273084	NEC	HLA-DQB1	1.33e-14
Class II AOA CS1	rs9273088	NEC	HLA-DQB1	1.18e-12
Class II AOA CS1	rs9273326	NEC	HLA-DQB1	1.33e-14
Class II AOA CS1	rs9273329	NEC	HLA-DQB1	1.33e-14
Class II AOA CS1	rs9273330	NEC	HLA-DQB1	1.33e-14
Class II AOA CS1	rs9273339	NEC	HLA-DQB1	1.33e-14
Class II AOA CS1	rs9273493	NEC	HLA-DQB1	1.88e-15
Class II AOA CS1	rs9273497	NEC	HLA-DQB1	9.04e-15
Class II AOA CS1	rs9273524	NEC	HLA-DQB1	1.07e-13
Class II AOA CS1	rs9274660	NEC	HLA-DQB1	1.33e-14
Class II AOA CS1	rs1063355	NEC	HLA-DQB2	8.09e-30
Class II AOA CS1	rs17612576	NEC	HLA-DQB2	4.99e-30
Class II AOA CS1	rs17612625	NEC	HLA-DQB2	4.99e-30
Class II AOA CS1	rs17612633	NEC	HLA-DQB2	4.99e-30
Class II AOA CS1	rs17612781	NEC	HLA-DQB2	4.99e-30
Class II AOA CS1	rs17612788	NEC	HLA-DQB2	4.99e-30
Class II AOA CS1	rs17612802	NEC	HLA-DQB2	4.99e-30
Class II AOA CS1	rs17612858	NEC	HLA-DQB2	4.98e-30
Class II AOA CS1	rs17843573	NEC	HLA-DQB2	4.99e-30
Class II AOA CS1	rs17843577	NEC	HLA-DQB2	4.99e-30
Class II AOA CS1	rs17843580	NEC	HLA-DQB2	4.99e-30
Class II AOA CS1	rs17843619	NEC	HLA-DQB2	1.89e-25
Class II AOA CS1	rs3828789	NEC	HLA-DQB2	5.05e-30
Class II AOA CS1	rs9272346	NEC	HLA-DQB2	2.22e-27
Class II AOA CS1	rs9273084	NEC	HLA-DQB2	4.99e-30
Class II AOA CS1	rs9273088	NEC	HLA-DQB2	1.76e-29
Class II AOA CS1	rs9273326	NEC	HLA-DQB2	4.99e-30
Class II AOA CS1	rs9273329	NEC	HLA-DQB2	4.99e-30
Class II AOA CS1	rs9273330	NEC	HLA-DQB2	4.99e-30
Class II AOA CS1	rs9273339	NEC	HLA-DQB2	4.99e-30
Class II AOA CS1	rs9273493	NEC	HLA-DQB2	2.47e-23
Class II AOA CS1	rs9273497	NEC	HLA-DQB2	2.19e-25
Class II AOA CS1	rs9273524	NEC	HLA-DQB2	2.29e-29
Class II AOA CS1	rs9274660	NEC	HLA-DQB2	4.99e-30
Class II AOA CS1	rs1063355	NEC	HLA-DRB6	1.77e-07
Class II AOA CS1	rs17612576	NEC	HLA-DRB6	1.3e-07
Class II AOA CS1	rs17612625	NEC	HLA-DRB6	1.3e-07
Class II AOA CS1	rs17612633	NEC	HLA-DRB6	1.3e-07
Class II AOA CS1	rs17612781	NEC	HLA-DRB6	1.3e-07
Class II AOA CS1	rs17612788	NEC	HLA-DRB6	1.3e-07
Class II AOA CS1	rs17612802	NEC	HLA-DRB6	1.3e-07
Class II AOA CS1	rs17612858	NEC	HLA-DRB6	1.3e-07
Class II AOA CS1	rs17843573	NEC	HLA-DRB6	1.3e-07
Class II AOA CS1	rs17843577	NEC	HLA-DRB6	1.3e-07
Class II AOA CS1	rs17843580	NEC	HLA-DRB6	1.3e-07
Class II AOA CS1	rs17843619	NEC	HLA-DRB6	8.55e-07
Class II AOA CS1	rs3828789	NEC	HLA-DRB6	1.3e-07
Class II AOA CS1	rs9272346	NEC	HLA-DRB6	1.28e-07
Class II AOA CS1	rs9273084	NEC	HLA-DRB6	1.3e-07
Class II AOA CS1	rs9273088	NEC	HLA-DRB6	2.74e-07
Class II AOA CS1	rs9273326	NEC	HLA-DRB6	1.3e-07
Class II AOA CS1	rs9273329	NEC	HLA-DRB6	1.3e-07
Class II AOA CS1	rs9273330	NEC	HLA-DRB6	1.3e-07
Class II AOA CS1	rs9273339	NEC	HLA-DRB6	1.3e-07
Class II AOA CS1	rs9273493	NEC	HLA-DRB6	1.93e-05
Class II AOA CS1	rs9273497	NEC	HLA-DRB6	3e-06
Class II AOA CS1	rs9273524	NEC	HLA-DRB6	2.94e-07
Class II AOA CS1	rs9274660	NEC	HLA-DRB6	1.3e-07
Class II AOA CS2	rs3104413	NEC	HLA-DQA1	3.41e-05
Class II AOA CS2	rs3129751	NEC	HLA-DQA1	8.85e-06
Class II AOA CS2	rs3997872	NEC	HLA-DQA1	8.85e-06
Class II AOA CS2	rs504594	NEC	HLA-DQA1	8.85e-06
Class II AOA CS2	rs7760841	NEC	HLA-DQA1	4.2e-05
Class II AOA CS2	rs9271608	NEC	HLA-DQA1	3.41e-05
Class II AOA CS2	rs1391371	NEC	HLA-DQA2	2.23e-14
Class II AOA CS2	rs3104413	NEC	HLA-DQA2	1.69e-15
Class II AOA CS2	rs3129751	NEC	HLA-DQA2	4.83e-15
Class II AOA CS2	rs34039593	NEC	HLA-DQA2	3.07e-07
Class II AOA CS2	rs34415150	NEC	HLA-DQA2	4.68e-07
Class II AOA CS2	rs35118762	NEC	HLA-DQA2	4.68e-07
Class II AOA CS2	rs35265698	NEC	HLA-DQA2	4.68e-07
Class II AOA CS2	rs35294087	NEC	HLA-DQA2	4.68e-07
Class II AOA CS2	rs35371668	NEC	HLA-DQA2	4.14e-07
Class II AOA CS2	rs3997872	NEC	HLA-DQA2	4.83e-15
Class II AOA CS2	rs504594	NEC	HLA-DQA2	4.83e-15
Class II AOA CS2	rs7760841	NEC	HLA-DQA2	4.83e-15
Class II AOA CS2	rs9271608	NEC	HLA-DQA2	1.69e-15
Class II COA CS1	rs28407950	NEC	HLA-DQB2	4.57e-13
Class II AOA CS1	rs1063355	PBMC	HLA-DQA2	5.73e-08
Class II AOA CS1	rs17612576	PBMC	HLA-DQA2	5.44e-08
Class II AOA CS1	rs17612625	PBMC	HLA-DQA2	5.44e-08
Class II AOA CS1	rs17612633	PBMC	HLA-DQA2	5.44e-08
Class II AOA CS1	rs17612781	PBMC	HLA-DQA2	5.44e-08
Class II AOA CS1	rs17612788	PBMC	HLA-DQA2	5.44e-08
Class II AOA CS1	rs17612802	PBMC	HLA-DQA2	5.44e-08
Class II AOA CS1	rs17612858	PBMC	HLA-DQA2	5.11e-08
Class II AOA CS1	rs17843573	PBMC	HLA-DQA2	5.44e-08
Class II AOA CS1	rs17843577	PBMC	HLA-DQA2	5.44e-08
Class II AOA CS1	rs17843580	PBMC	HLA-DQA2	5.44e-08
Class II AOA CS1	rs17843619	PBMC	HLA-DQA2	2.29e-06
Class II AOA CS1	rs3828789	PBMC	HLA-DQA2	4.94e-08
Class II AOA CS1	rs9272346	PBMC	HLA-DQA2	3.26e-08
Class II AOA CS1	rs9273084	PBMC	HLA-DQA2	5.44e-08
Class II AOA CS1	rs9273088	PBMC	HLA-DQA2	7.42e-06
Class II AOA CS1	rs9273326	PBMC	HLA-DQA2	5.44e-08
Class II AOA CS1	rs9273329	PBMC	HLA-DQA2	5.44e-08
Class II AOA CS1	rs9273330	PBMC	HLA-DQA2	5.44e-08
Class II AOA CS1	rs9273339	PBMC	HLA-DQA2	5.6e-08
Class II AOA CS1	rs9273493	PBMC	HLA-DQA2	2.8e-05
Class II AOA CS1	rs9273497	PBMC	HLA-DQA2	1.27e-06
Class II AOA CS1	rs9273524	PBMC	HLA-DQA2	2.69e-07
Class II AOA CS1	rs9274660	PBMC	HLA-DQA2	5.44e-08
Class II AOA CS1	rs1063355	PBMC	HLA-DQB2	1.37e-09
Class II AOA CS1	rs17612576	PBMC	HLA-DQB2	1.04e-09
Class II AOA CS1	rs17612625	PBMC	HLA-DQB2	1.04e-09
Class II AOA CS1	rs17612633	PBMC	HLA-DQB2	1.04e-09
Class II AOA CS1	rs17612781	PBMC	HLA-DQB2	1.04e-09
Class II AOA CS1	rs17612788	PBMC	HLA-DQB2	1.04e-09
Class II AOA CS1	rs17612802	PBMC	HLA-DQB2	1.04e-09
Class II AOA CS1	rs17612858	PBMC	HLA-DQB2	7e-10
Class II AOA CS1	rs17843573	PBMC	HLA-DQB2	1.04e-09
Class II AOA CS1	rs17843577	PBMC	HLA-DQB2	1.04e-09
Class II AOA CS1	rs17843580	PBMC	HLA-DQB2	1.04e-09
Class II AOA CS1	rs17843619	PBMC	HLA-DQB2	5.4e-08
Class II AOA CS1	rs3828789	PBMC	HLA-DQB2	9.31e-10
Class II AOA CS1	rs9272346	PBMC	HLA-DQB2	5.26e-10
Class II AOA CS1	rs9273084	PBMC	HLA-DQB2	1.04e-09
Class II AOA CS1	rs9273088	PBMC	HLA-DQB2	3.85e-07
Class II AOA CS1	rs9273326	PBMC	HLA-DQB2	1.04e-09
Class II AOA CS1	rs9273329	PBMC	HLA-DQB2	1.04e-09
Class II AOA CS1	rs9273330	PBMC	HLA-DQB2	1.04e-09
Class II AOA CS1	rs9273339	PBMC	HLA-DQB2	1.25e-09
Class II AOA CS1	rs9273493	PBMC	HLA-DQB2	1.95e-07
Class II AOA CS1	rs9273497	PBMC	HLA-DQB2	6.95e-08
Class II AOA CS1	rs9273524	PBMC	HLA-DQB2	2.82e-09
Class II AOA CS1	rs9274660	PBMC	HLA-DQB2	1.04e-09
Class II AOA CS1	rs1063355	PBMC	HLA-DRB6	2.34e-05
Class II AOA CS1	rs17612576	PBMC	HLA-DRB6	5.72e-05
Class II AOA CS1	rs17612625	PBMC	HLA-DRB6	5.72e-05
Class II AOA CS1	rs17612633	PBMC	HLA-DRB6	5.72e-05
Class II AOA CS1	rs17612781	PBMC	HLA-DRB6	5.72e-05
Class II AOA CS1	rs17612788	PBMC	HLA-DRB6	5.72e-05
Class II AOA CS1	rs17612802	PBMC	HLA-DRB6	5.72e-05
Class II AOA CS1	rs17612858	PBMC	HLA-DRB6	5.53e-05
Class II AOA CS1	rs17843573	PBMC	HLA-DRB6	5.72e-05
Class II AOA CS1	rs17843577	PBMC	HLA-DRB6	5.72e-05
Class II AOA CS1	rs17843580	PBMC	HLA-DRB6	5.72e-05
Class II AOA CS1	rs17843619	PBMC	HLA-DRB6	7.46e-05
Class II AOA CS1	rs3828789	PBMC	HLA-DRB6	6.19e-05
Class II AOA CS1	rs9272346	PBMC	HLA-DRB6	8.11e-05
Class II AOA CS1	rs9273084	PBMC	HLA-DRB6	5.72e-05
Class II AOA CS1	rs9273326	PBMC	HLA-DRB6	5.72e-05
Class II AOA CS1	rs9273329	PBMC	HLA-DRB6	5.72e-05
Class II AOA CS1	rs9273330	PBMC	HLA-DRB6	5.72e-05
Class II AOA CS1	rs9273339	PBMC	HLA-DRB6	4.85e-05
Class II AOA CS1	rs9273493	PBMC	HLA-DRB6	5.8e-05
Class II AOA CS1	rs9273497	PBMC	HLA-DRB6	7.99e-05
Class II AOA CS1	rs9273524	PBMC	HLA-DRB6	3.76e-05
Class II AOA CS1	rs9274660	PBMC	HLA-DRB6	5.72e-05
Class II AOA CS2	rs1391371	PBMC	HLA-DQA2	0.000224099
Class II AOA CS2	rs3104413	PBMC	HLA-DQA2	0.000251591
Class II AOA CS2	rs3129751	PBMC	HLA-DQA2	5.81e-05
Class II AOA CS2	rs3997872	PBMC	HLA-DQA2	5.81e-05
Class II AOA CS2	rs504594	PBMC	HLA-DQA2	5.81e-05
Class II AOA CS2	rs7760841	PBMC	HLA-DQA2	0.000251591
Class II AOA CS2	rs9271608	PBMC	HLA-DQA2	0.000251591
Class II COA CS1	rs28407950	PBMC	HLA-DQA2	1.4e-05
Class II COA CS1	rs28407950	PBMC	HLA-DQB2	2.6e-06

## Sheet: S13
Table S13: eQTL Fine-Mapping Results
SNPs in adult-onset asthma (AOA) class II CS1 that overlap with class II eQTL credible sets are shown with their PIPs. SNPs highlighted in green are shared with the class II AOA CS1.
LCL: HLA-DQB2
rsid	PIP
rs9272346	0.34114
rs3104367	0.34114
rs34843907	0.106358
rs9272634	0.106358
rs9272756	0.106358
LCL: HLA-DQA2
rsid	PIP
rs9272346	0.359057
rs3104367	0.359057
rs34843907	0.0922482
rs9272634	0.0922482
rs9272756	0.0922482
PBMC: HLA-DQB2
rsid	PIP
rs3134993	0.0154028
rs17612858	0.0124736
rs9273046	0.0115762
rs9272346	0.00842561
rs9273084	0.00842561
rs17843573	0.00842561
rs17612576	0.00842561
rs17843577	0.00842561
rs17843580	0.00842561
rs17612625	0.00842561
rs17612633	0.00842561
rs17612781	0.00842561
rs17612788	0.00842561
rs17612802	0.00842561
rs9273326	0.00842561
rs9273329	0.00842561
rs9273330	0.00842561
rs3828789	0.00842561
rs9274660	0.00842561
rs3104367	0.00842561
rs9272355	0.00842561
rs5002184	0.00842561
rs5002183	0.00842561
rs5002182	0.00842561
rs9273013	0.00842561
rs9273024	0.00842561
rs9273027	0.00842561
rs9273030	0.00842561
rs9273033	0.00842561
rs9273034	0.00842561
rs9273038	0.00842561
rs9273043	0.00842561
rs9273053	0.00842561
rs9273056	0.00842561
rs9273065	0.00842561
rs9273066	0.00842561
rs9273069	0.00842561
rs9273074	0.00842561
rs9273075	0.00842561
rs9273078	0.00842561
rs9273081	0.00842561
rs9273082	0.00842561
rs9273083	0.00842561
rs9273146	0.00842561
rs9273147	0.00842561
rs9273172	0.00842561
rs9279948	0.00842561
rs9273242	0.00842561
rs9273243	0.00842561
rs9273244	0.00842561
rs9273245	0.00842561
rs17843575	0.00842561
rs17843576	0.00842561
rs17612562	0.00842561
rs17612583	0.00842561
rs17843578	0.00842561
rs17843579	0.00842561
rs17612590	0.00842561
rs17612597	0.00842561
rs17612604	0.00842561
rs17612610	0.00842561
rs17612617	0.00842561
rs17843581	0.00842561
rs17843582	0.00842561
rs17843583	0.00842561
rs17843584	0.00842561
rs201979949	0.00842561
rs762118514	0.00842561
rs371932901	0.00842561
rs578137727	0.00842561
rs9273322	0.00842561
rs9273328	0.00842561
rs9273331	0.00842561
rs9273332	0.00842561
rs9273333	0.00842561
rs9282067	0.00842561
rs9282068	0.00842561
rs9273335	0.00842561
rs9273337	0.00842561
rs9273338	0.00842561
rs9273344	0.00842561
rs9273346	0.00842561
rs9273348	0.00842561
rs9273372	0.00842561
rs9273373	0.00842561
rs9273374	0.00842561
rs9273417	0.00842561
rs9273418	0.00842561
rs9273419	0.00842561
rs9273430	0.00842561
rs9273444	0.00842561
rs9273445	0.00842561
rs9273482	0.00842561
rs9273483	0.00842561
rs9273532	0.00842561
rs9273533	0.00842561
rs9274501	0.00842561
rs796429679	0.00842561
rs9274506	0.00842561
rs9274510	0.00842561
rs1049060	0.00842561
rs1049057	0.00842561
rs9274529	0.00842561
rs9274562	0.00842561
rs9274564	0.00842561
rs9274565	0.00842561
rs9274573	0.00842561
rs9274575	0.00842561
rs3828790	0.00842561
rs3828791	0.00842561
rs3828798	0.00842561
rs3828806	0.00842561
rs3828807	0.00842561
rs3828811	0.00842561
PBMC: HLA-DQA2
rsid	PIP
rs5002178	0.221627
rs9273339	0.0105397
rs9273046	0.00780108
rs3134993	0.00735593
rs17612858	0.00708431
rs9272346	0.00618738
rs9273084	0.00618738
rs17843573	0.00618738
rs17612576	0.00618738
rs17843577	0.00618738
rs17843580	0.00618738
rs17612625	0.00618738
rs17612633	0.00618738
rs17612781	0.00618738
rs17612788	0.00618738
rs17612802	0.00618738
rs9273326	0.00618738
rs9273329	0.00618738
rs9273330	0.00618738
rs3828789	0.00618738
rs9274660	0.00618738
rs3104367	0.00618738
rs9272355	0.00618738
rs5002184	0.00618738
rs5002183	0.00618738
rs5002182	0.00618738
rs9273013	0.00618738
rs9273024	0.00618738
rs9273027	0.00618738
rs9273030	0.00618738
rs9273033	0.00618738
rs9273034	0.00618738
rs9273038	0.00618738
rs9273043	0.00618738
rs9273053	0.00618738
rs9273056	0.00618738
rs9273065	0.00618738
rs9273066	0.00618738
rs9273069	0.00618738
rs9273074	0.00618738
rs9273075	0.00618738
rs9273078	0.00618738
rs9273081	0.00618738
rs9273082	0.00618738
rs9273083	0.00618738
rs9273146	0.00618738
rs9273147	0.00618738
rs9273172	0.00618738
rs9279948	0.00618738
rs9273242	0.00618738
rs9273243	0.00618738
rs9273244	0.00618738
rs9273245	0.00618738
rs17843575	0.00618738
rs17843576	0.00618738
rs17612562	0.00618738
rs17612583	0.00618738
rs17843578	0.00618738
rs17843579	0.00618738
rs17612590	0.00618738
rs17612597	0.00618738
rs17612604	0.00618738
rs17612610	0.00618738
rs17612617	0.00618738
rs17843581	0.00618738
rs17843582	0.00618738
rs17843583	0.00618738
rs17843584	0.00618738
rs201979949	0.00618738
rs762118514	0.00618738
rs371932901	0.00618738
rs578137727	0.00618738
rs9273322	0.00618738
rs9273328	0.00618738
rs9273331	0.00618738
rs9273332	0.00618738
rs9273333	0.00618738
rs9282067	0.00618738
rs9282068	0.00618738
rs9273335	0.00618738
rs9273337	0.00618738
rs9273338	0.00618738
rs9273344	0.00618738
rs9273346	0.00618738
rs9273348	0.00618738
rs9273372	0.00618738
rs9273373	0.00618738
rs9273374	0.00618738
rs9273417	0.00618738
rs9273418	0.00618738
rs9273419	0.00618738
rs9273430	0.00618738
rs9273444	0.00618738
rs9273445	0.00618738
rs9273482	0.00618738
rs9273483	0.00618738
rs9273532	0.00618738
rs9273533	0.00618738
rs9274501	0.00618738
rs796429679	0.00618738
rs9274506	0.00618738
rs9274510	0.00618738
rs1049060	0.00618738
rs1049057	0.00618738
rs9274529	0.00618738
rs9274562	0.00618738
rs9274564	0.00618738
rs9274565	0.00618738
rs9274573	0.00618738
rs9274575	0.00618738
rs3828790	0.00618738
rs3828791	0.00618738
rs3828798	0.00618738
rs3828806	0.00618738
rs3828807	0.00618738
rs3828811	0.00618738
rs17612555	0.00508036
rs1063355	0.00407483
rs144183456	0.00302654
rs6928482	0.00302654
rs17843613	0.0020219
rs17843614	0.0020219
rs17843615	0.0020219
rs17843616	0.0020219
rs138467223	0.0020219
rs17612865	0.0020219
NEC: HLA-DQB2
rsid	PIP
rs9273084	0.0103518
rs17843573	0.0103518
rs17612576	0.0103518
rs17843577	0.0103518
rs17843580	0.0103518
rs17612625	0.0103518
rs17612633	0.0103518
rs17612781	0.0103518
rs17612788	0.0103518
rs17612802	0.0103518
rs17612858	0.0103518
rs9273326	0.0103518
rs9273329	0.0103518
rs9273330	0.0103518
rs9273339	0.0103518
rs3828789	0.0103518
rs9274660	0.0103518
rs9272355	0.0103518
rs5002184	0.0103518
rs5002183	0.0103518
rs5002182	0.0103518
rs9273013	0.0103518
rs9273027	0.0103518
rs9273030	0.0103518
rs9273038	0.0103518
rs9273043	0.0103518
rs9273053	0.0103518
rs9273056	0.0103518
rs9273065	0.0103518
rs9273066	0.0103518
rs9273069	0.0103518
rs9273074	0.0103518
rs9273075	0.0103518
rs9273078	0.0103518
rs9273081	0.0103518
rs9273082	0.0103518
rs9273083	0.0103518
rs9273086	0.0103518
rs9273242	0.0103518
rs9273243	0.0103518
rs17843575	0.0103518
rs17843576	0.0103518
rs17612562	0.0103518
rs17612583	0.0103518
rs17843578	0.0103518
rs17843579	0.0103518
rs17612590	0.0103518
rs17612597	0.0103518
rs17612604	0.0103518
rs17612610	0.0103518
rs17612617	0.0103518
rs17843581	0.0103518
rs17843582	0.0103518
rs17843583	0.0103518
rs17843584	0.0103518
rs201979949	0.0103518
rs762118514	0.0103518
rs371932901	0.0103518
rs17843613	0.0103518
rs17843614	0.0103518
rs17843615	0.0103518
rs17843616	0.0103518
rs578137727	0.0103518
rs9273322	0.0103518
rs9273328	0.0103518
rs9273331	0.0103518
rs9273332	0.0103518
rs9273333	0.0103518
rs9282067	0.0103518
rs9282068	0.0103518
rs9273335	0.0103518
rs9273337	0.0103518
rs9273338	0.0103518
rs9273343	0.0103518
rs9273344	0.0103518
rs9273346	0.0103518
rs9273348	0.0103518
rs9273372	0.0103518
rs9273373	0.0103518
rs9273374	0.0103518
rs9273430	0.0103518
rs9273444	0.0103518
rs9273445	0.0103518
rs9273532	0.0103518
rs9273533	0.0103518
rs9274501	0.0103518
rs9274506	0.0103518
rs9274529	0.0103518
rs9274565	0.0103518
rs3828790	0.0103518
rs3828791	0.0103518
rs3828798	0.0103518
chr6:32635936_T_C	0.0103518
rs9273046	0.00554612

[truncated: 2 more sheets: S15, S20]
